# Supplementary material
Source: PubMed Central journal article supplement (PMC7075704)

# Identification of Psychoplastogenic *N,N*-Dimethylaminoisotryptamine (isoDMT) Analogs Through Structure-Activity Relationship Studies

## Supplemental Material

(62 pages)

Lee E. Dunlap, Arya Azinfar, Calvin Ly, Lindsay P. Cameron, Jayashri Viswanathan, Robert J. Tombari, Douglas Myers-Turnbull, Jack C. Taylor, Ana Cristina Grodzki, Pamela J. Lein, David Kokel, David E. Olson\*

### **Contents**

*Figure S1*

*Figure S2*

*Figure S3*

*Spectral Data*

| Compound | MPO Score | % Efficacy |
|----------|-----------|------------|
| 1        | 4.1       | 79%        |
| 2        | 4.4       | 87%        |
| 4        | 4.4       | 26%        |
| 5        | 4.4       | 65%        |
| 6        | 4.4       | 95%        |
| 7        | 4.4       | 92%        |
| 8        | 3.9       | 38%        |
| 9        | 3.9       | 78%        |
| 10       | 3.9       | 65%        |
| 11       | 3.9       | 131%       |
| 12       | 4.4       | 37%        |
| 13       | 4.4       | 75%        |
| 14       | 4.4       | 88%        |
| 15       | 4.4       | 85%        |
| 16       | 4.4       | 104%       |
| 17       | 4.4       | 84%        |
| 18       | 4.4       | 62%        |
| 19       | 5.4       | 85%        |
| 20       | 4.4       | 117%       |
| 21       | 5.5       | 72%        |
| 22       | 4.9       | 50%        |
| 23       | 4.4       | 64%        |
| 24       | 4.1       | 86%        |
| 25       | 3.5       | 17%        |
| 26       | 4.2       | 70%        |
| 27       | 4.3       | 73%        |
| 28       | 4.6       | 80%        |
| 29       | 4.2       | 81%        |
| 30       | 4.6       | 72%        |

**Figure S1. CNS MPO Scores and Maximum Psychoplastogenicity.** Central nervous system (CNS) multiparameter optimization (MPO) scores were determined by the method described in reference 21. Maximum psychoplastogenicity is expressed as percent efficacy of the  $N_{max}$  value relative to the vehicle (0%) and positive (ketamine, 100%) controls.

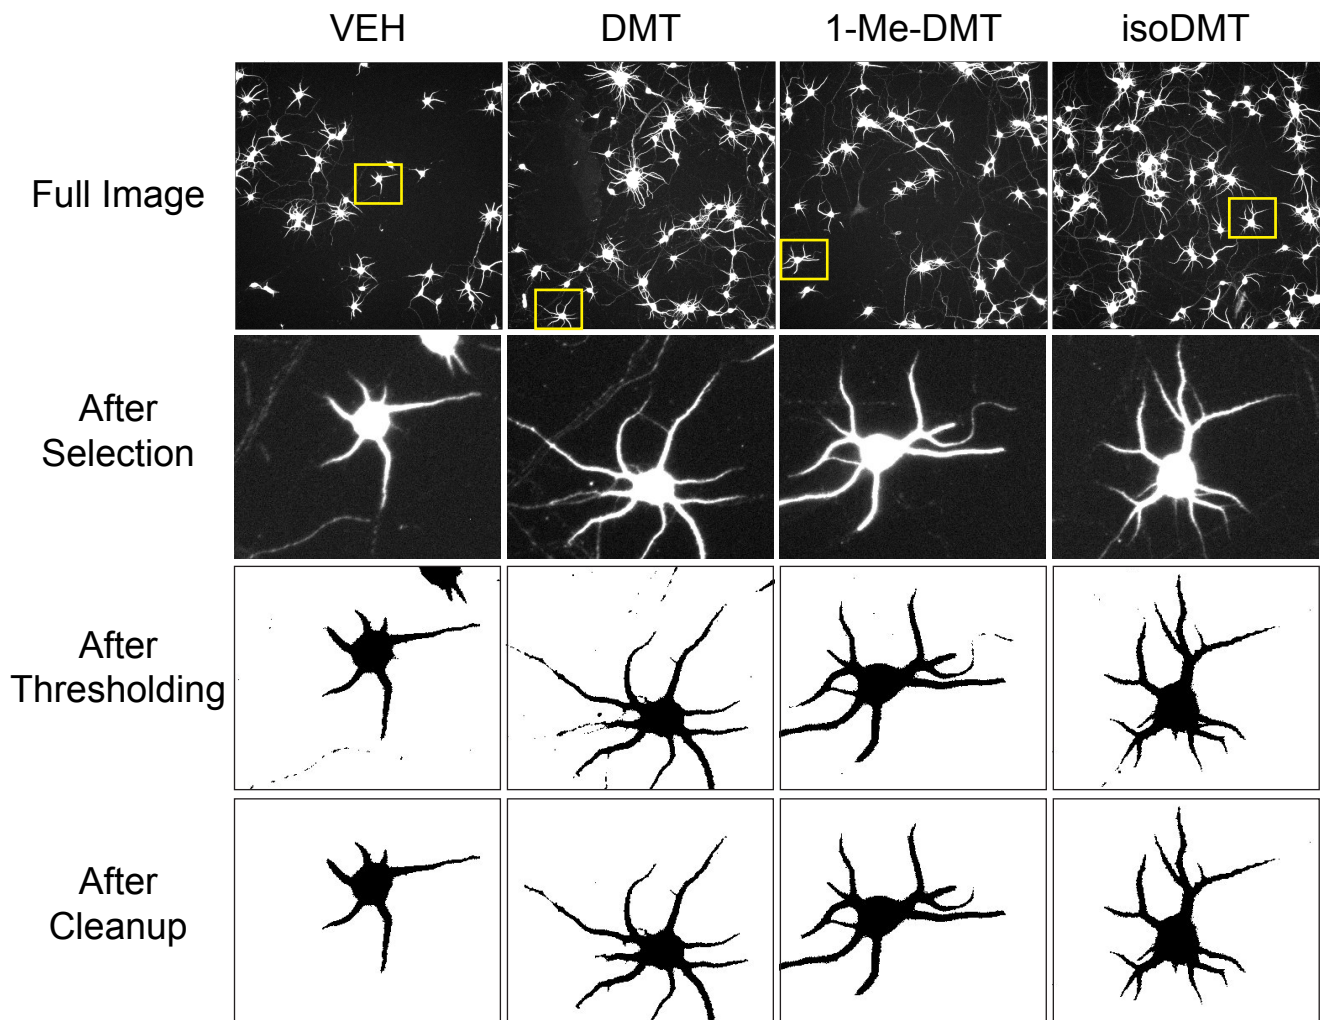

**Figure S2. Process for converting images into files suitable for data analysis.** Images were acquired on a high content confocal microscope using a 20x objective. Then, well defined pyramidal-like neurons were selected (yellow boxes). Predetermined thresholding values were applied to all images. Finally, adjacent cells and signals noncontiguous with the neuron being analyzed were removed prior to running the Sholl analysis macro. All data processing was performed by experimenters blinded to treatment conditions. The examples shown here correspond to the representative images depicted in Figure 4.

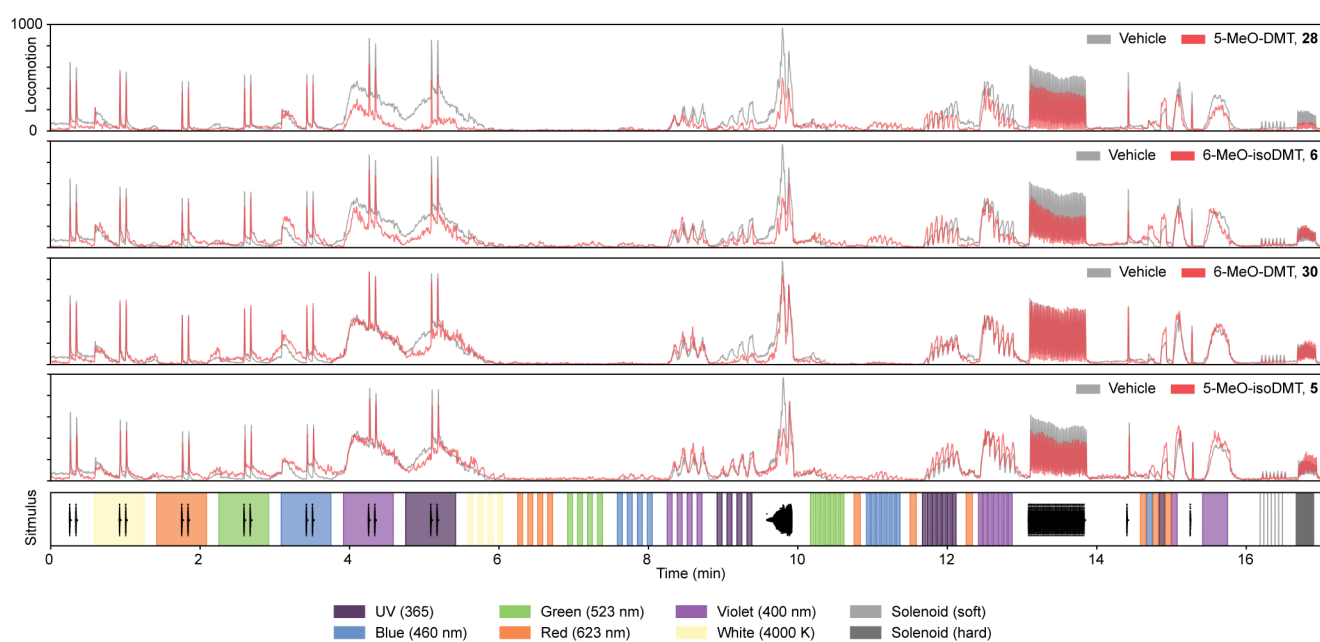

**Figure S3. Zebrafish motion traces with associated stimuli.** Top: Locomotion in wells treated with vehicle (gray) or compounds (200  $\mu$ M, red). Bottom: Stimuli applied over time. Colors indicate bright LED light of respective colors. Black traces represent the waveform of acoustic stimuli, and gray vertical lines indicate physical tapping as secondary acoustic stimuli.



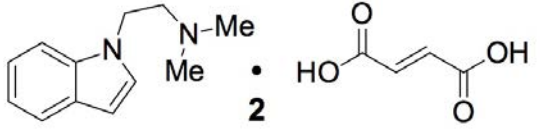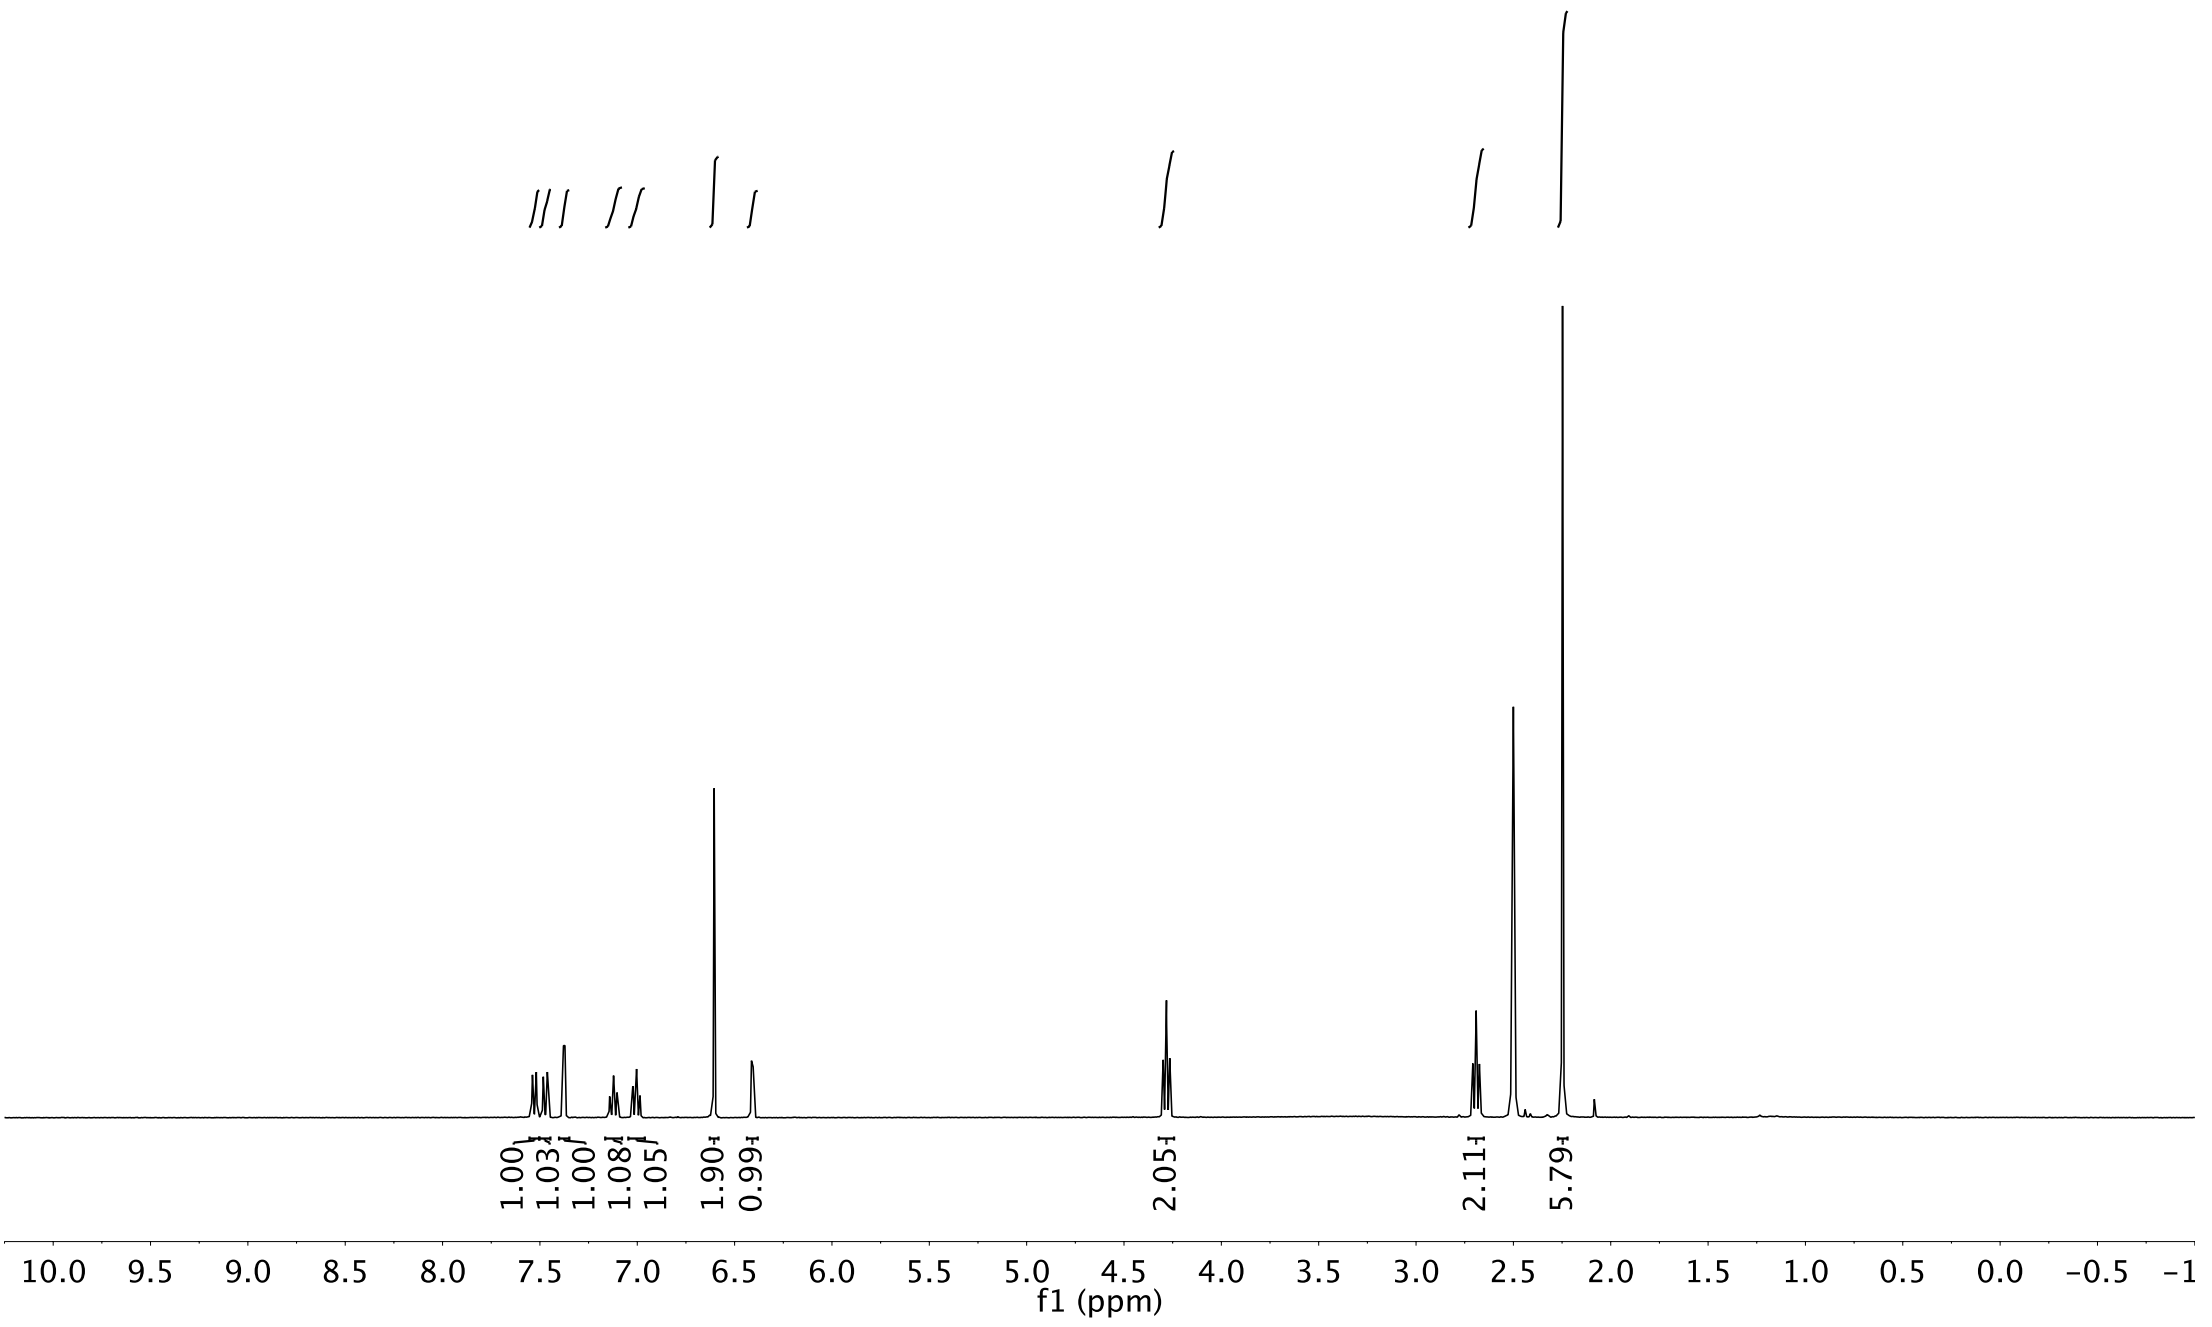

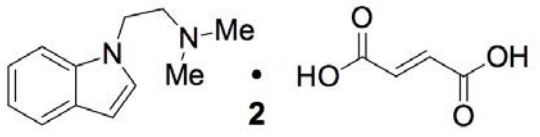

-166.32

135.66  
134.20  
128.82  
128.06  
120.96  
120.38  
118.88

-109.68

-100.54

-58.09

44.83  
43.11

S6

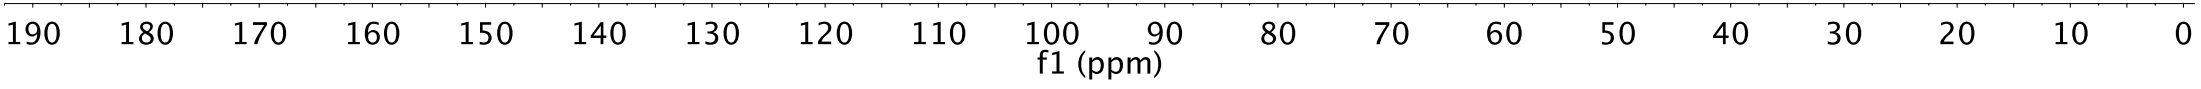

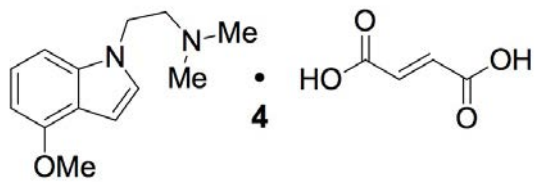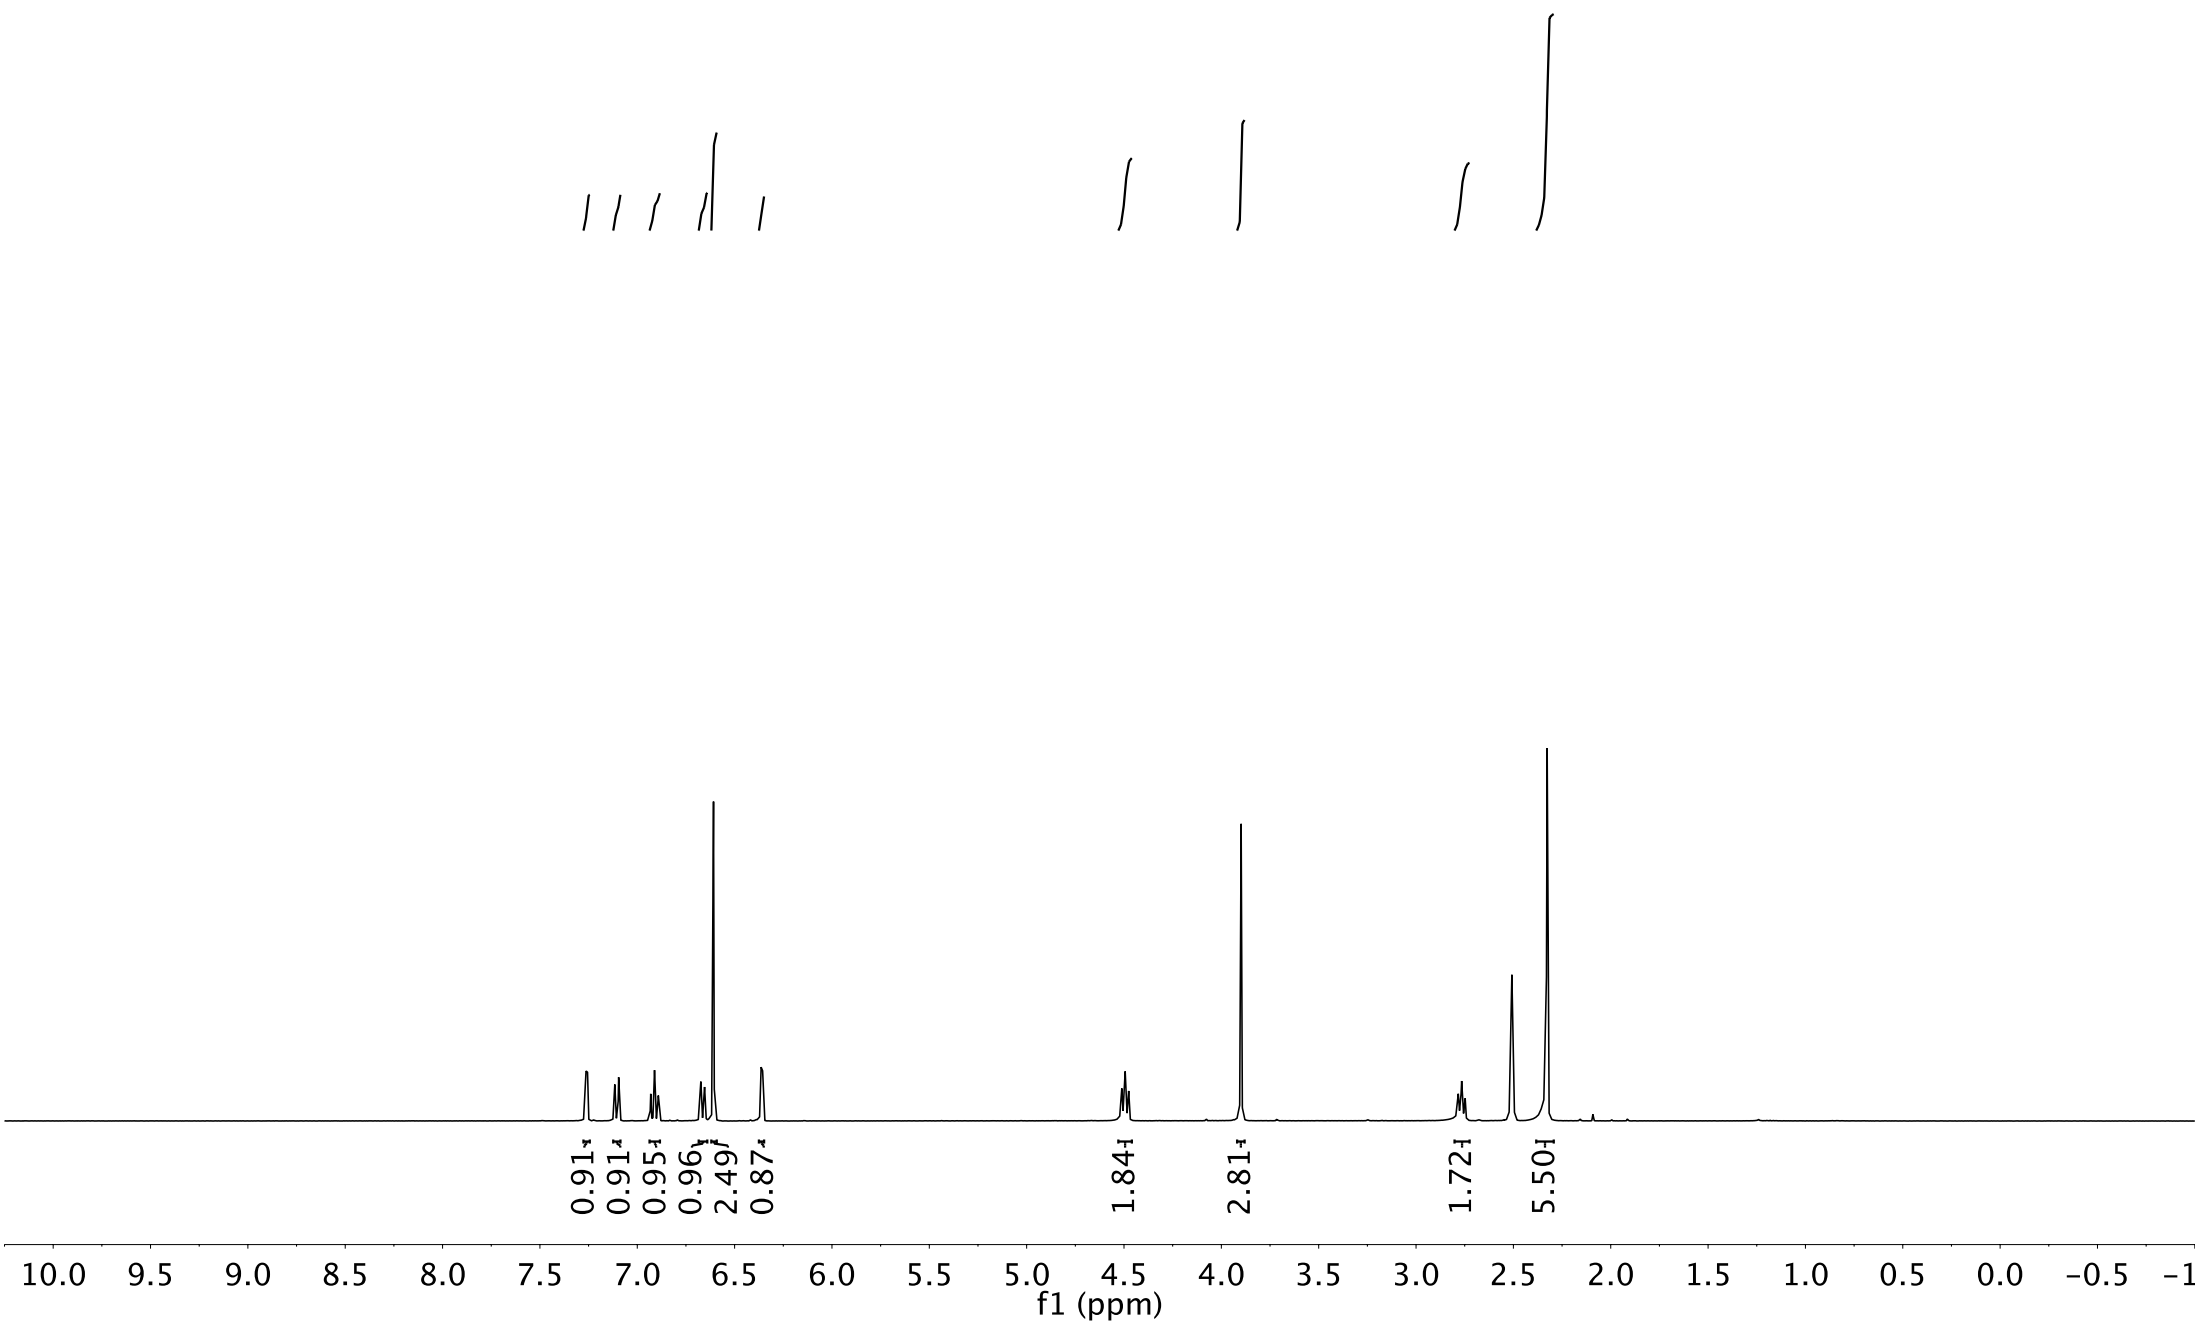

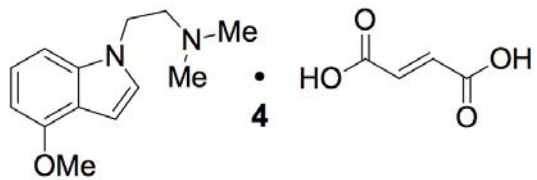

-166.30

-146.96

134.17

130.46

129.79

124.94

119.64

113.33

102.42

100.93

-59.61

-55.32

45.63

44.61

S8

190 180 170 160 150 140 130 120 110 100 90 80 70 60 50 40 30 20 10 0

f1 (ppm)

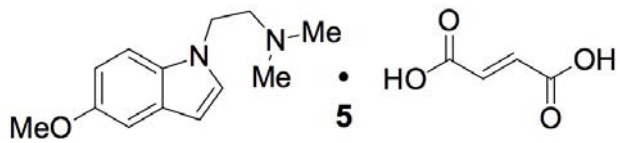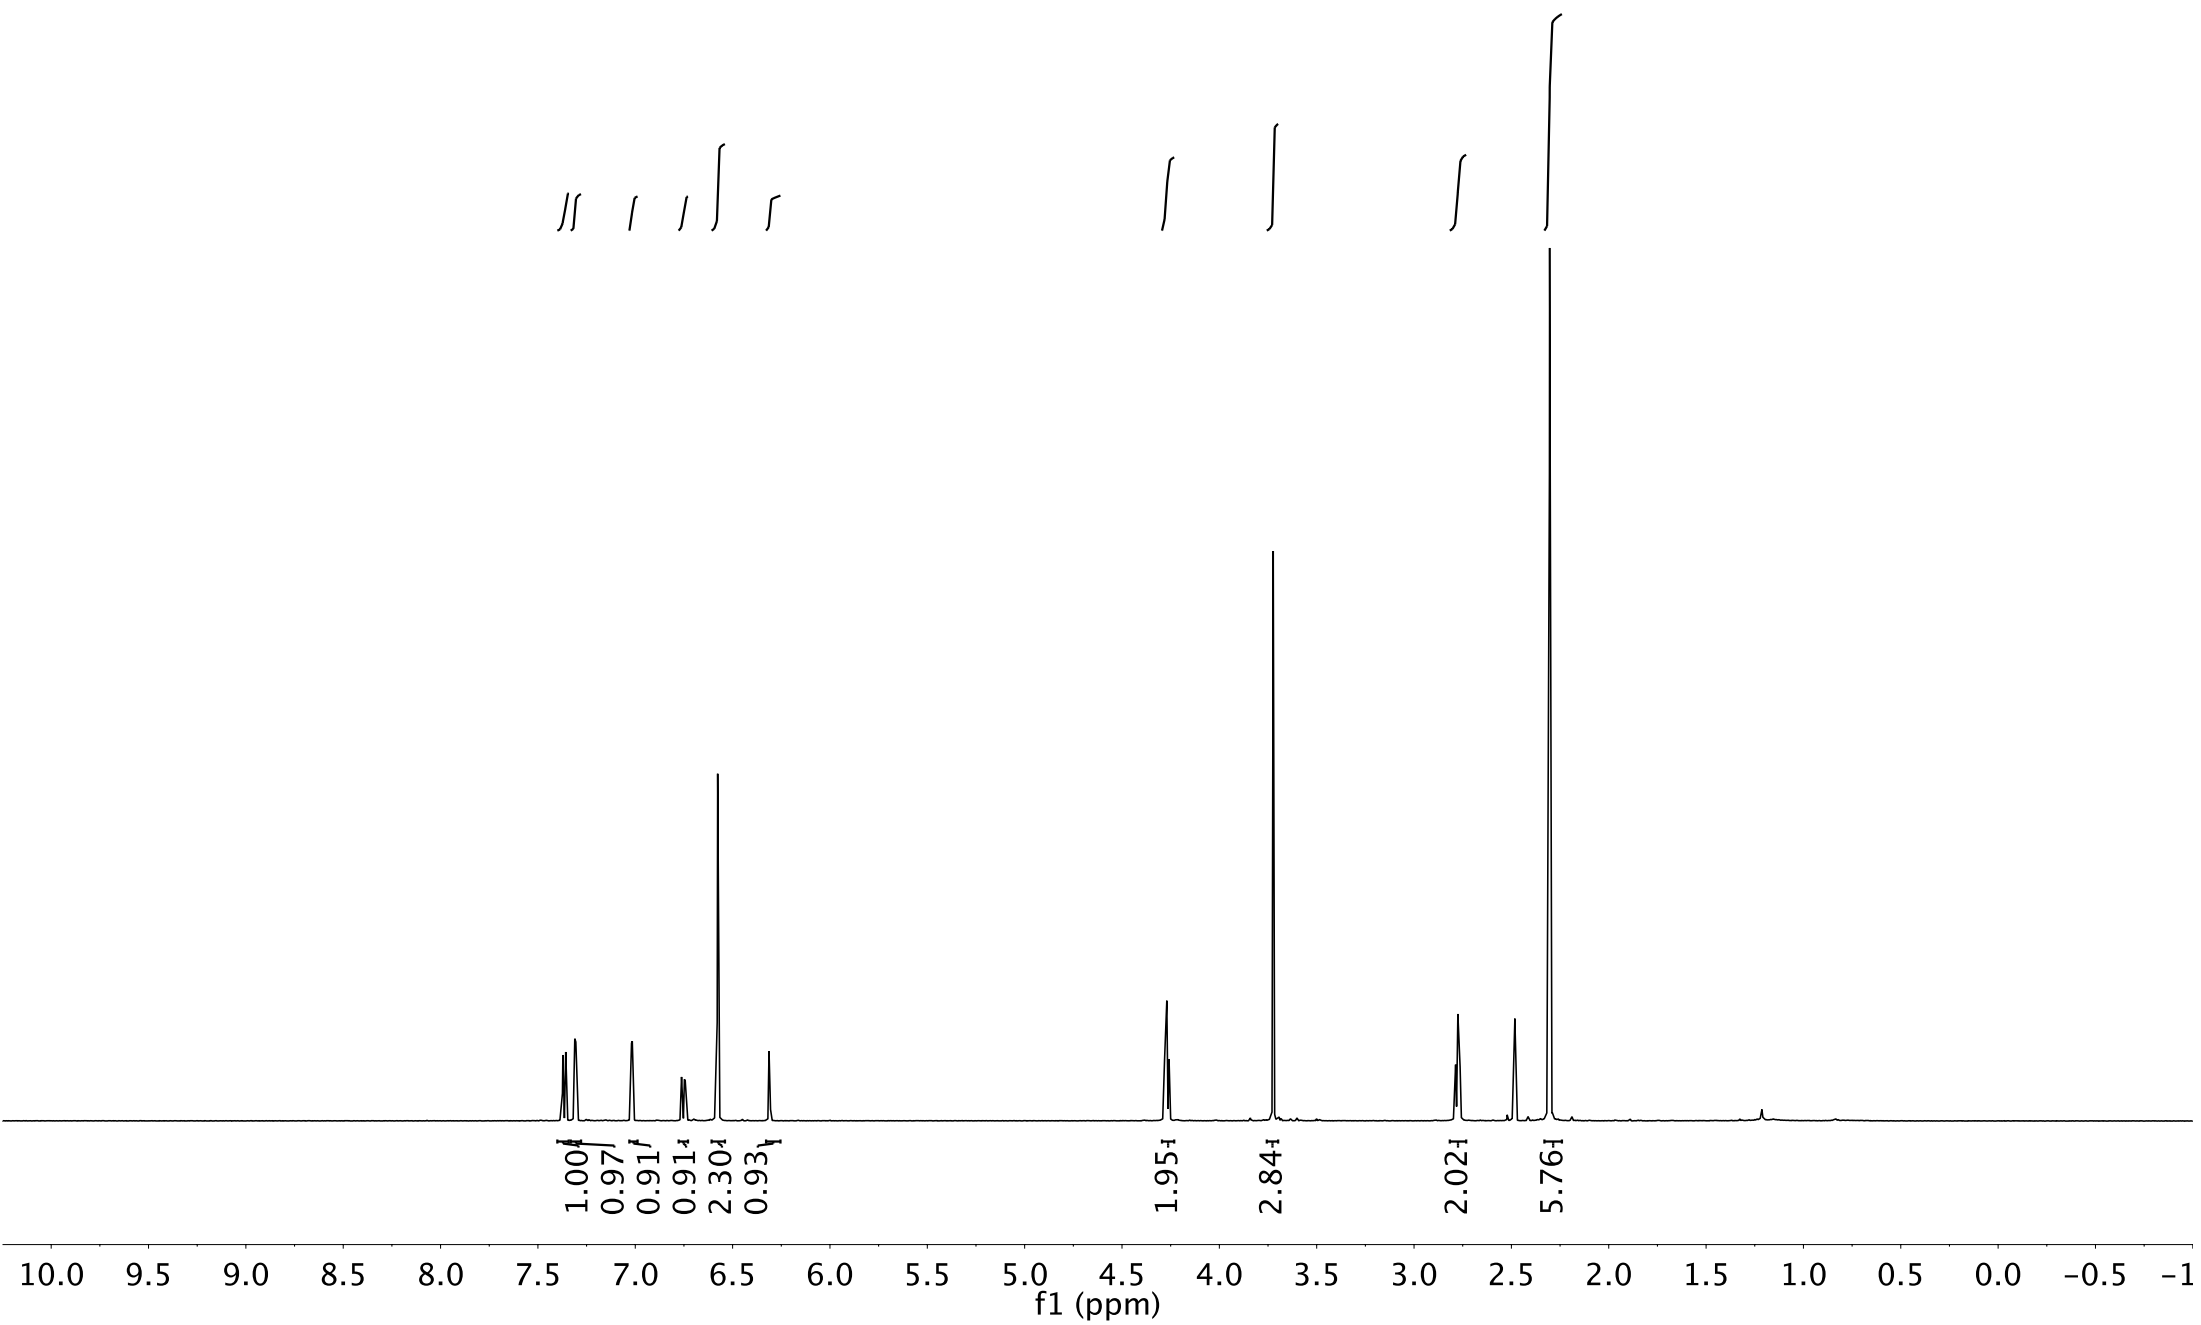

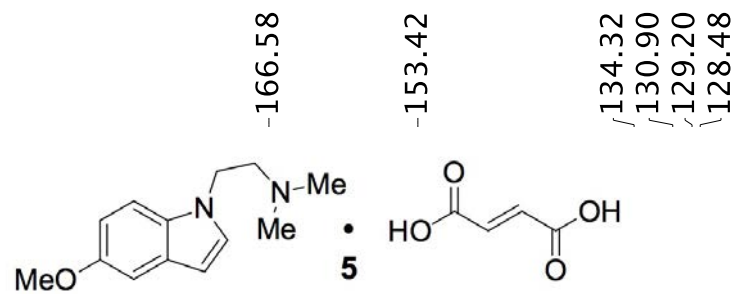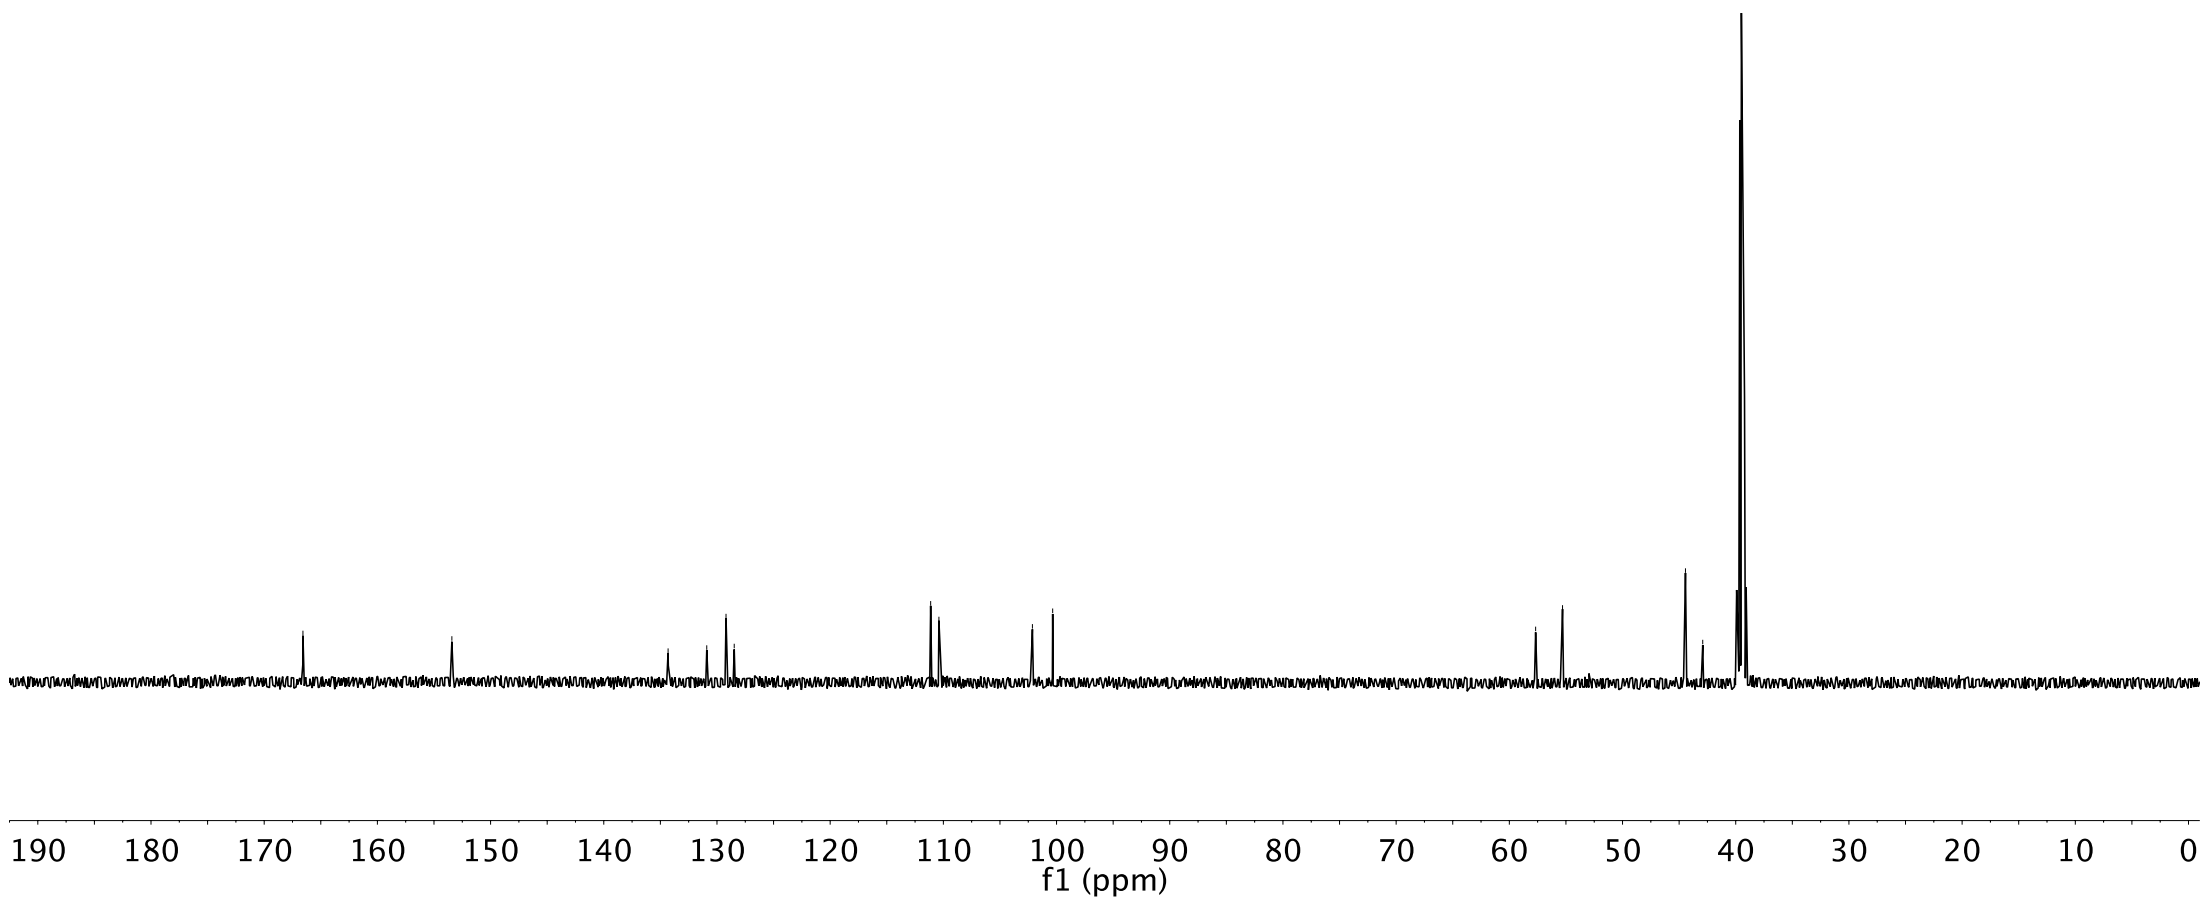

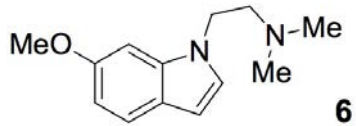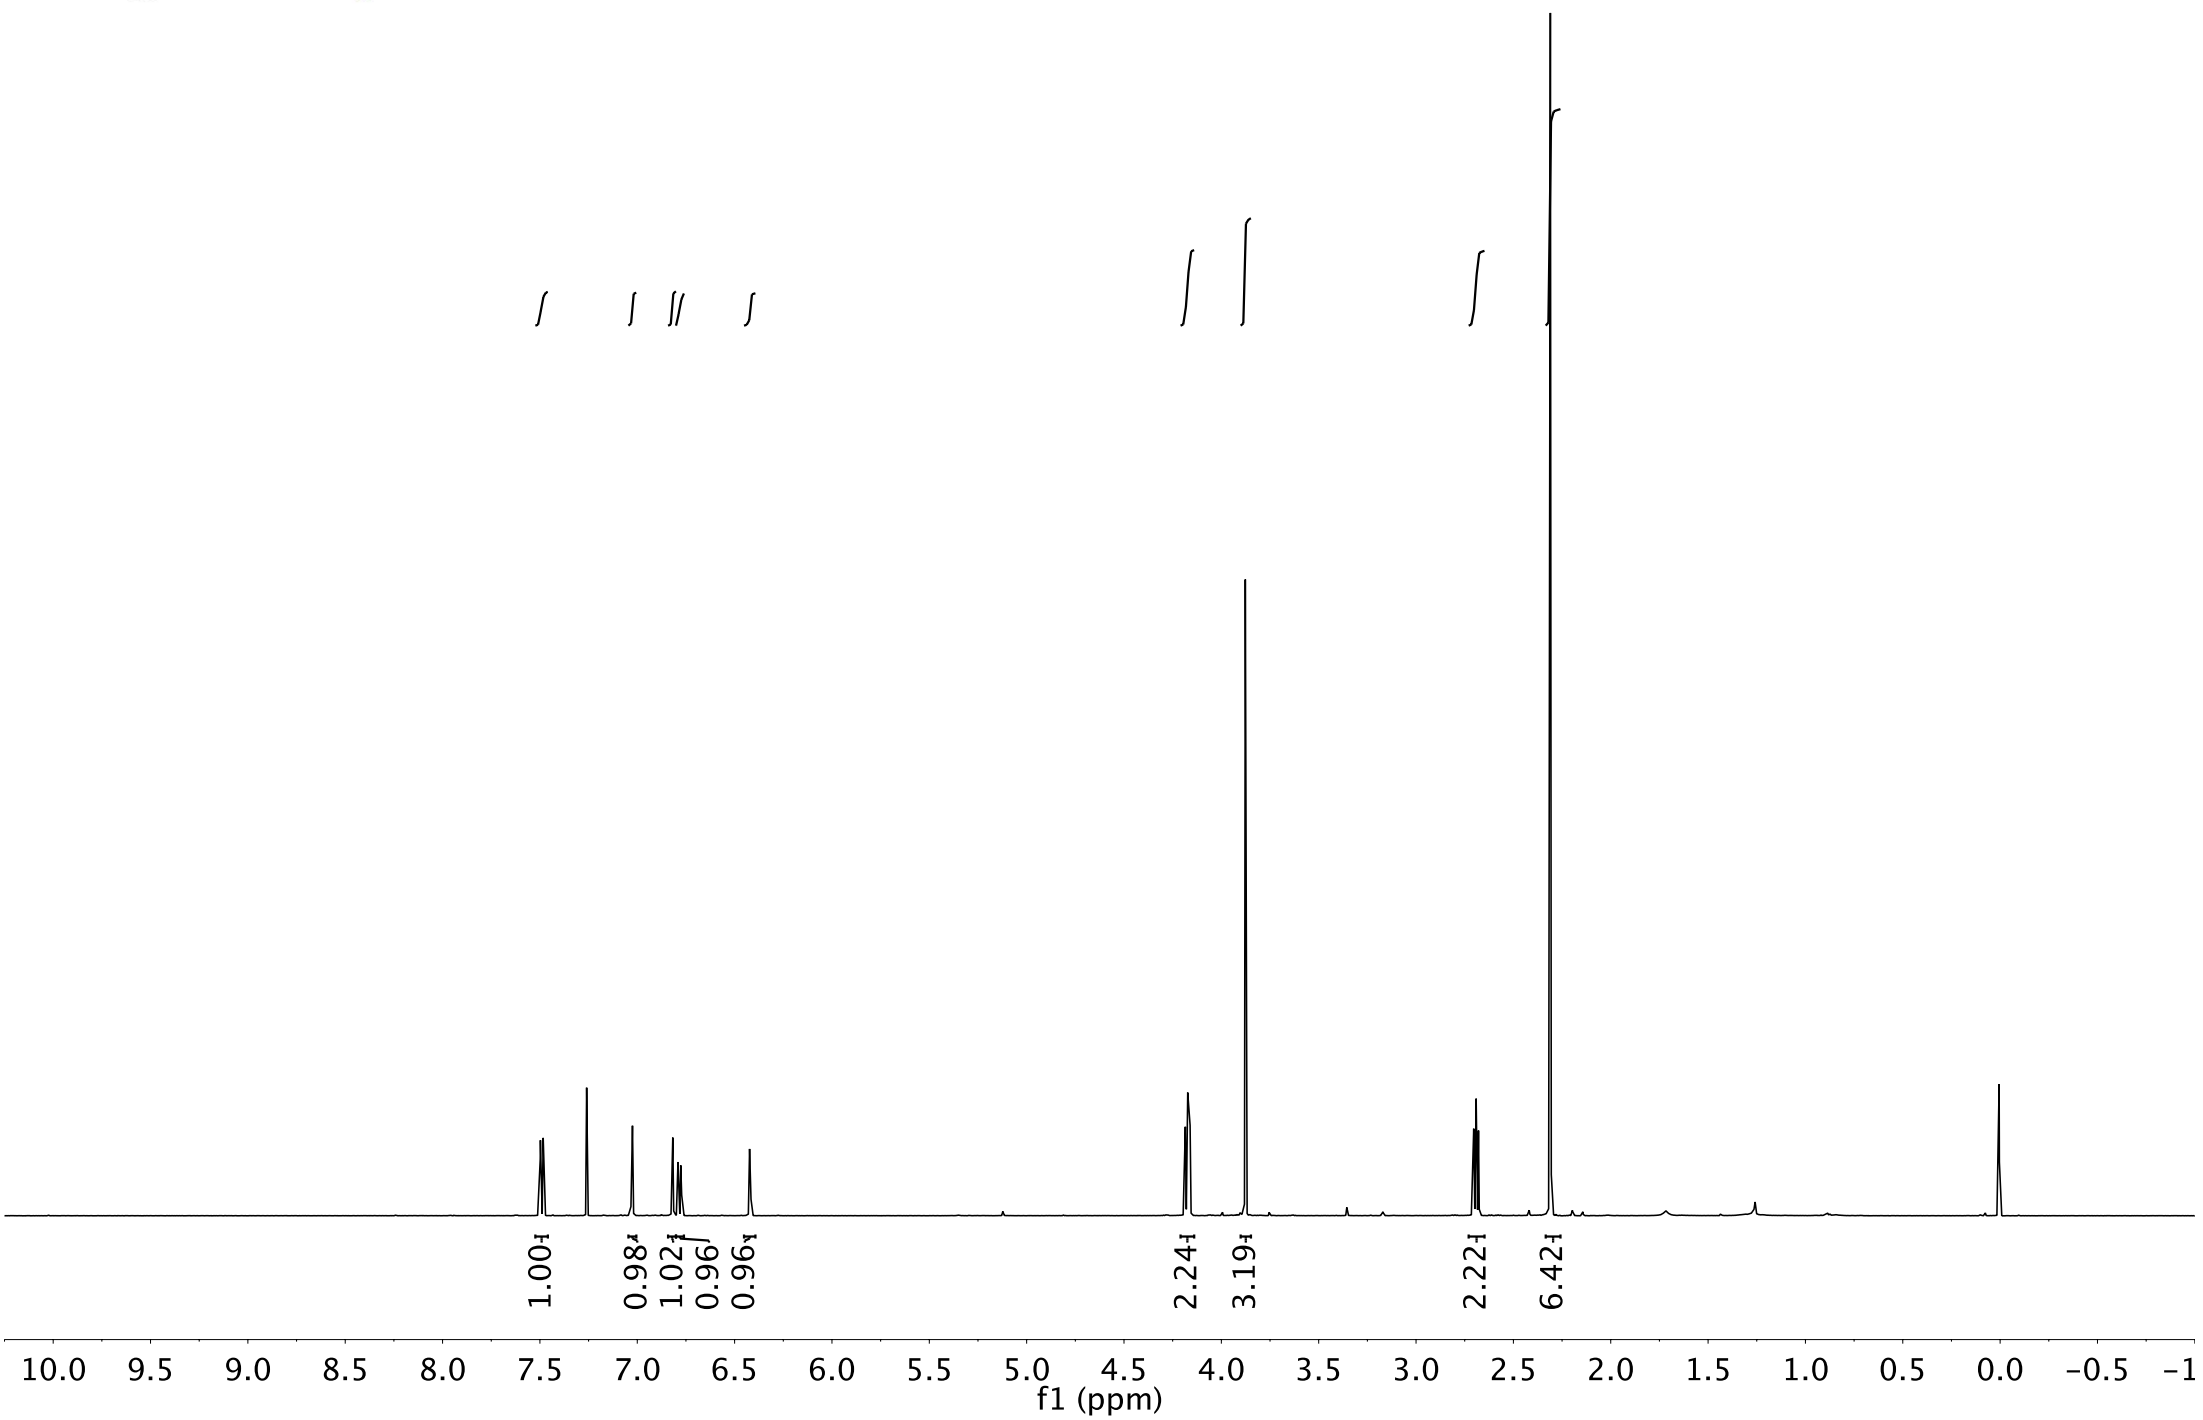

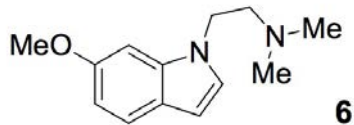

-156.30

-136.77

-127.04

-123.00

-121.67

-109.22

-101.31

-93.14

-59.00

-55.91

-45.94

-44.91

S12

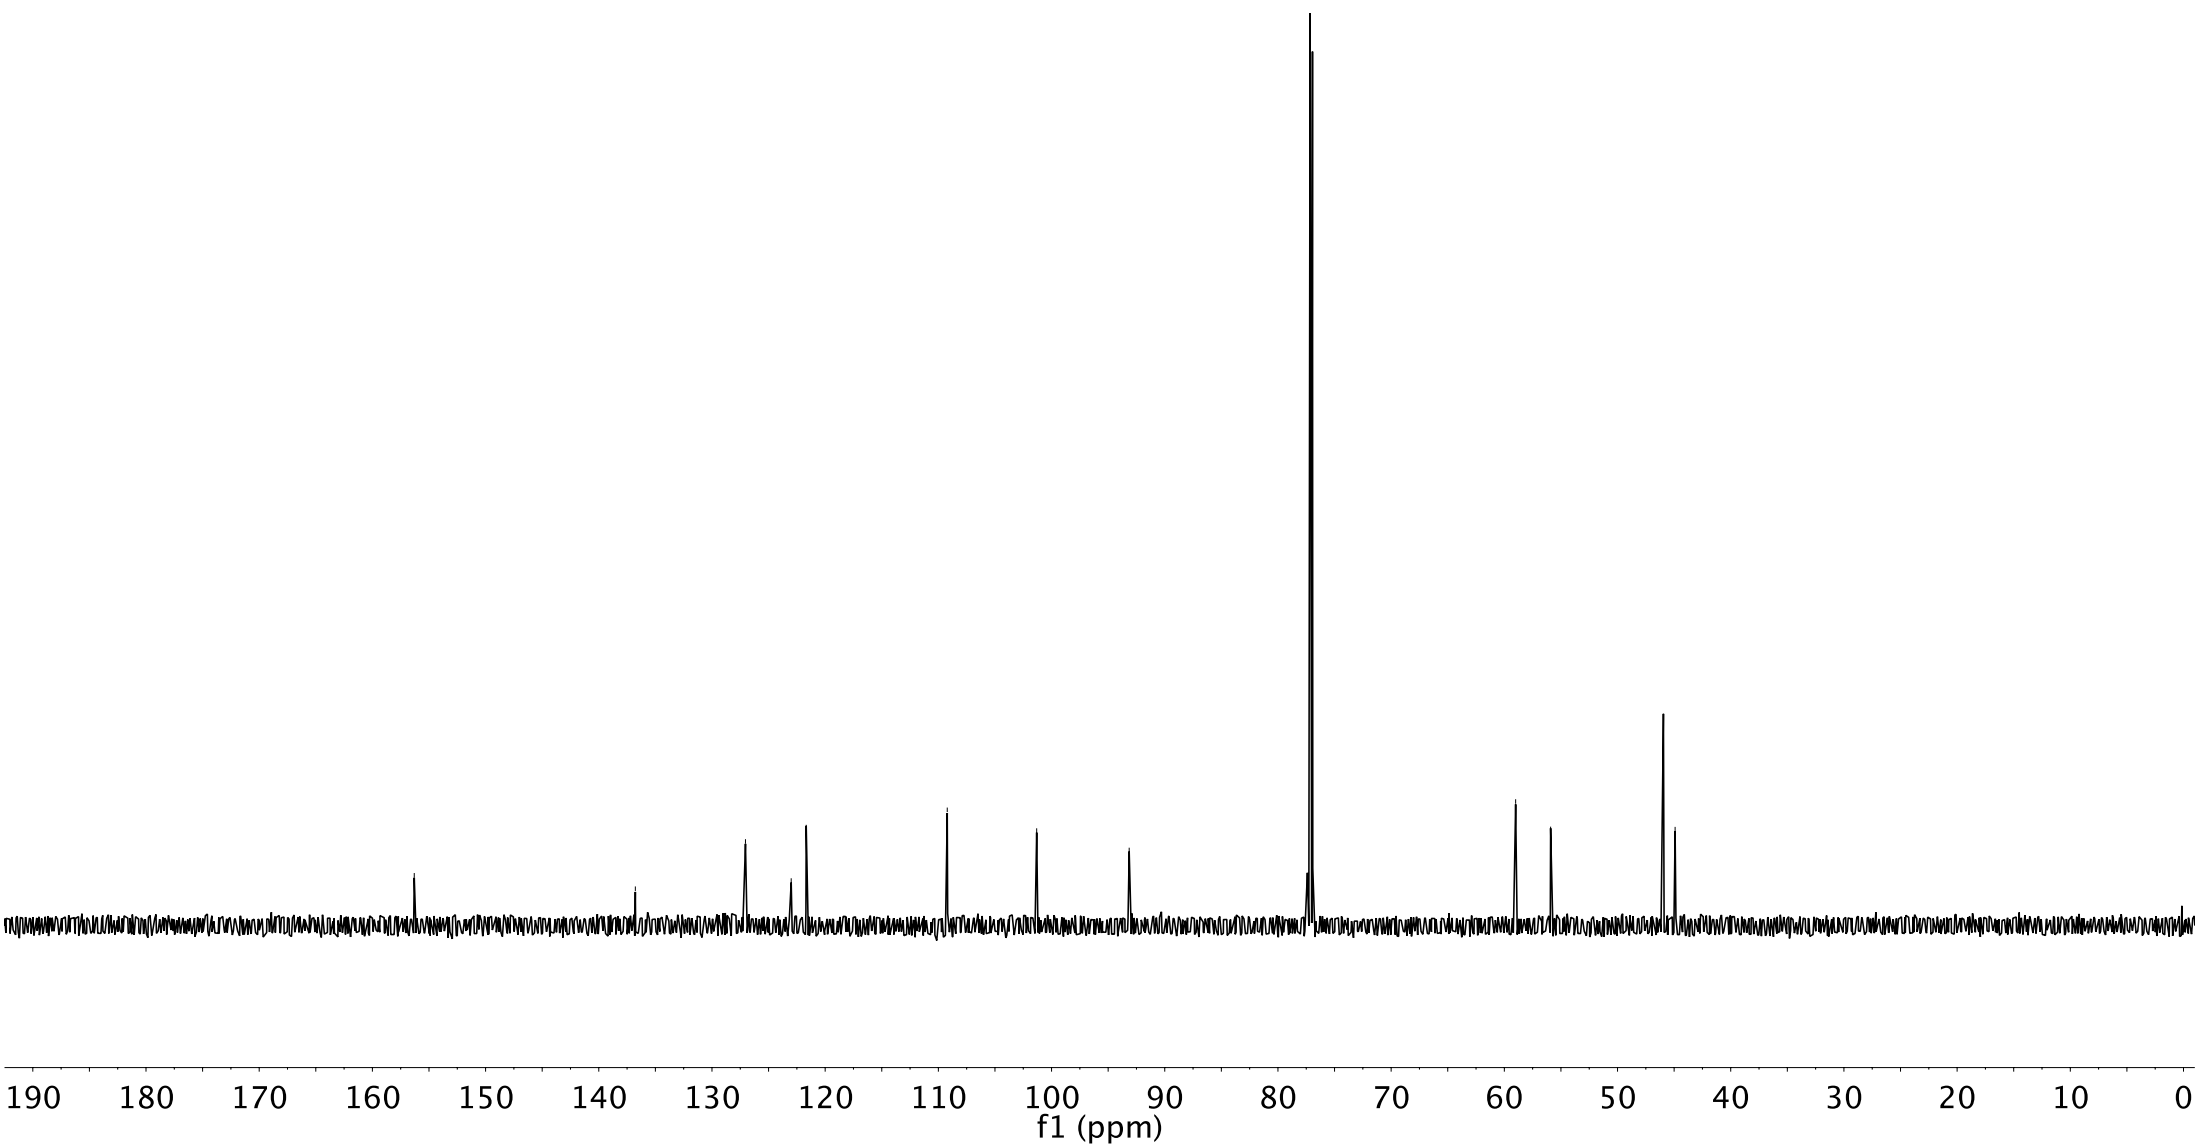



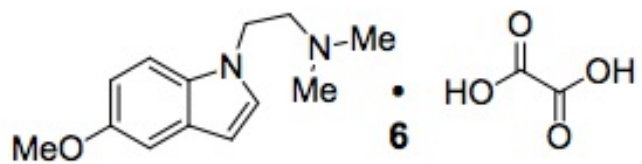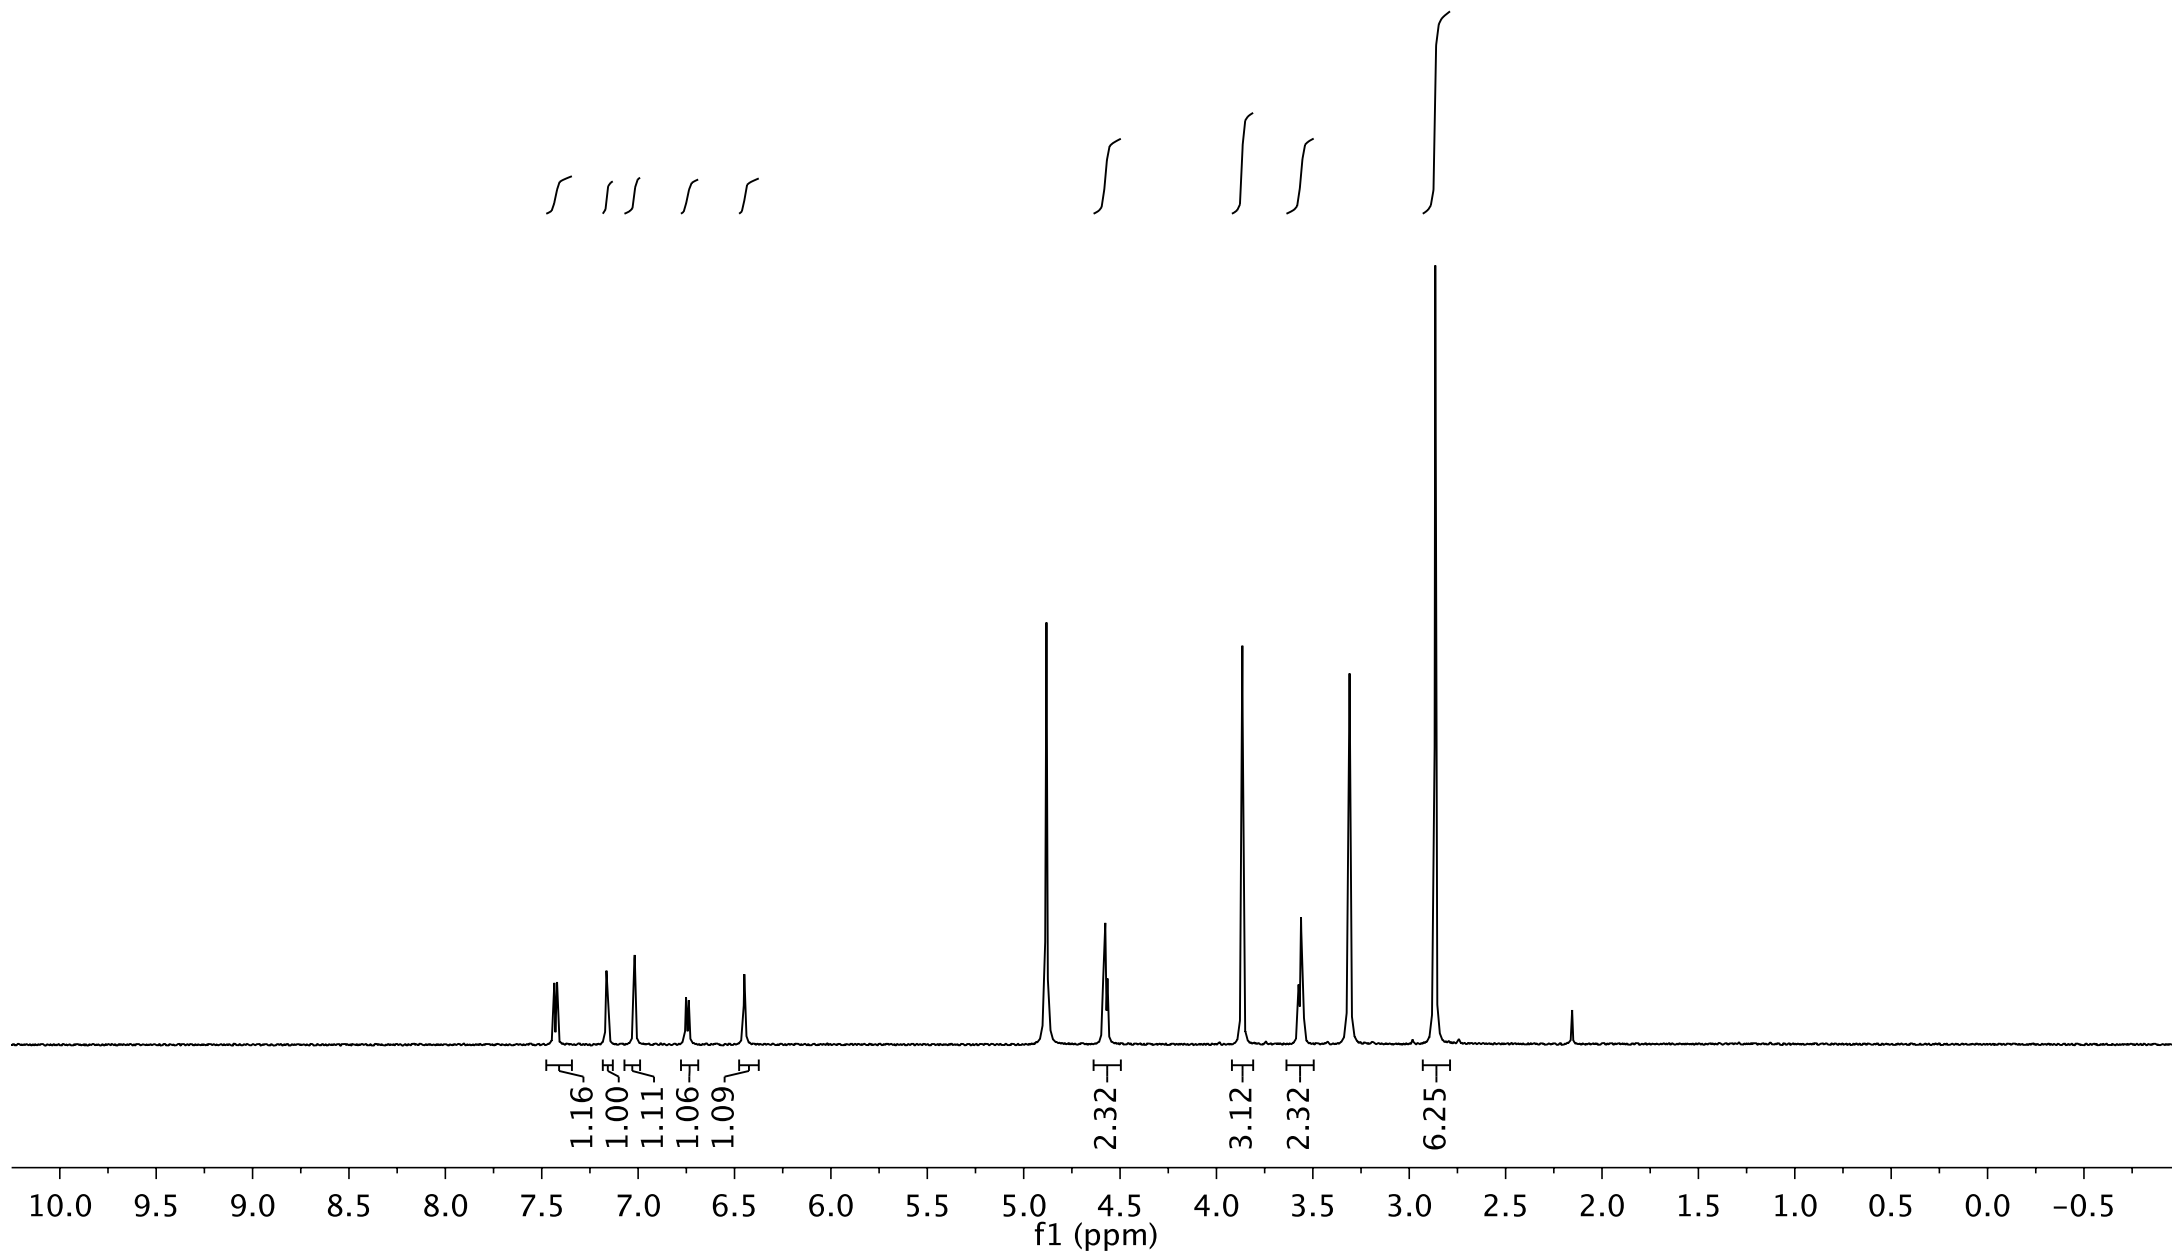

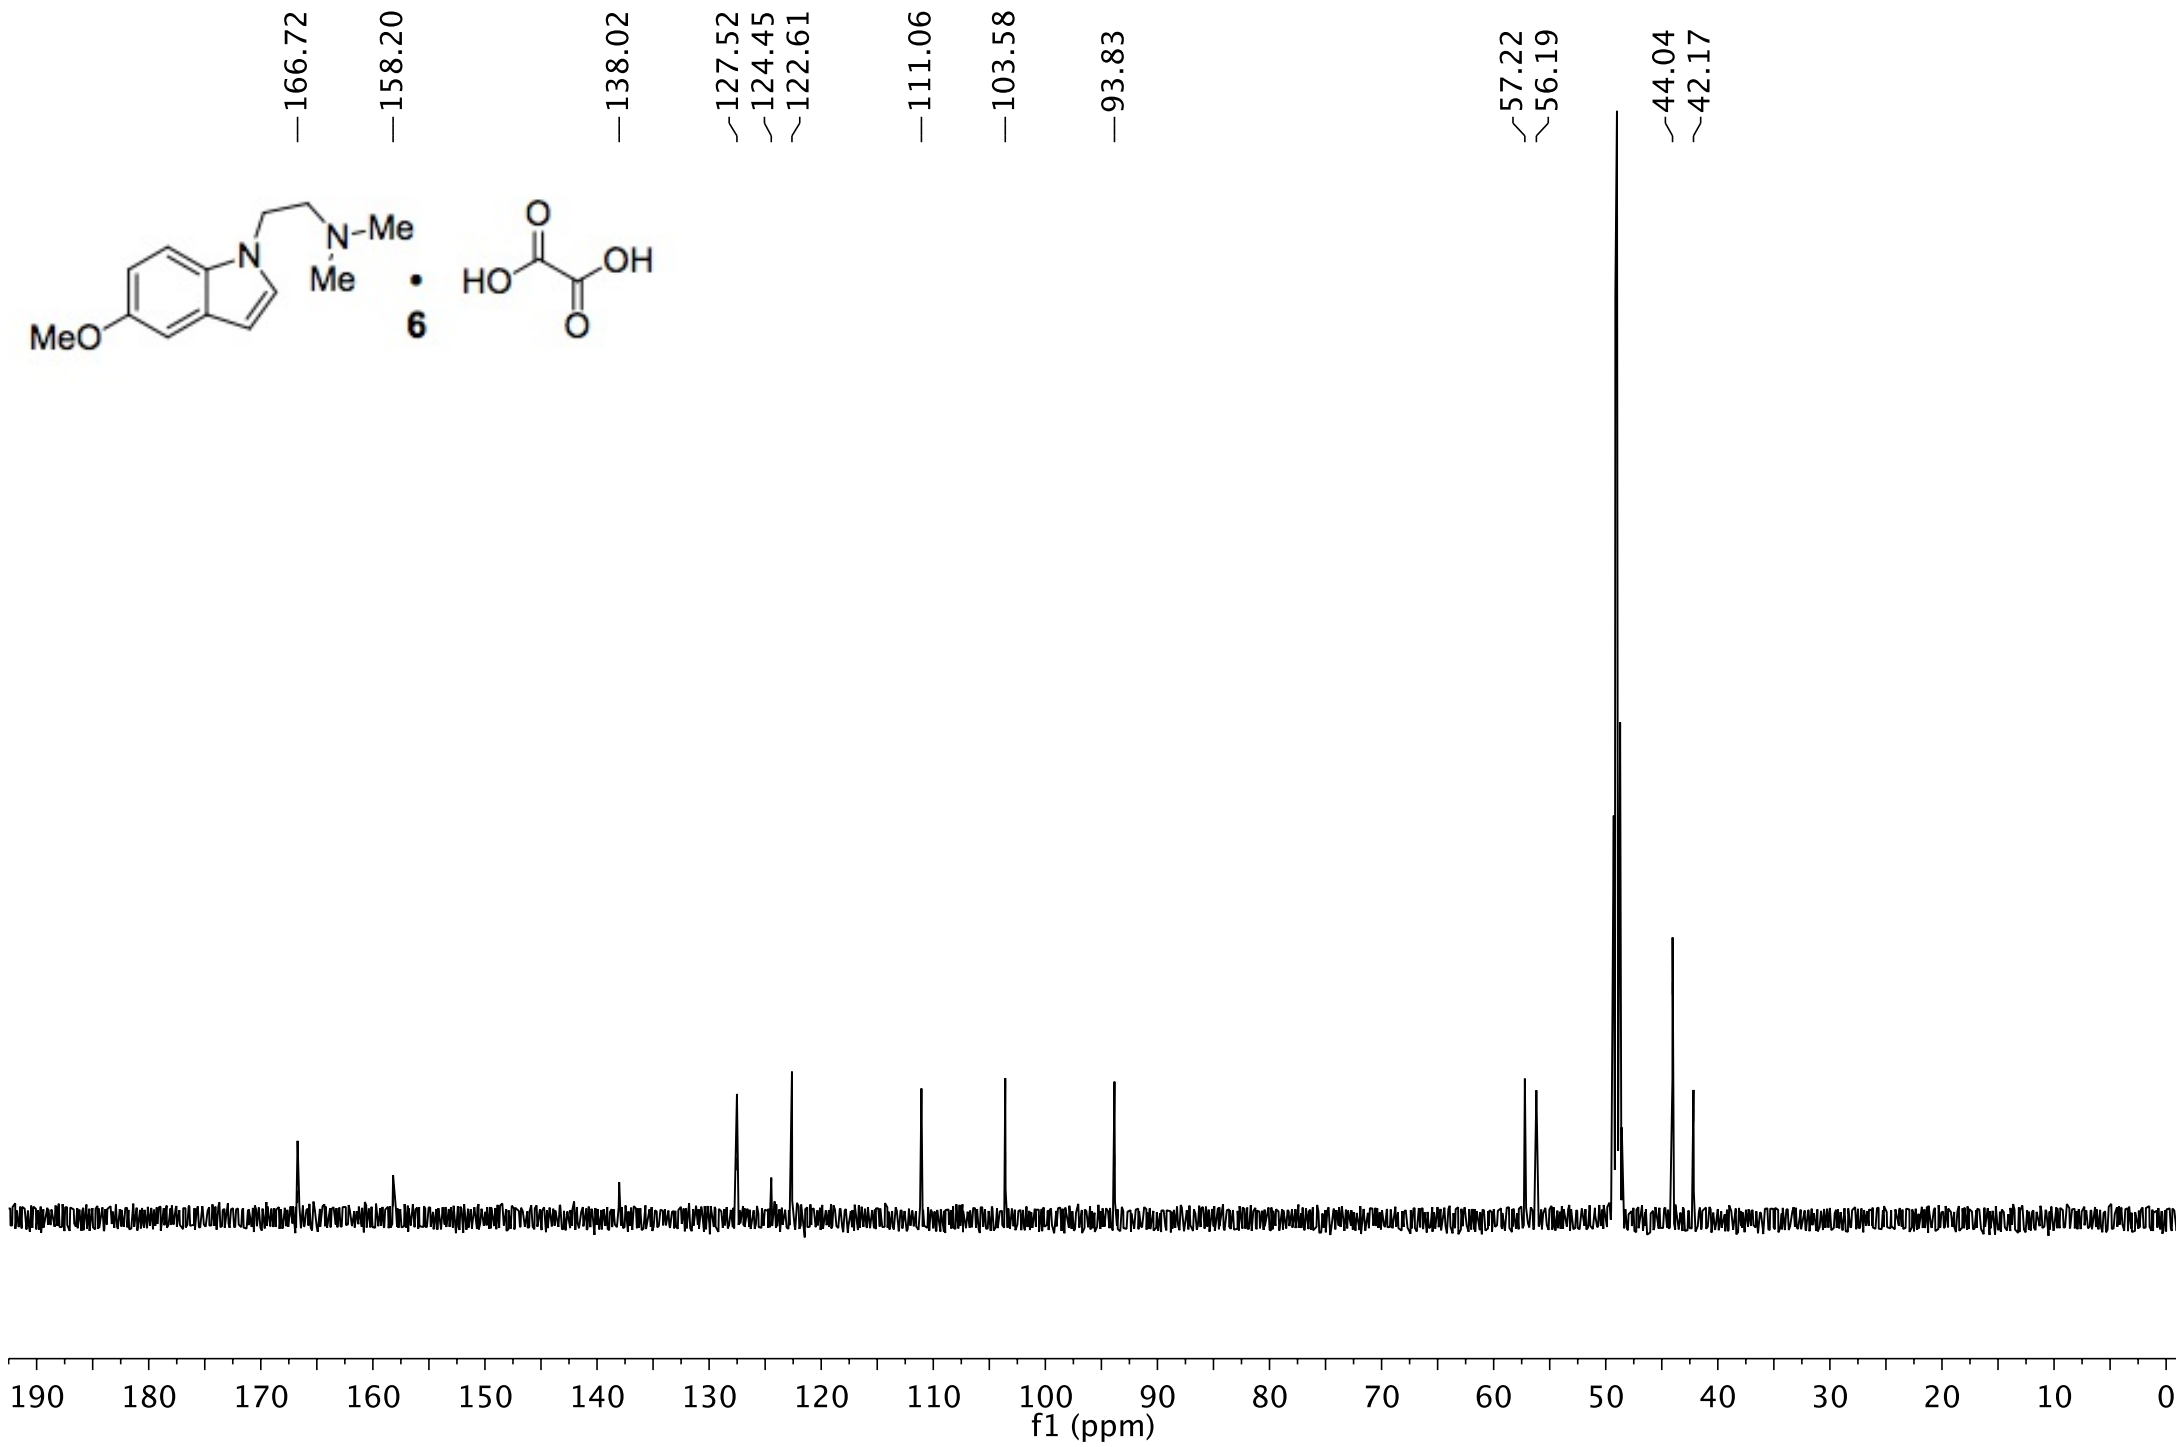

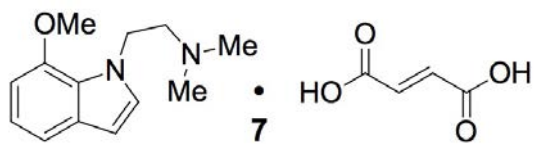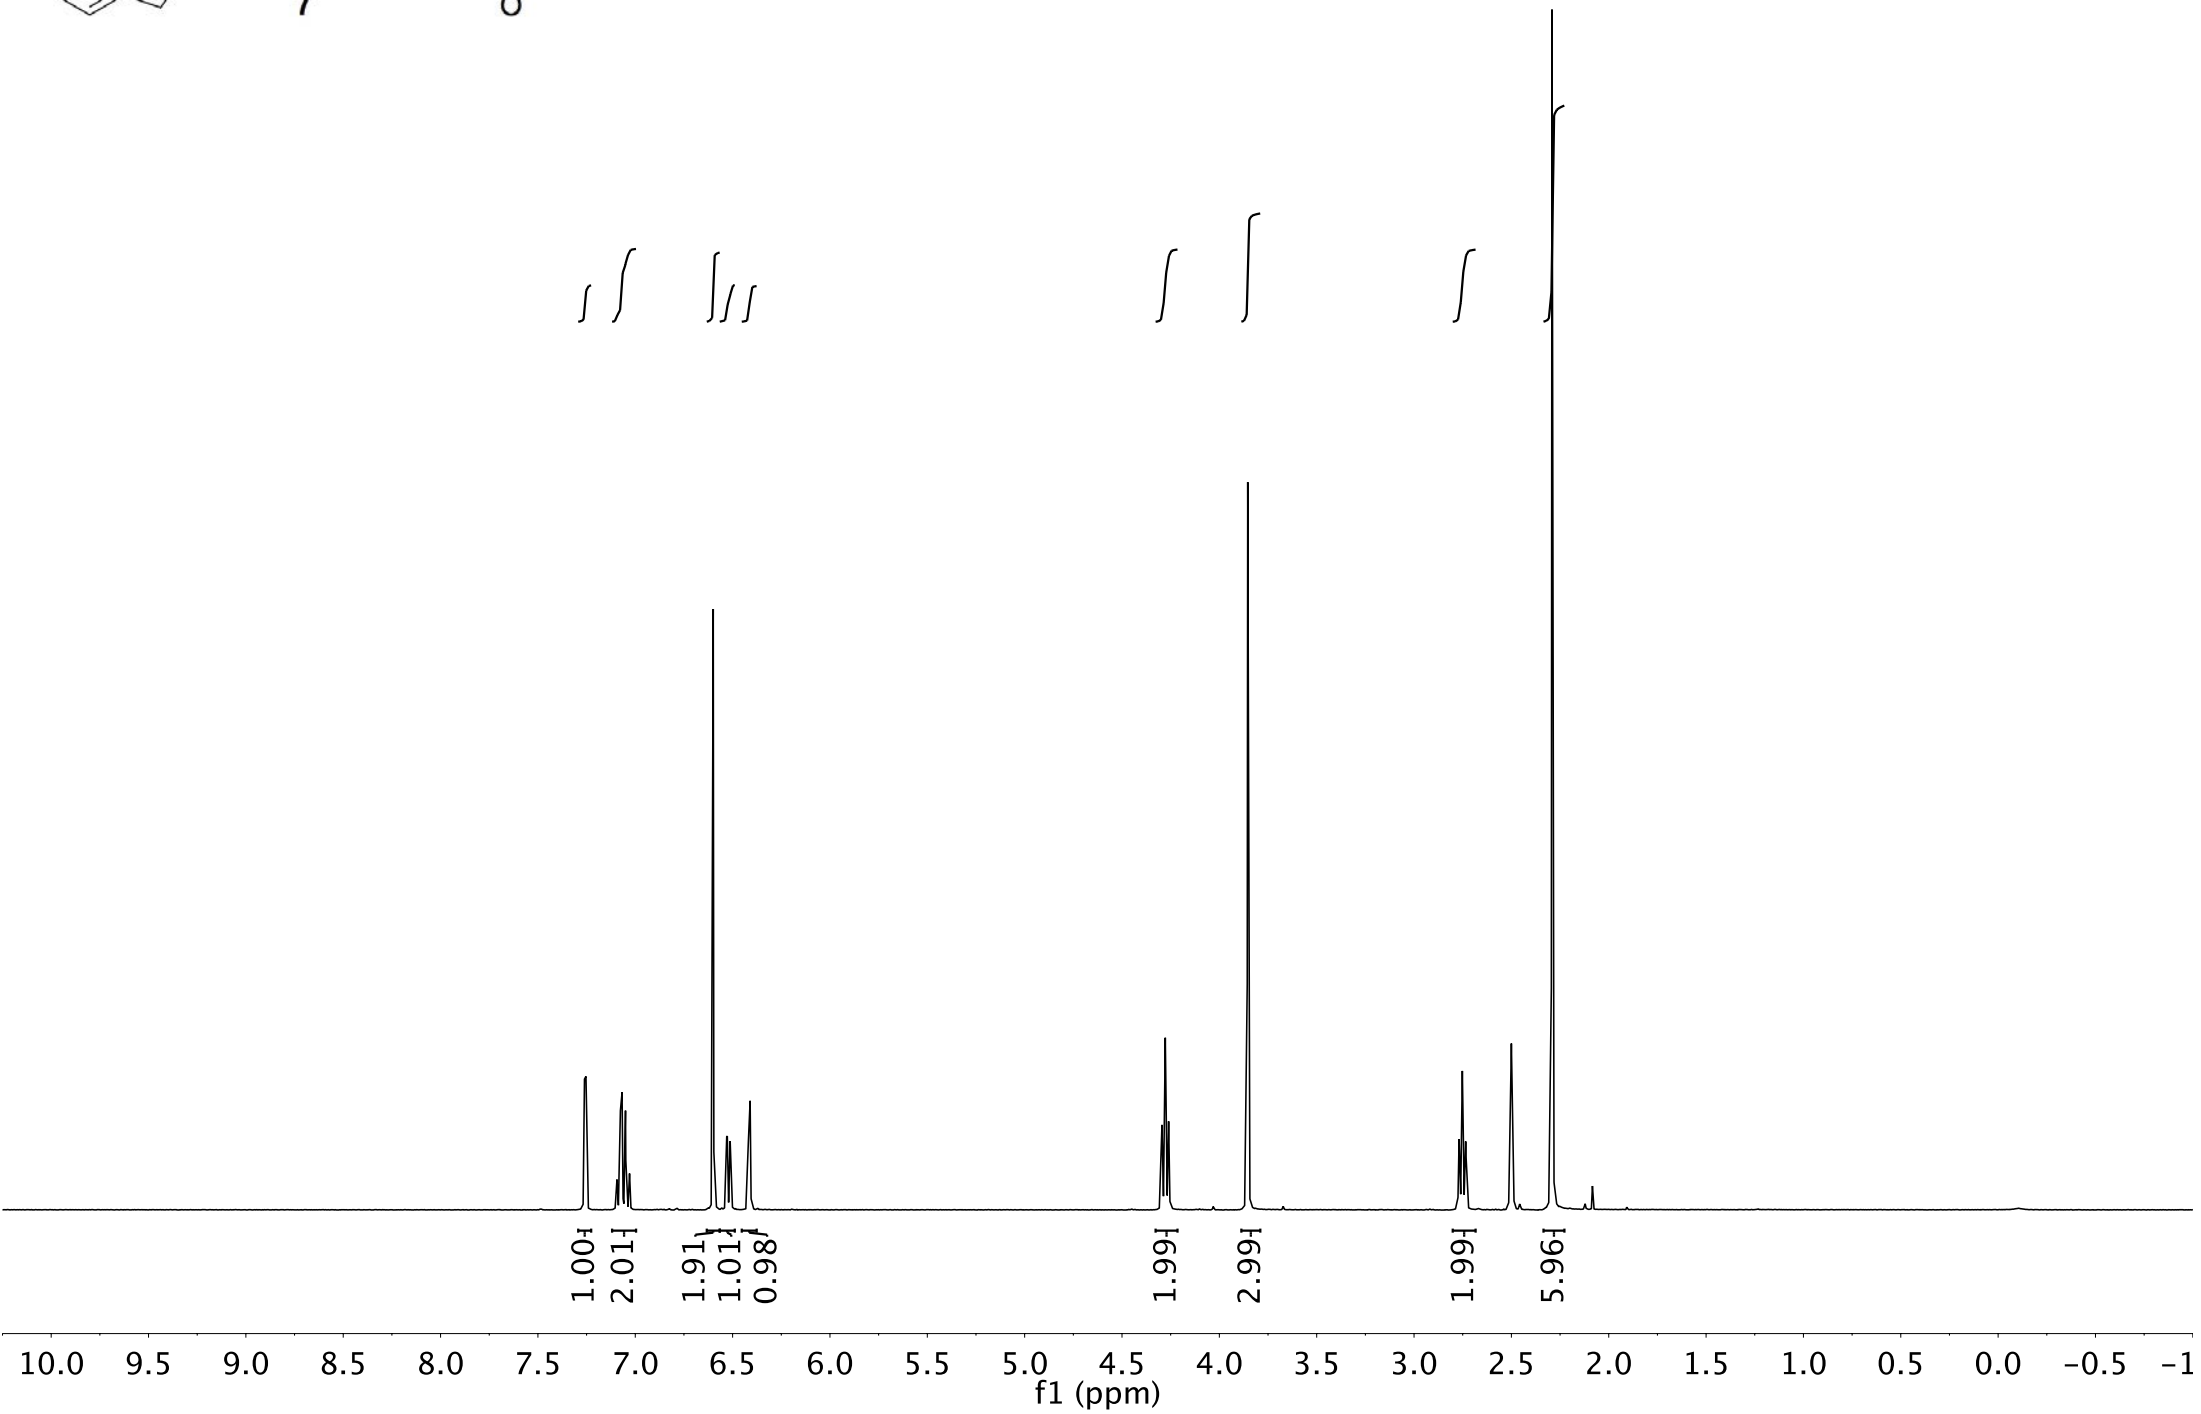

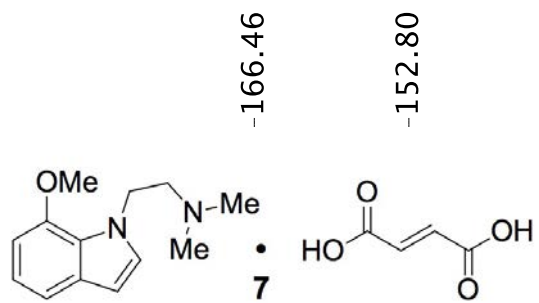

190 180 170 160 150 140 130 120 110 100 90 80 70 60 50 40 30 20 10 0

f1 (ppm)

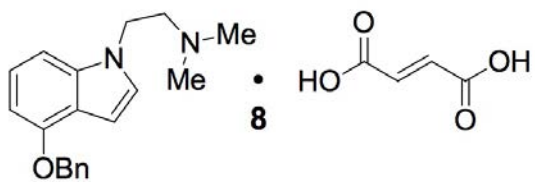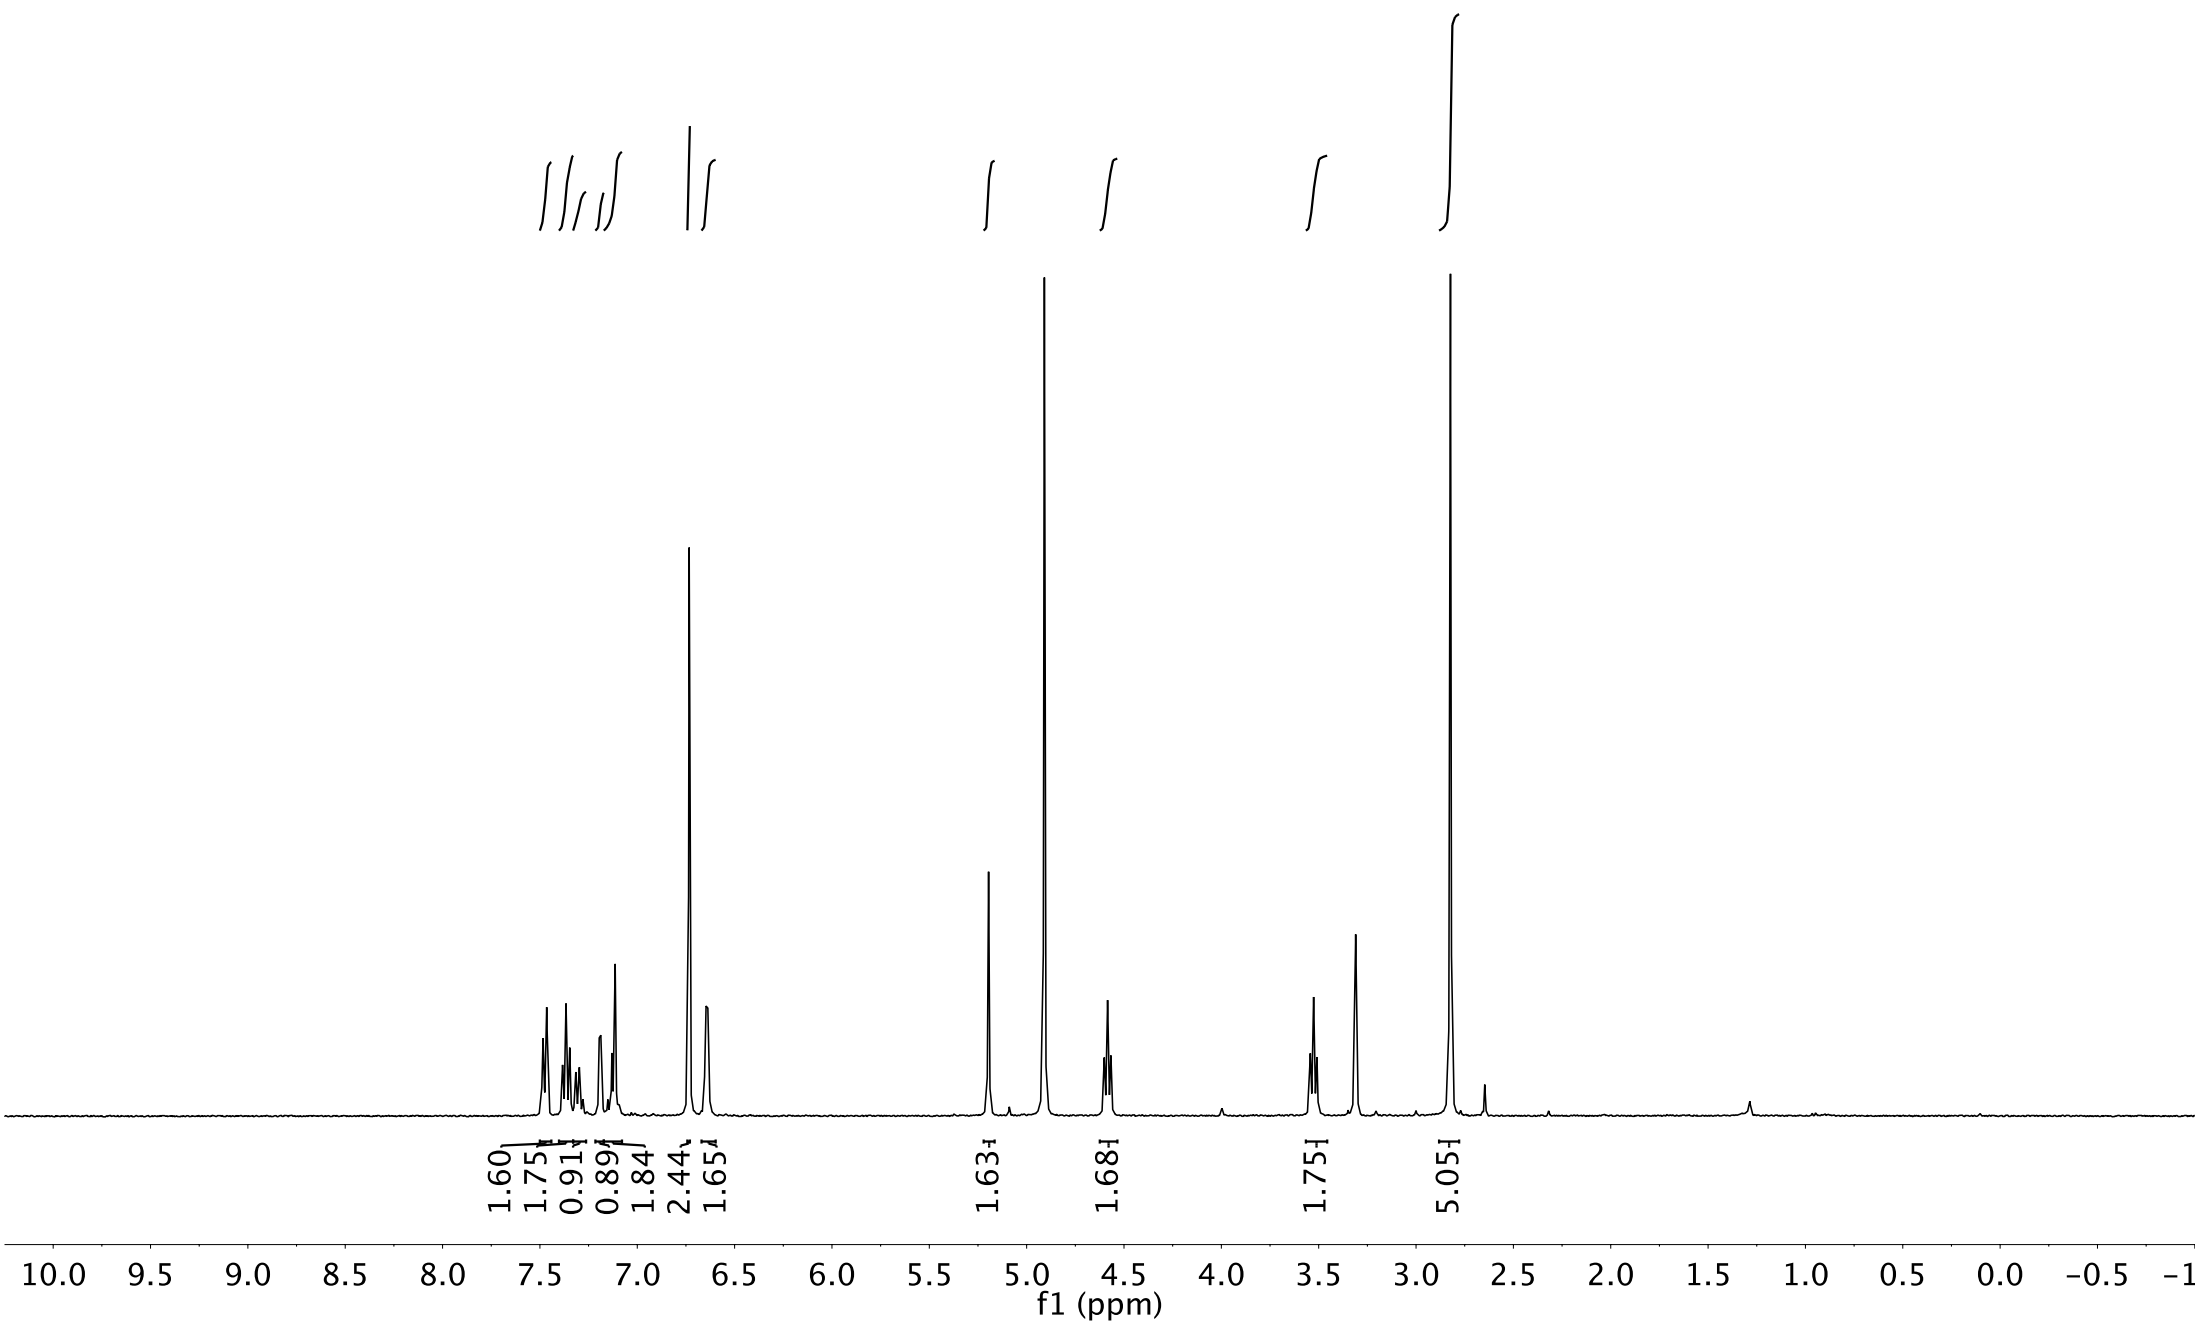

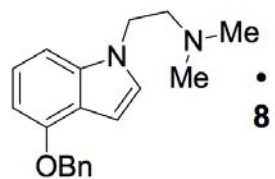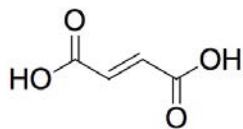

-169.90

-153.99

139.05

138.85

135.75

129.47

128.78

128.47

127.21

124.18

121.16

103.87

102.67

101.07

-70.95

-57.32

43.90

42.46

S18

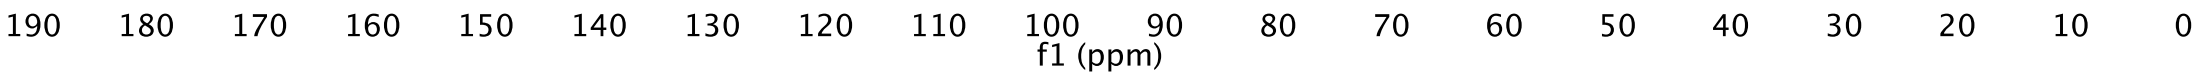

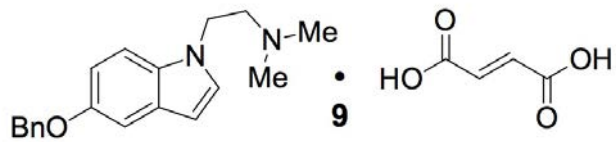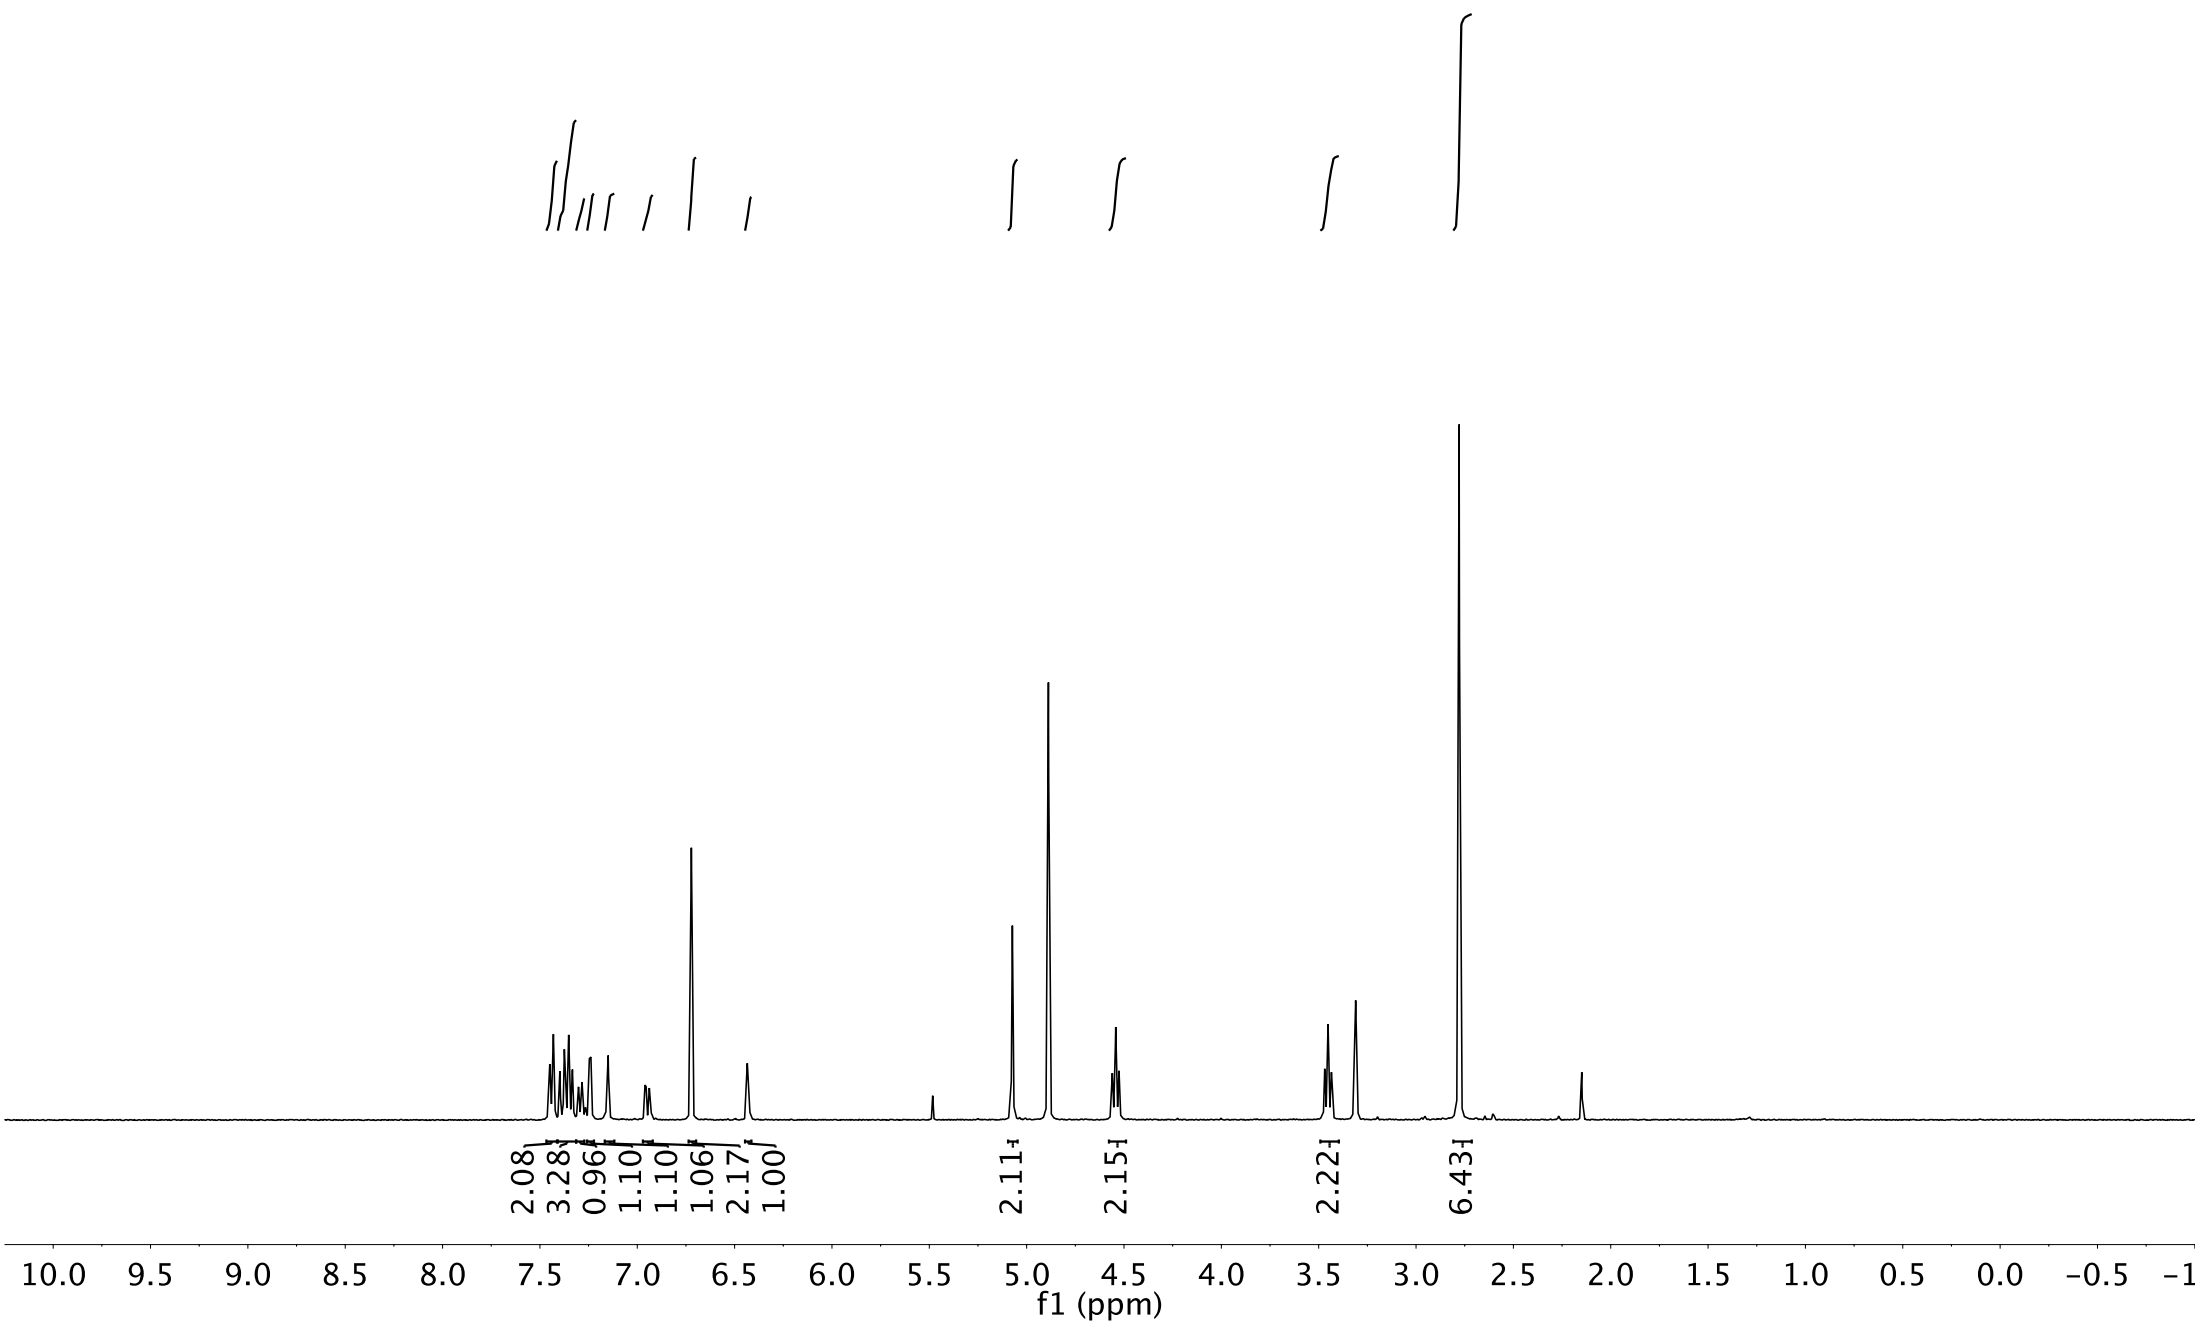

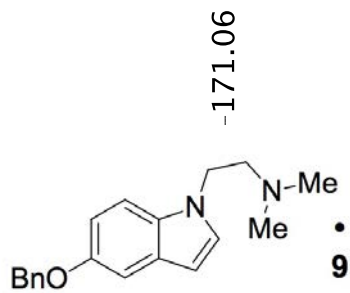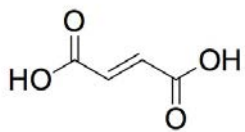

-171.06

-154.78

139.26

136.11

132.77

130.89

130.81

129.44

128.73

128.61

113.97

110.95

105.71

103.24

-71.86

-57.66

44.16

42.77

S20

190 180 170 160 150 140 130 120 110 100 90 80 70 60 50 40 30 20 10 0

f1 (ppm)



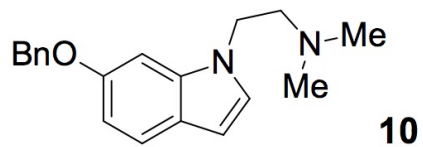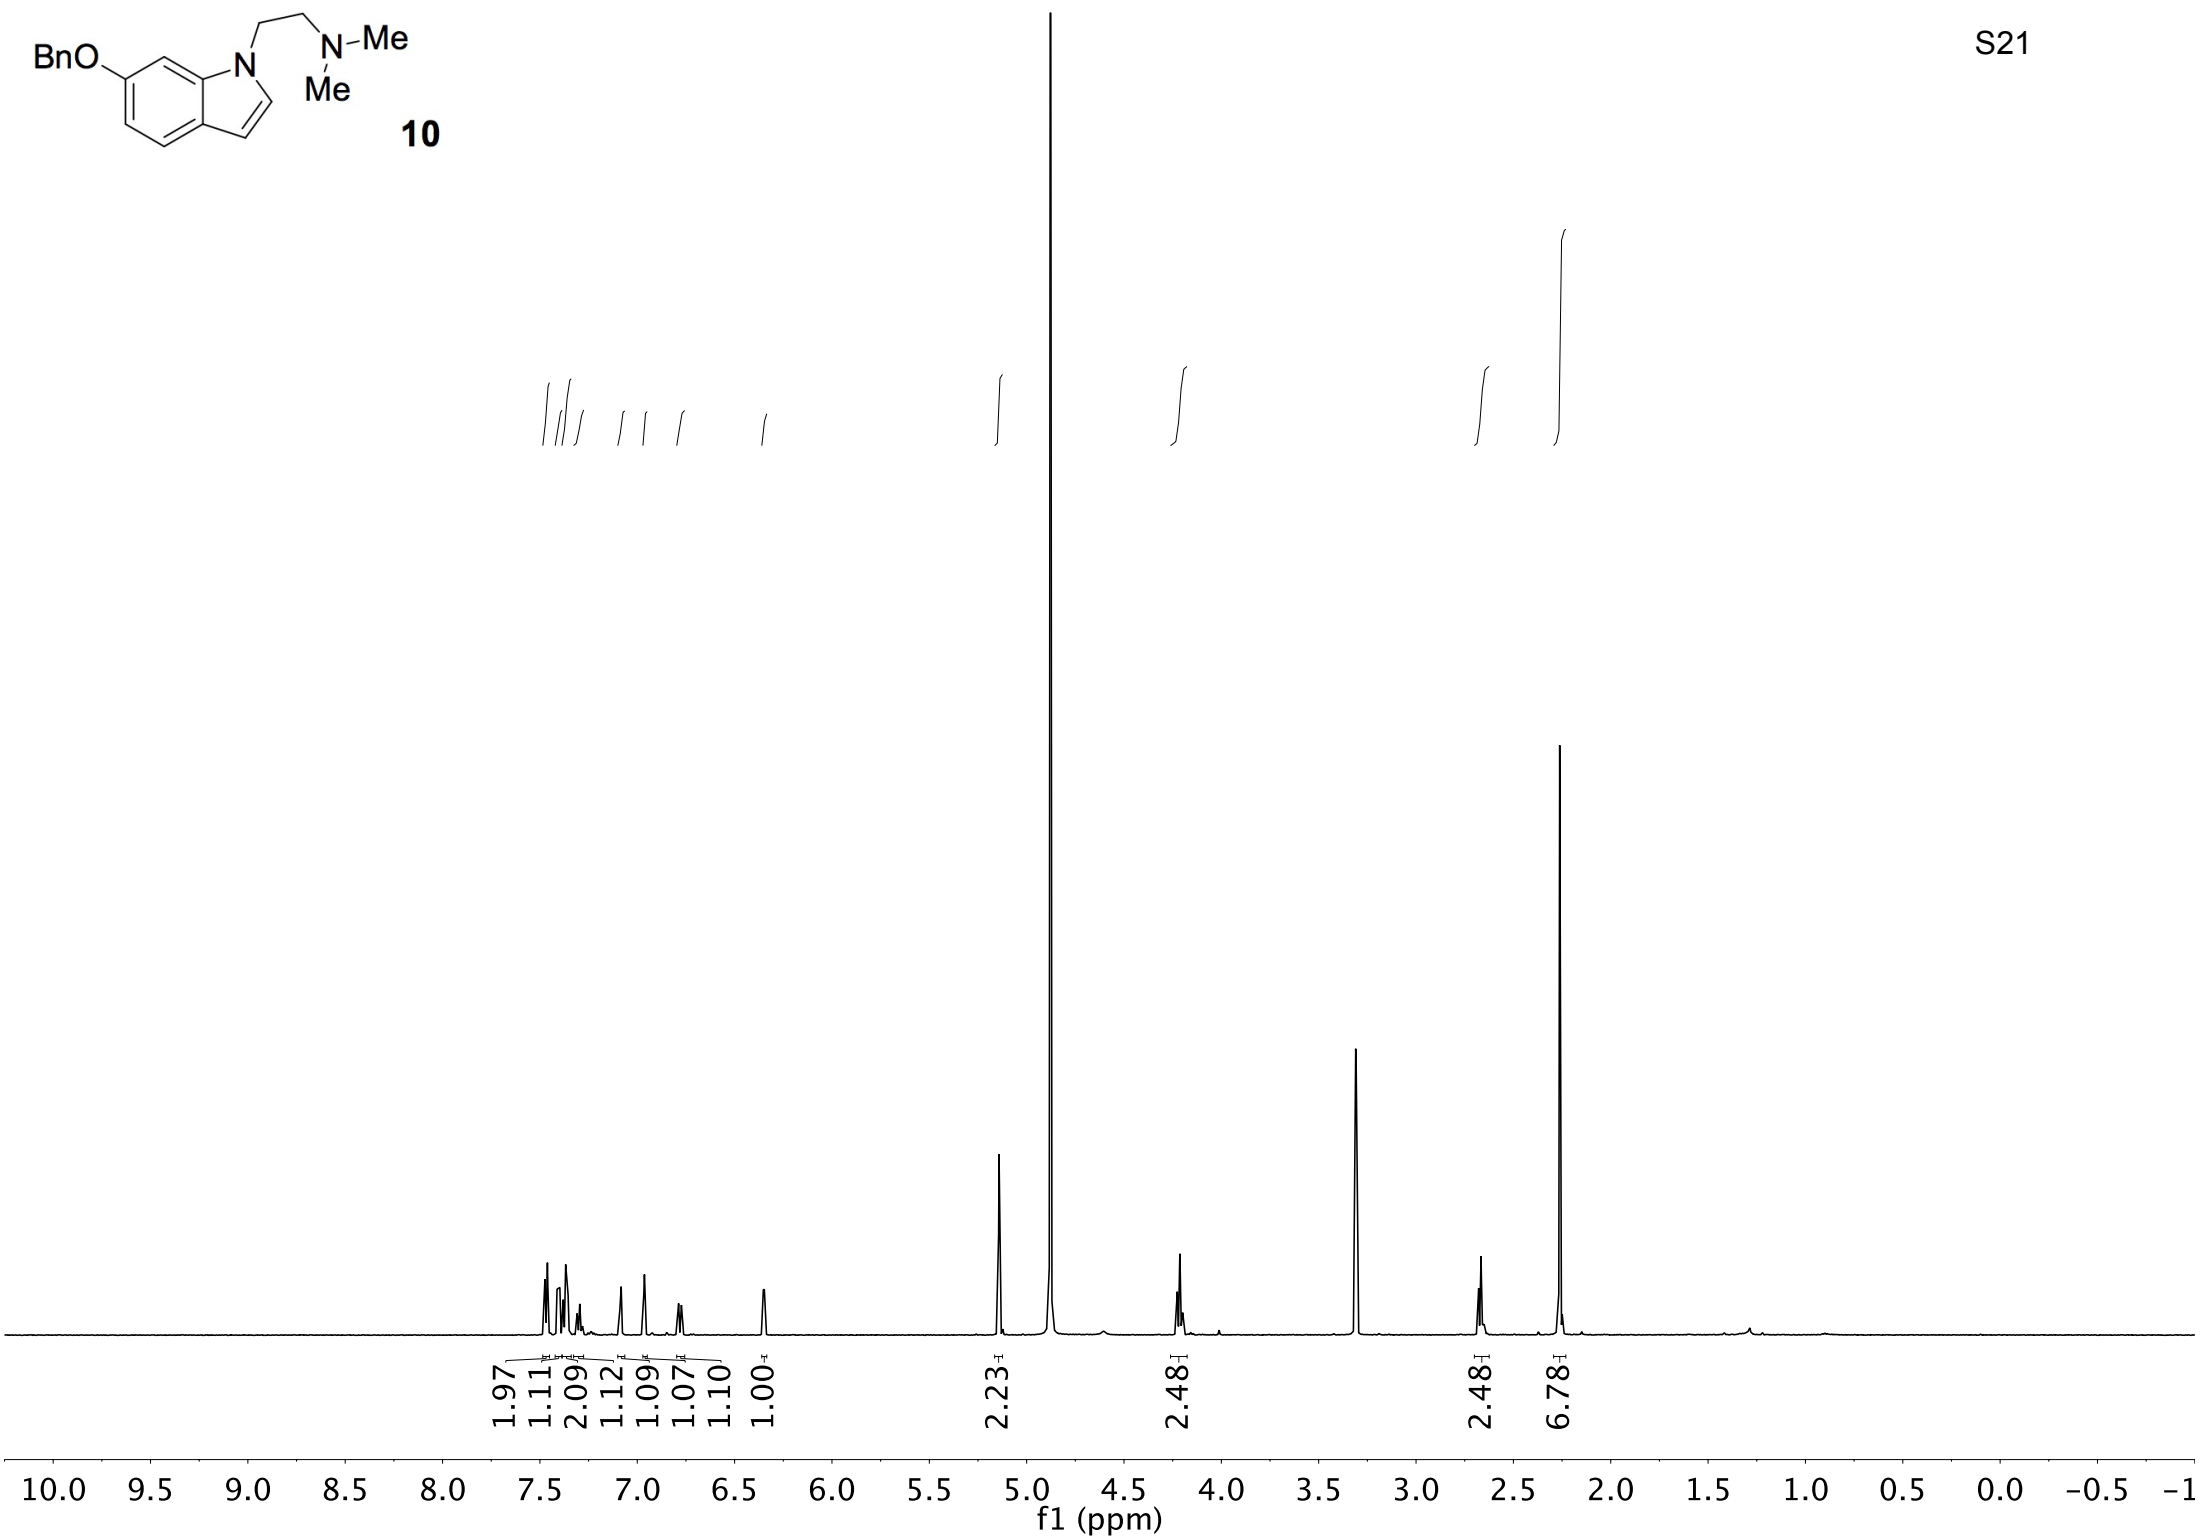

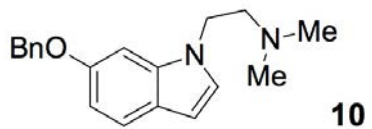

-155.39

137.60

136.66

128.69

127.97

127.67

127.22

123.24

121.68

-109.95

-101.31

-94.71

-70.87

-58.92

45.91

44.90

S22

190 180 170 160 150 140 130 120 110 100 90 80 70 60 50 40 30 20 10 0

f1 (ppm)

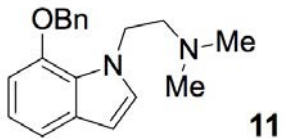

S23

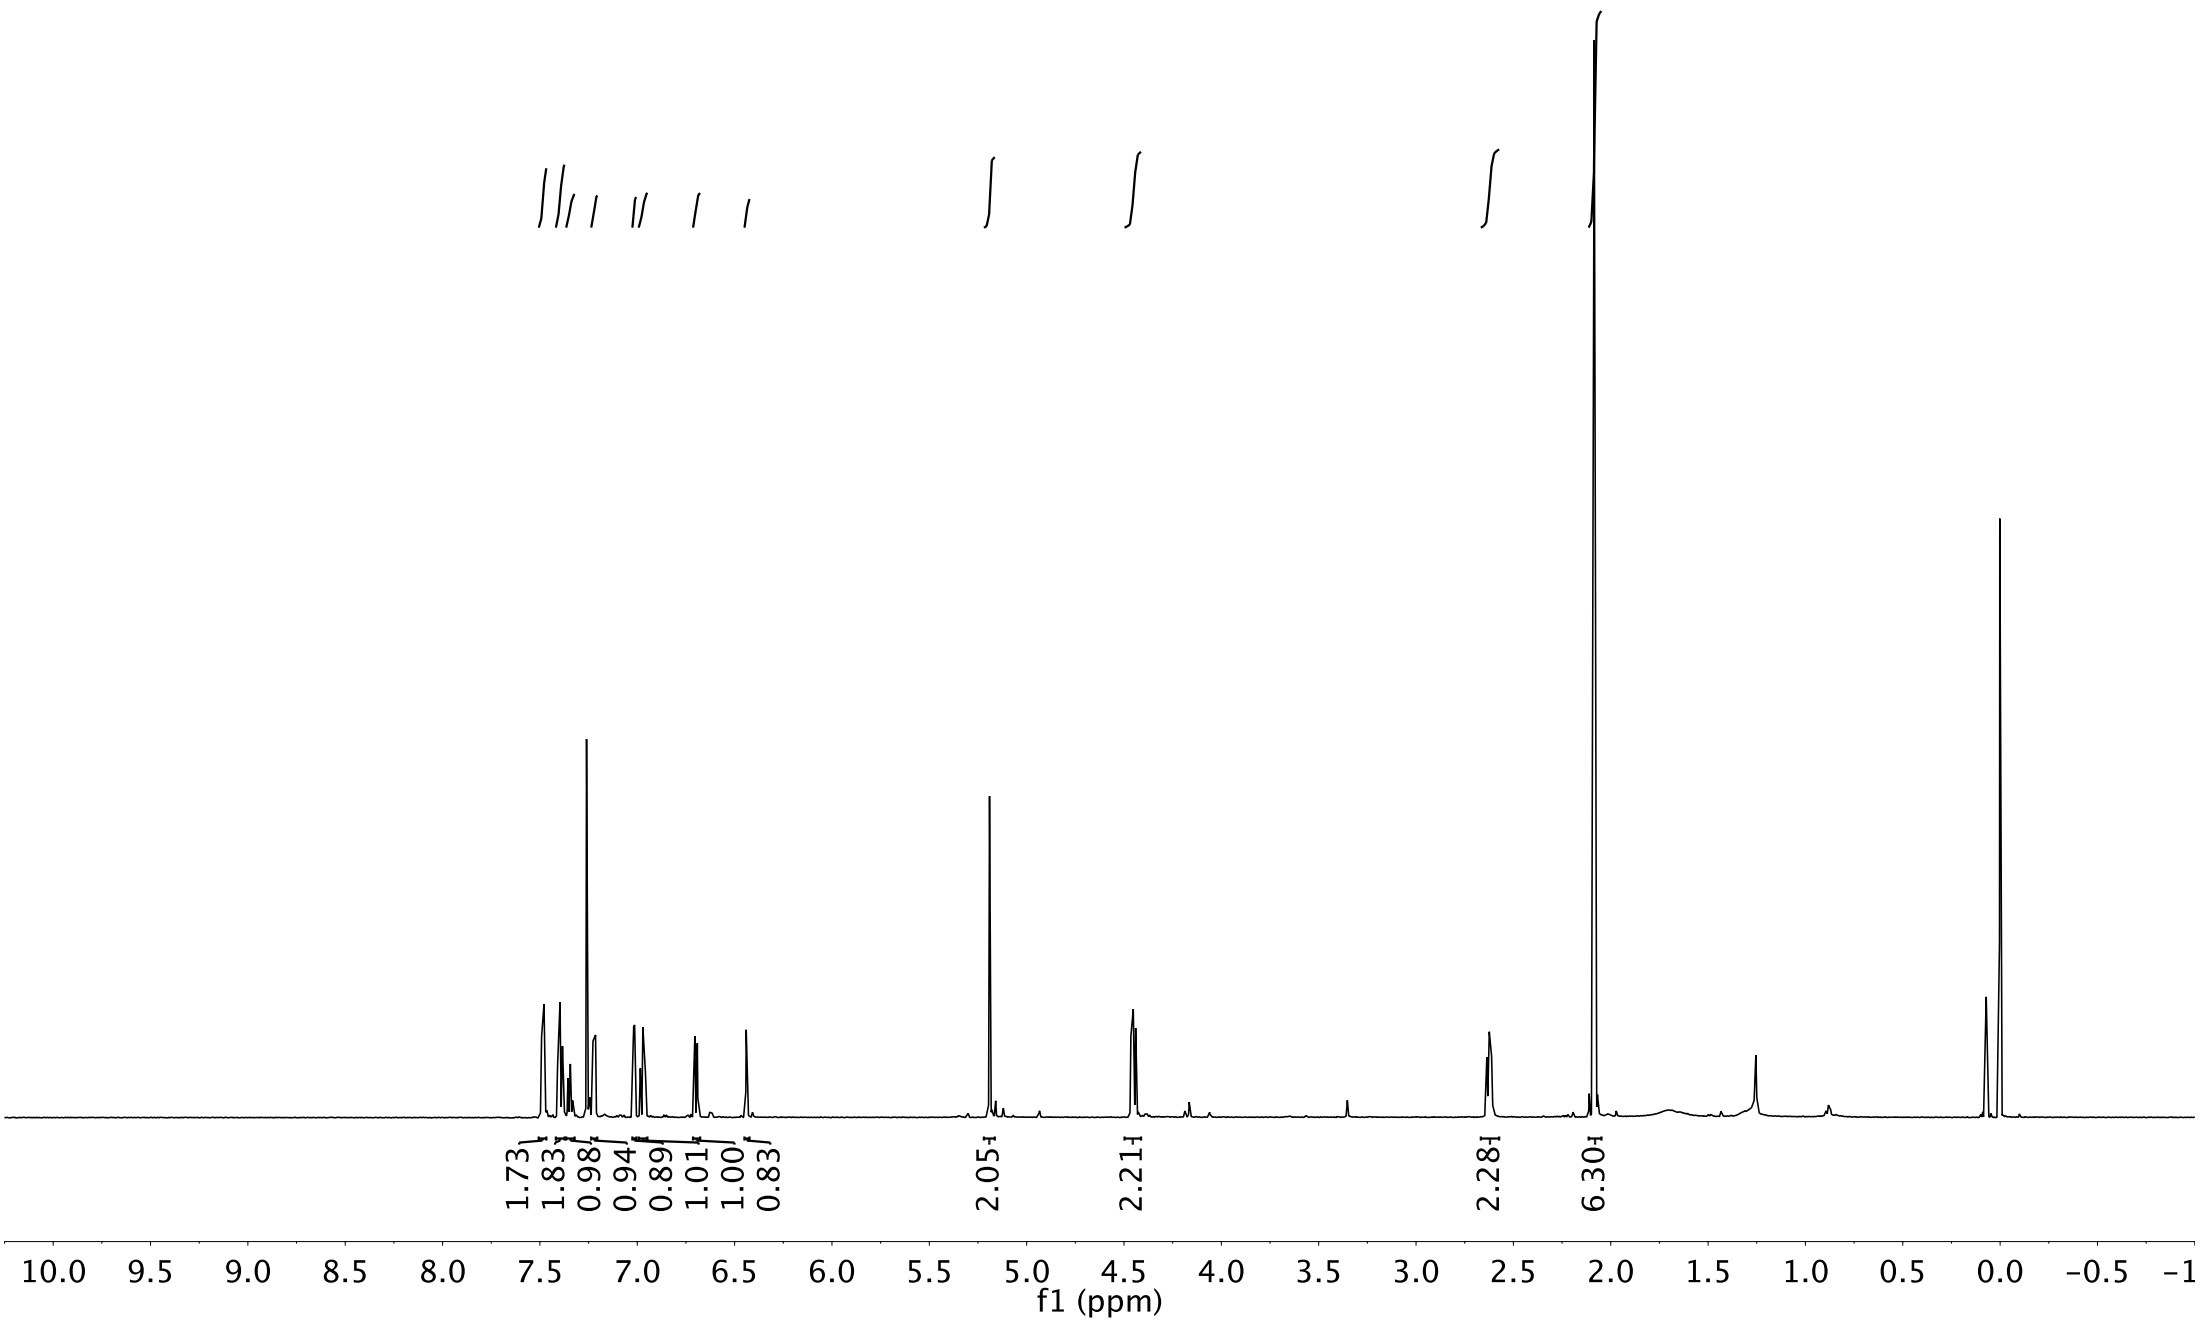

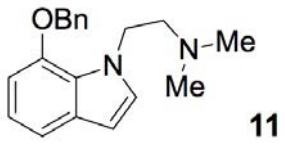

-150.59  
-146.71  
137.11  
131.25  
129.45  
128.75  
128.24  
128.15  
-119.82  
-114.16  
103.35  
101.60

-70.55

-61.02

47.54

45.64

S24

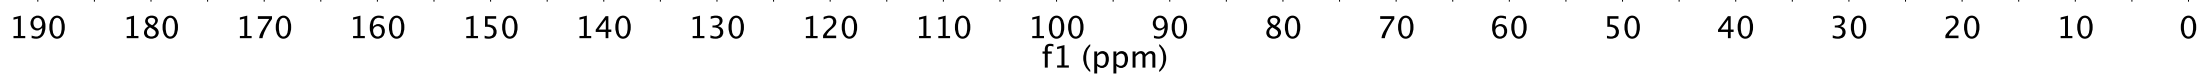

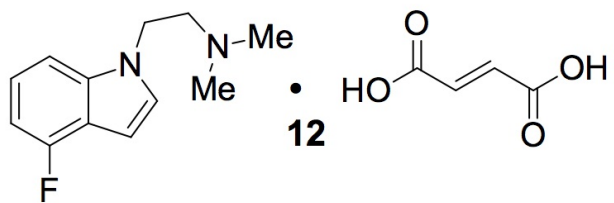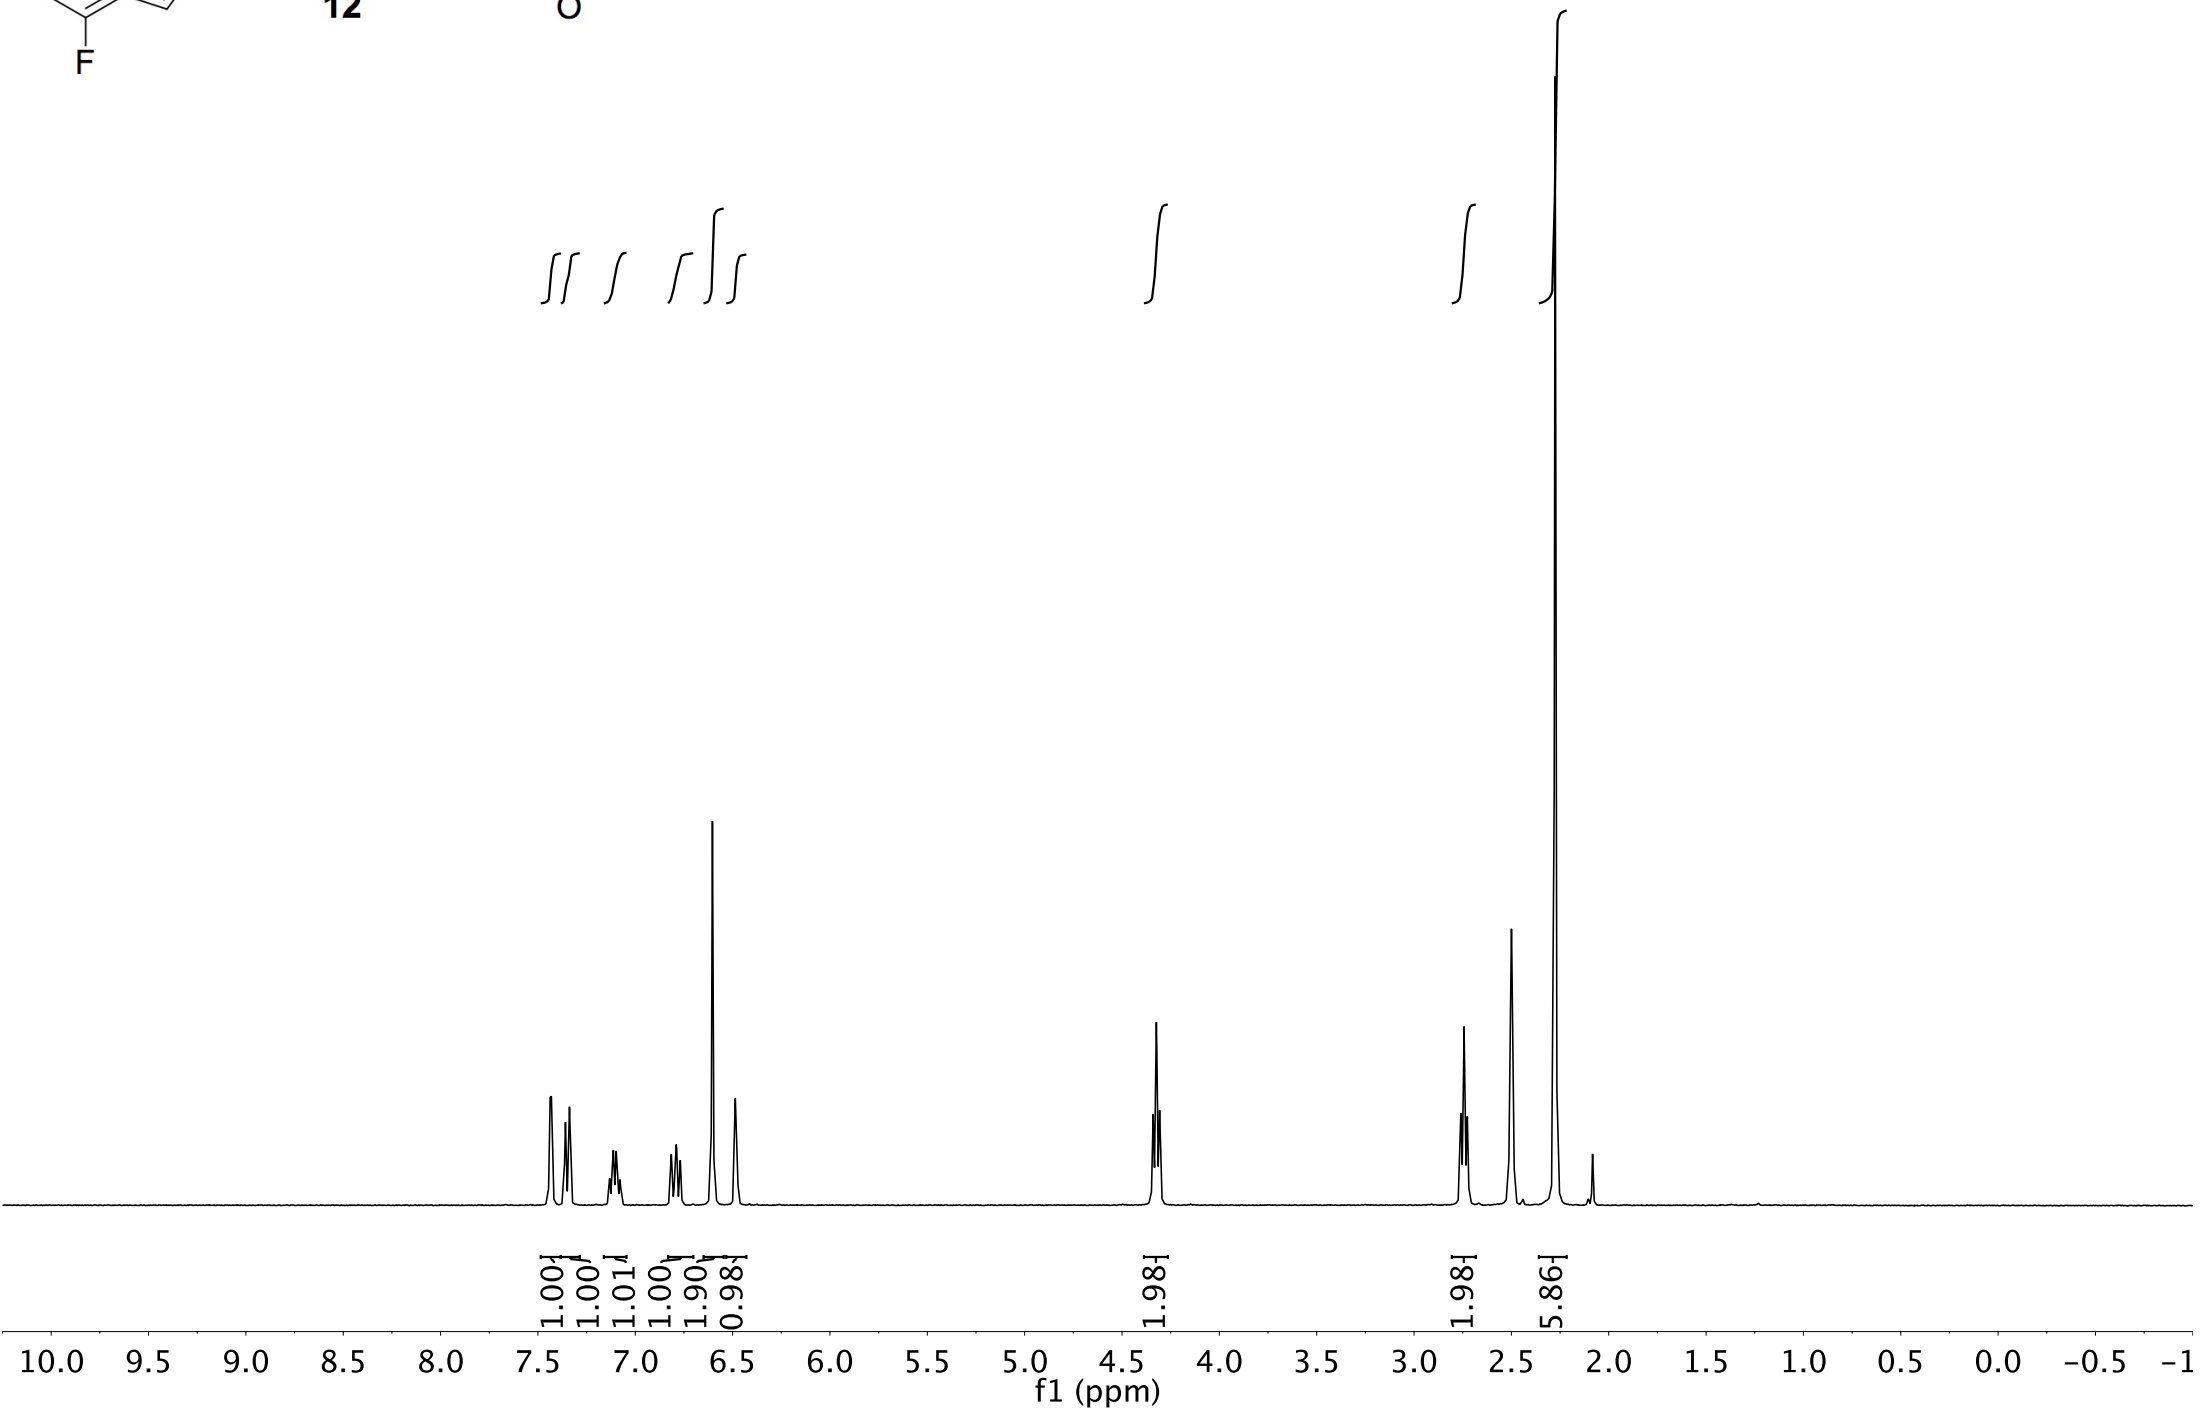

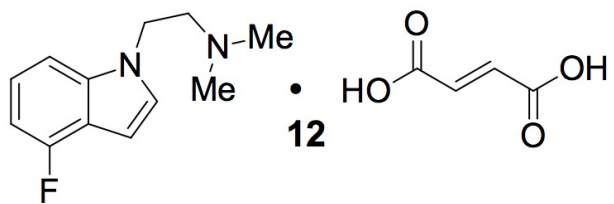

-166.37  
-156.77  
-154.34  
138.56  
138.44  
134.21  
129.35  
121.63  
121.55  
116.74  
116.51  
106.48  
106.45  
103.70  
103.51  
-96.24

-57.90

44.73  
43.40

S26

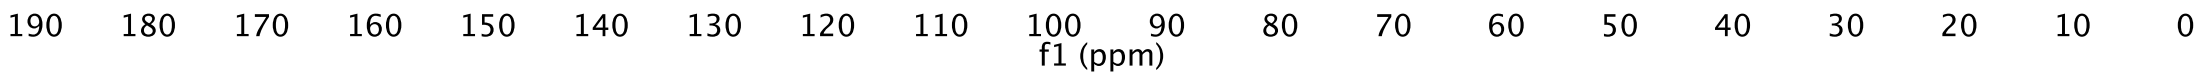

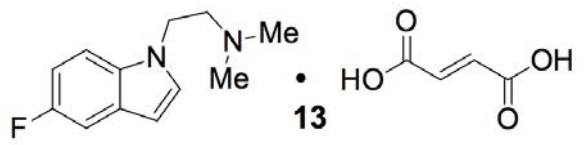

S27

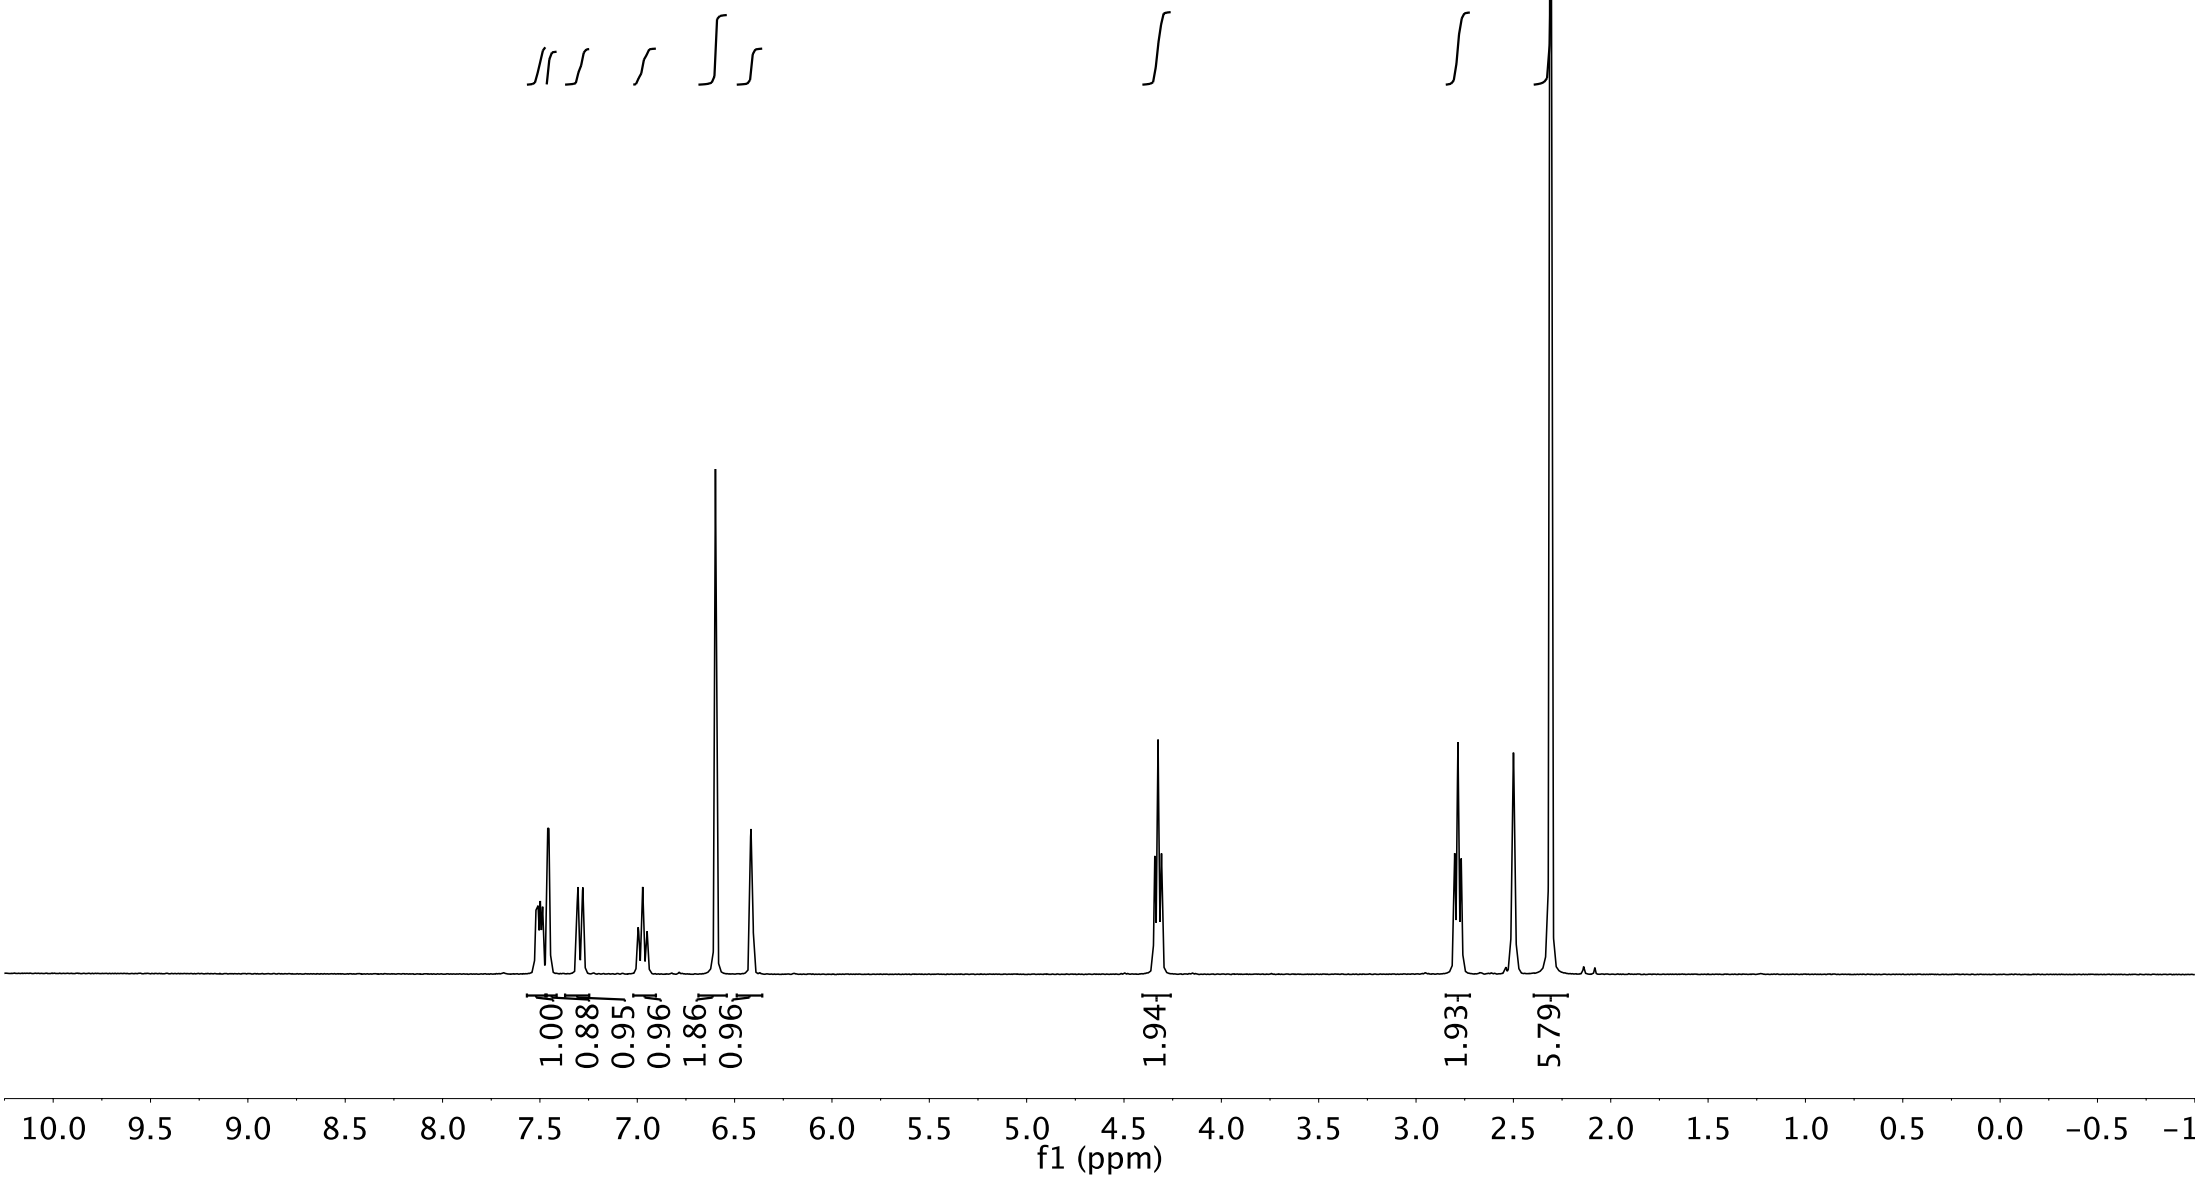

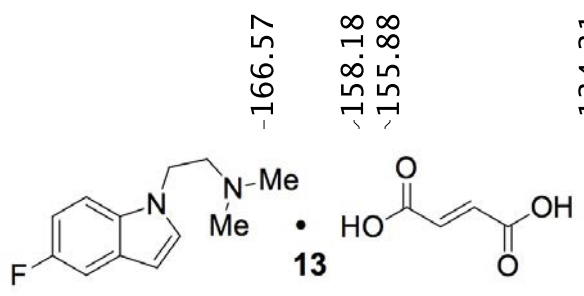

-166.57  
-158.18  
-155.88  
134.31  
132.46  
130.71  
128.33  
128.23  
110.82  
110.72  
109.23  
108.97  
105.05  
104.82  
100.77  
100.73  
-57.71  
44.52  
43.08

S28





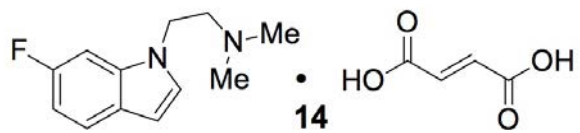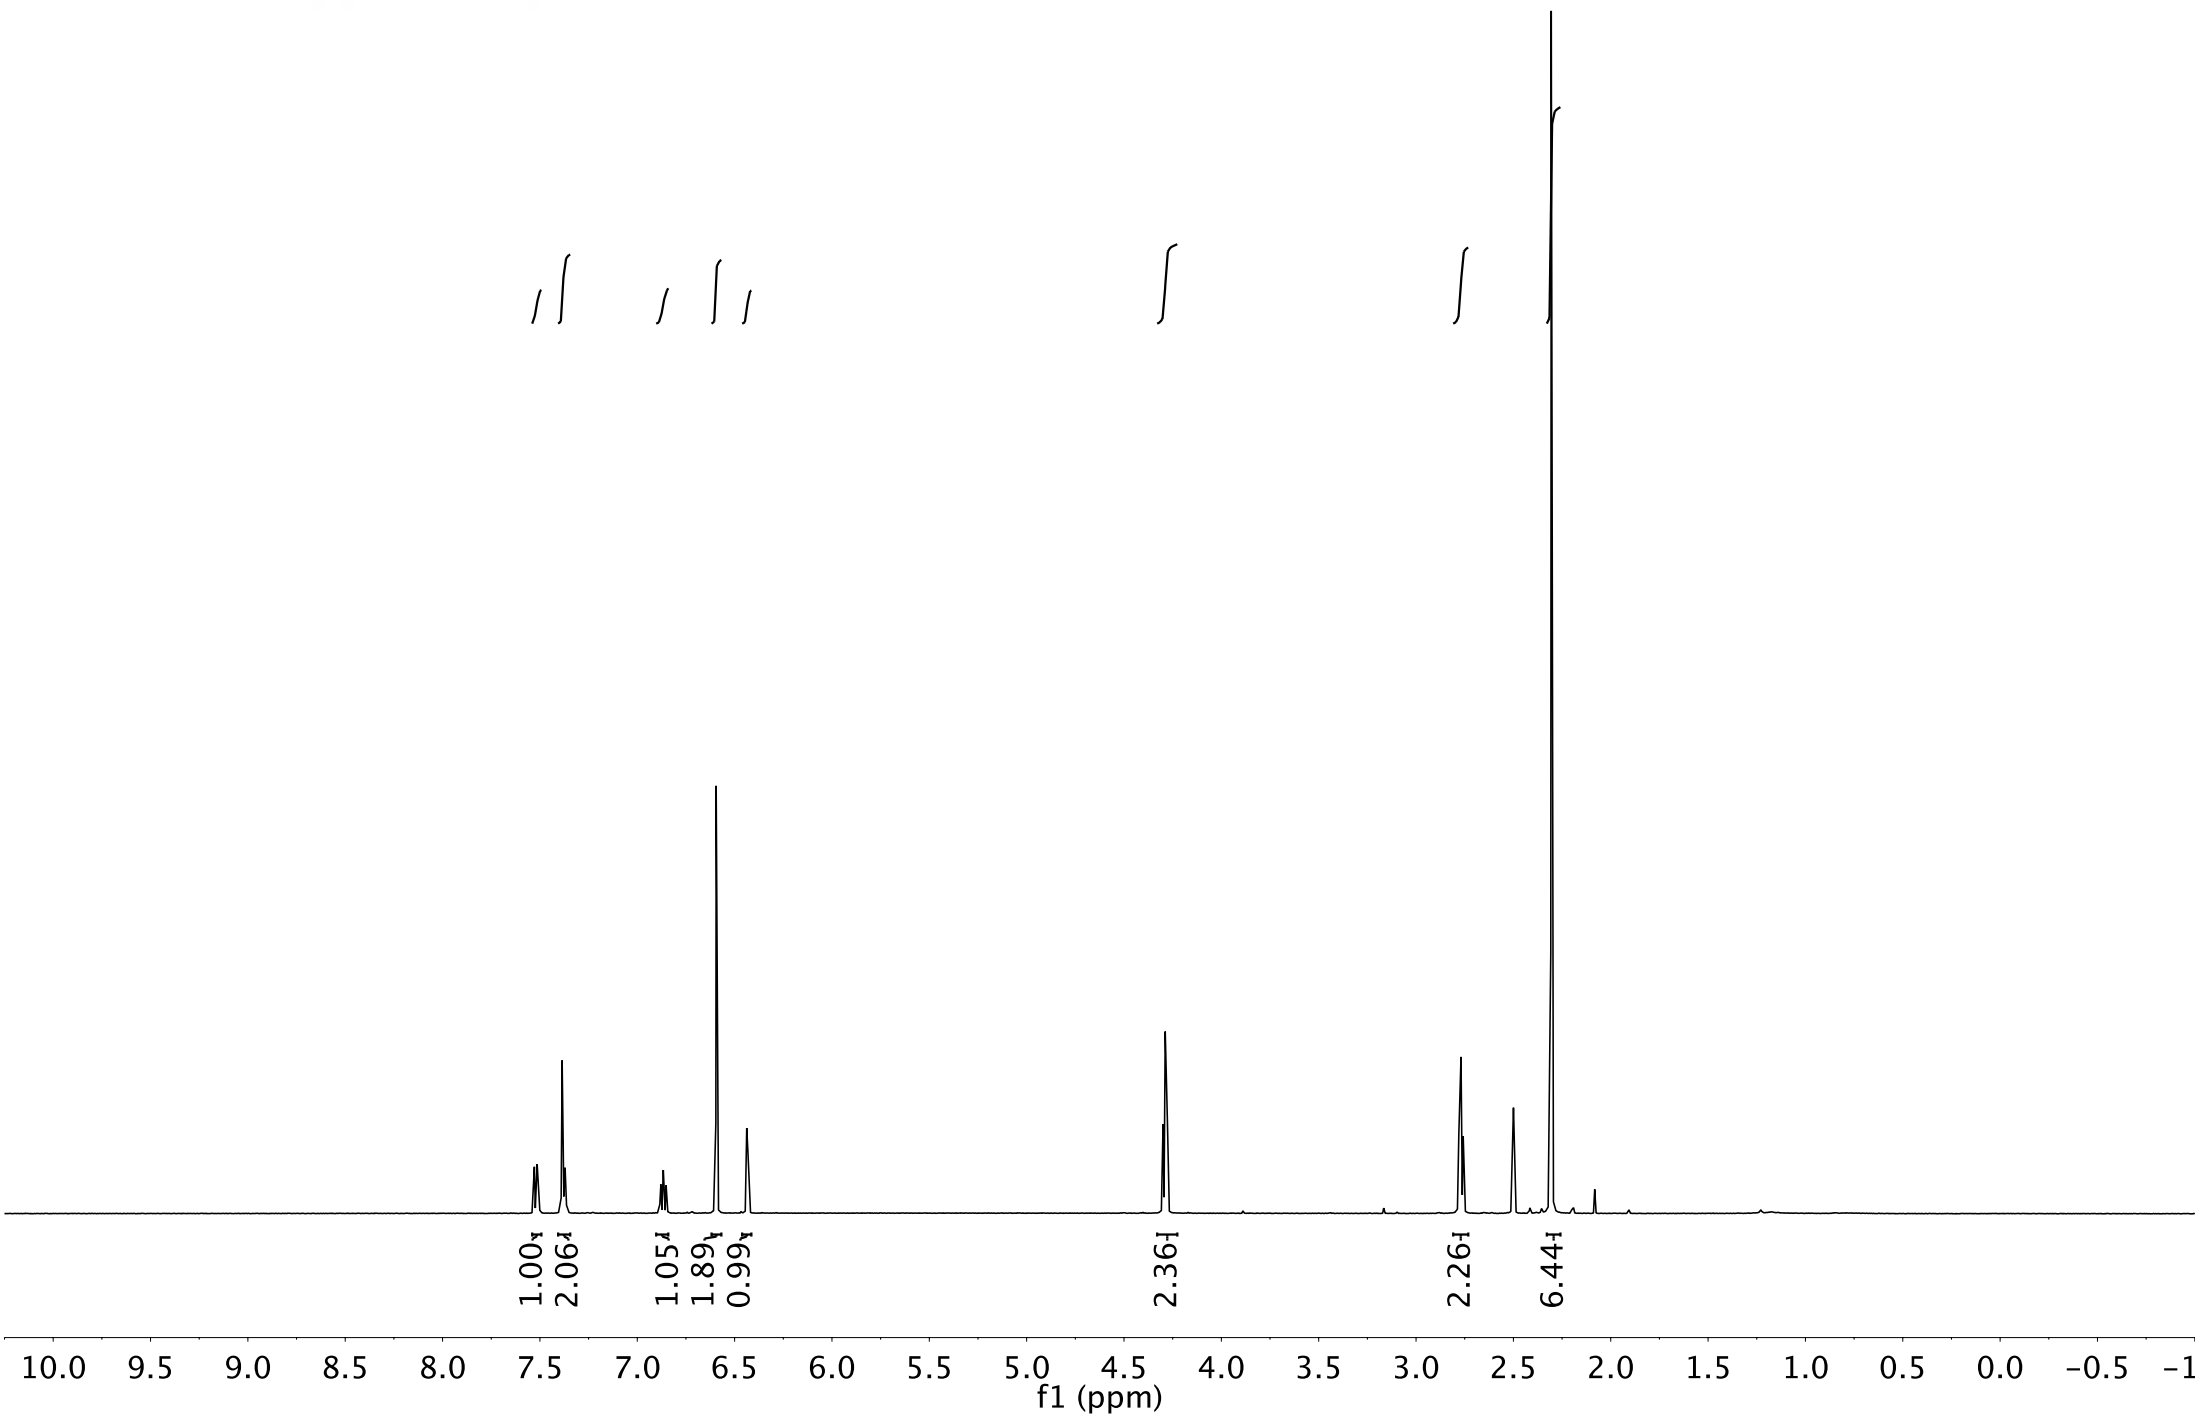

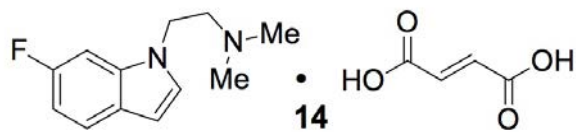

-166.59  
 159.61  
 158.06  
 135.77  
 135.69  
 134.33  
 129.54  
 129.51  
 124.72  
 121.39  
 121.32  
 107.48  
 107.32  
 100.97  
 96.32  
 96.15

-57.66

44.58  
43.00

S30

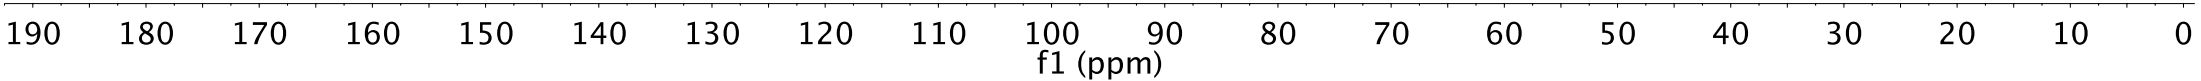

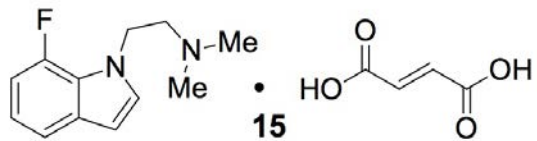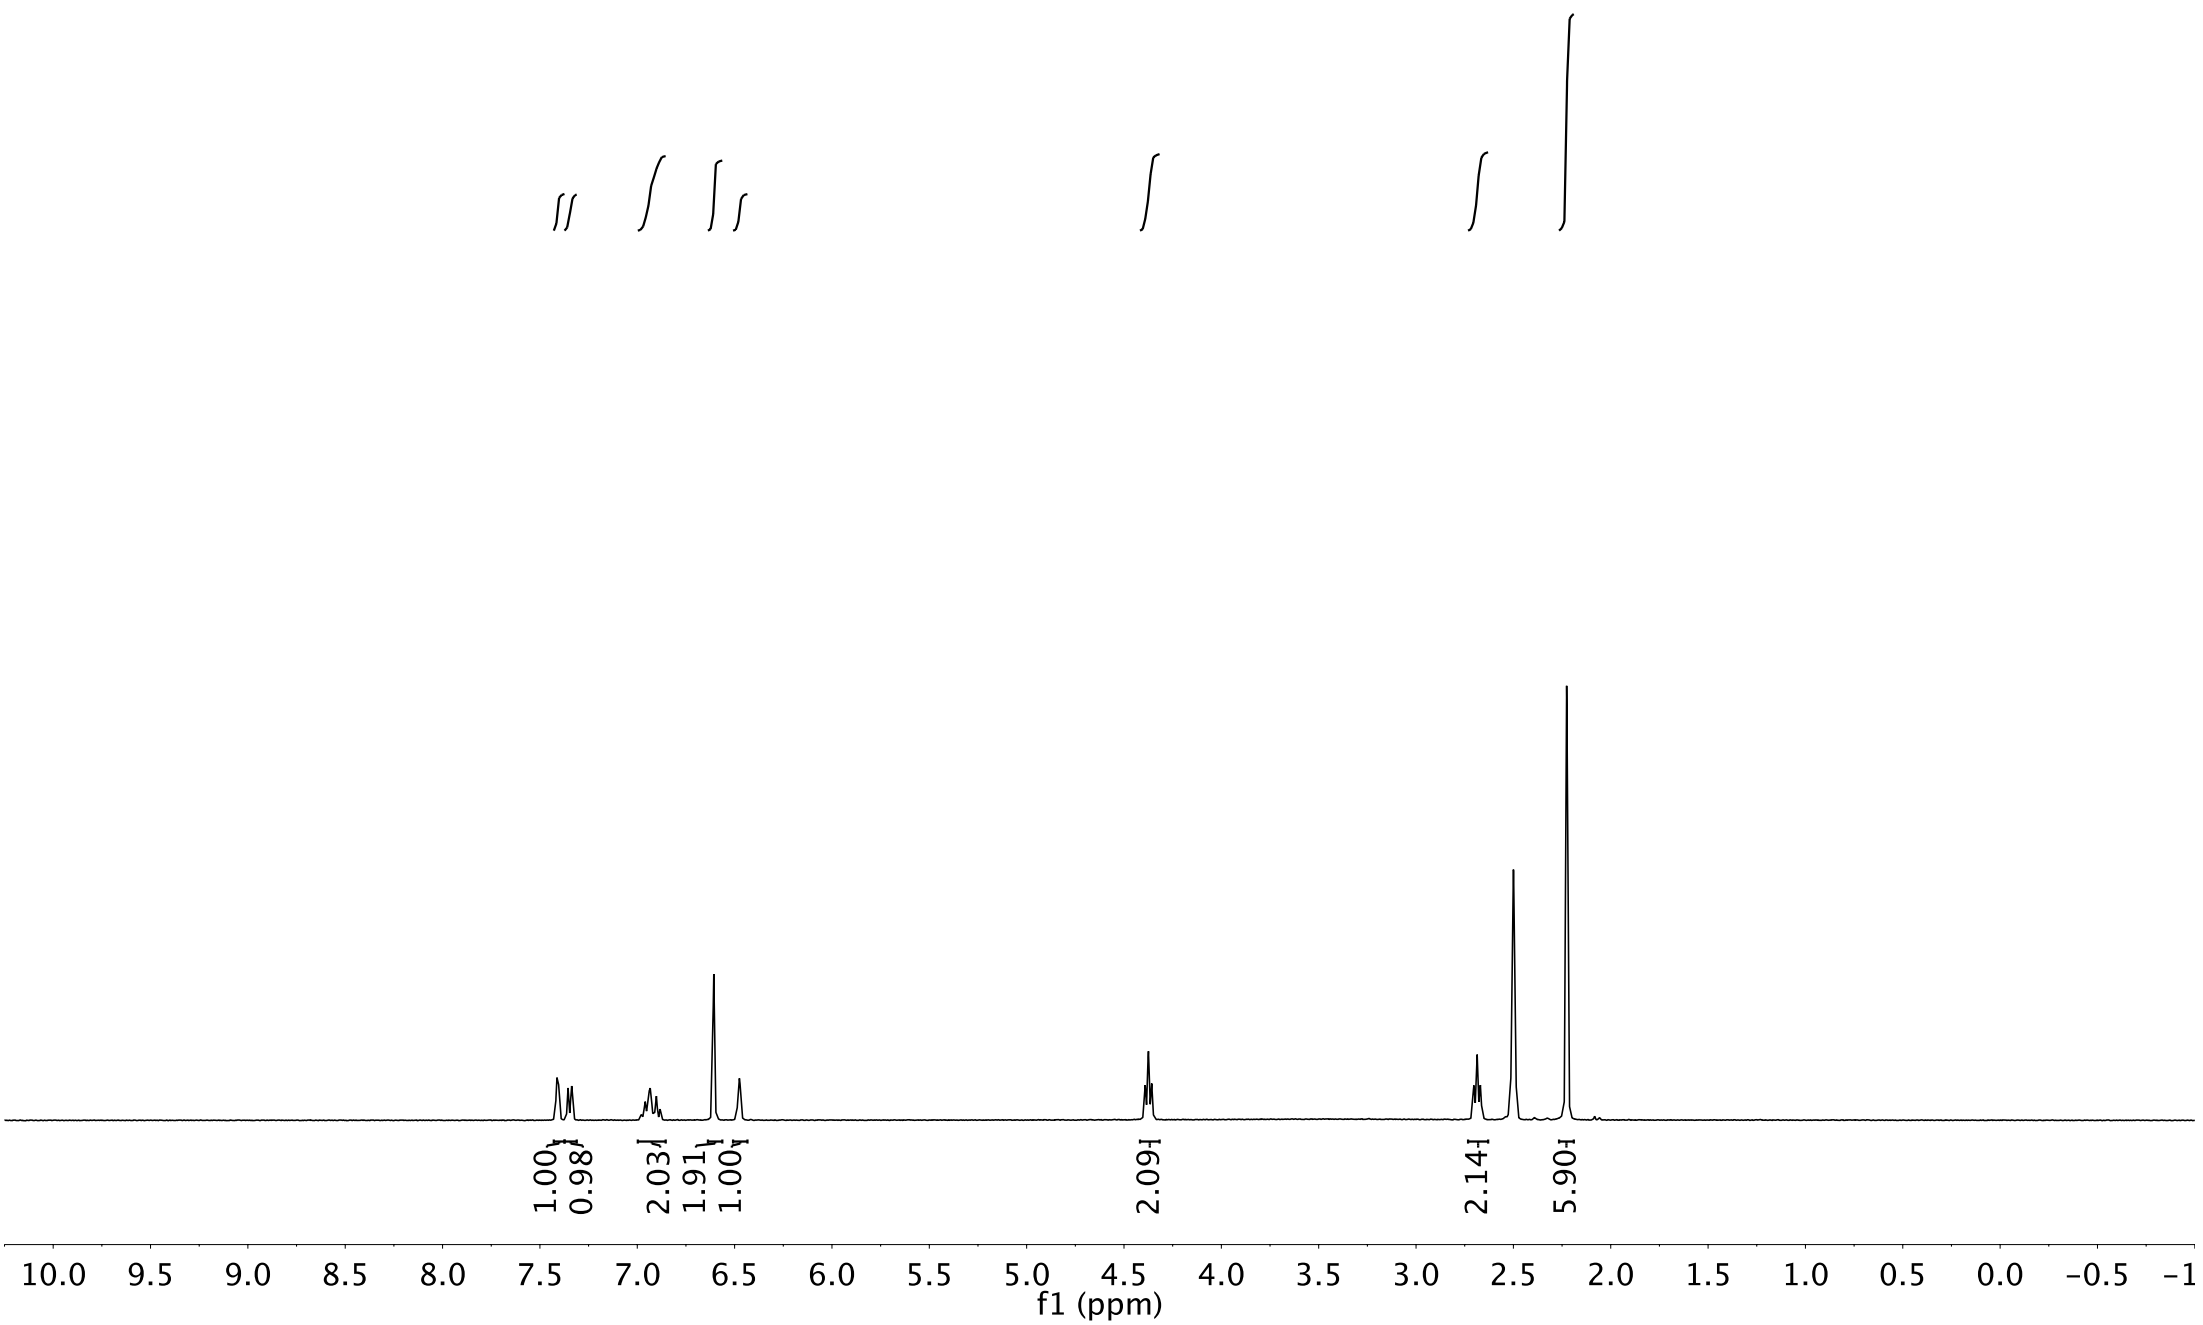

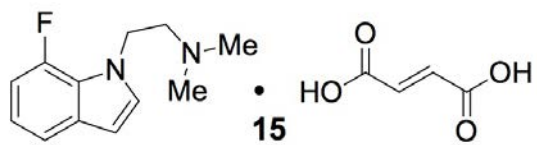

-169.37

134.60

133.26

129.51

119.90

119.46

116.82

116.79

107.06

106.88

102.78

-57.61

43.71

43.67

42.90

S32

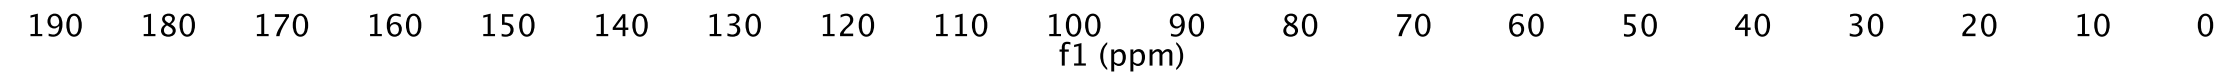

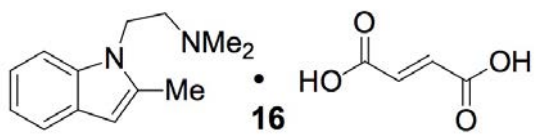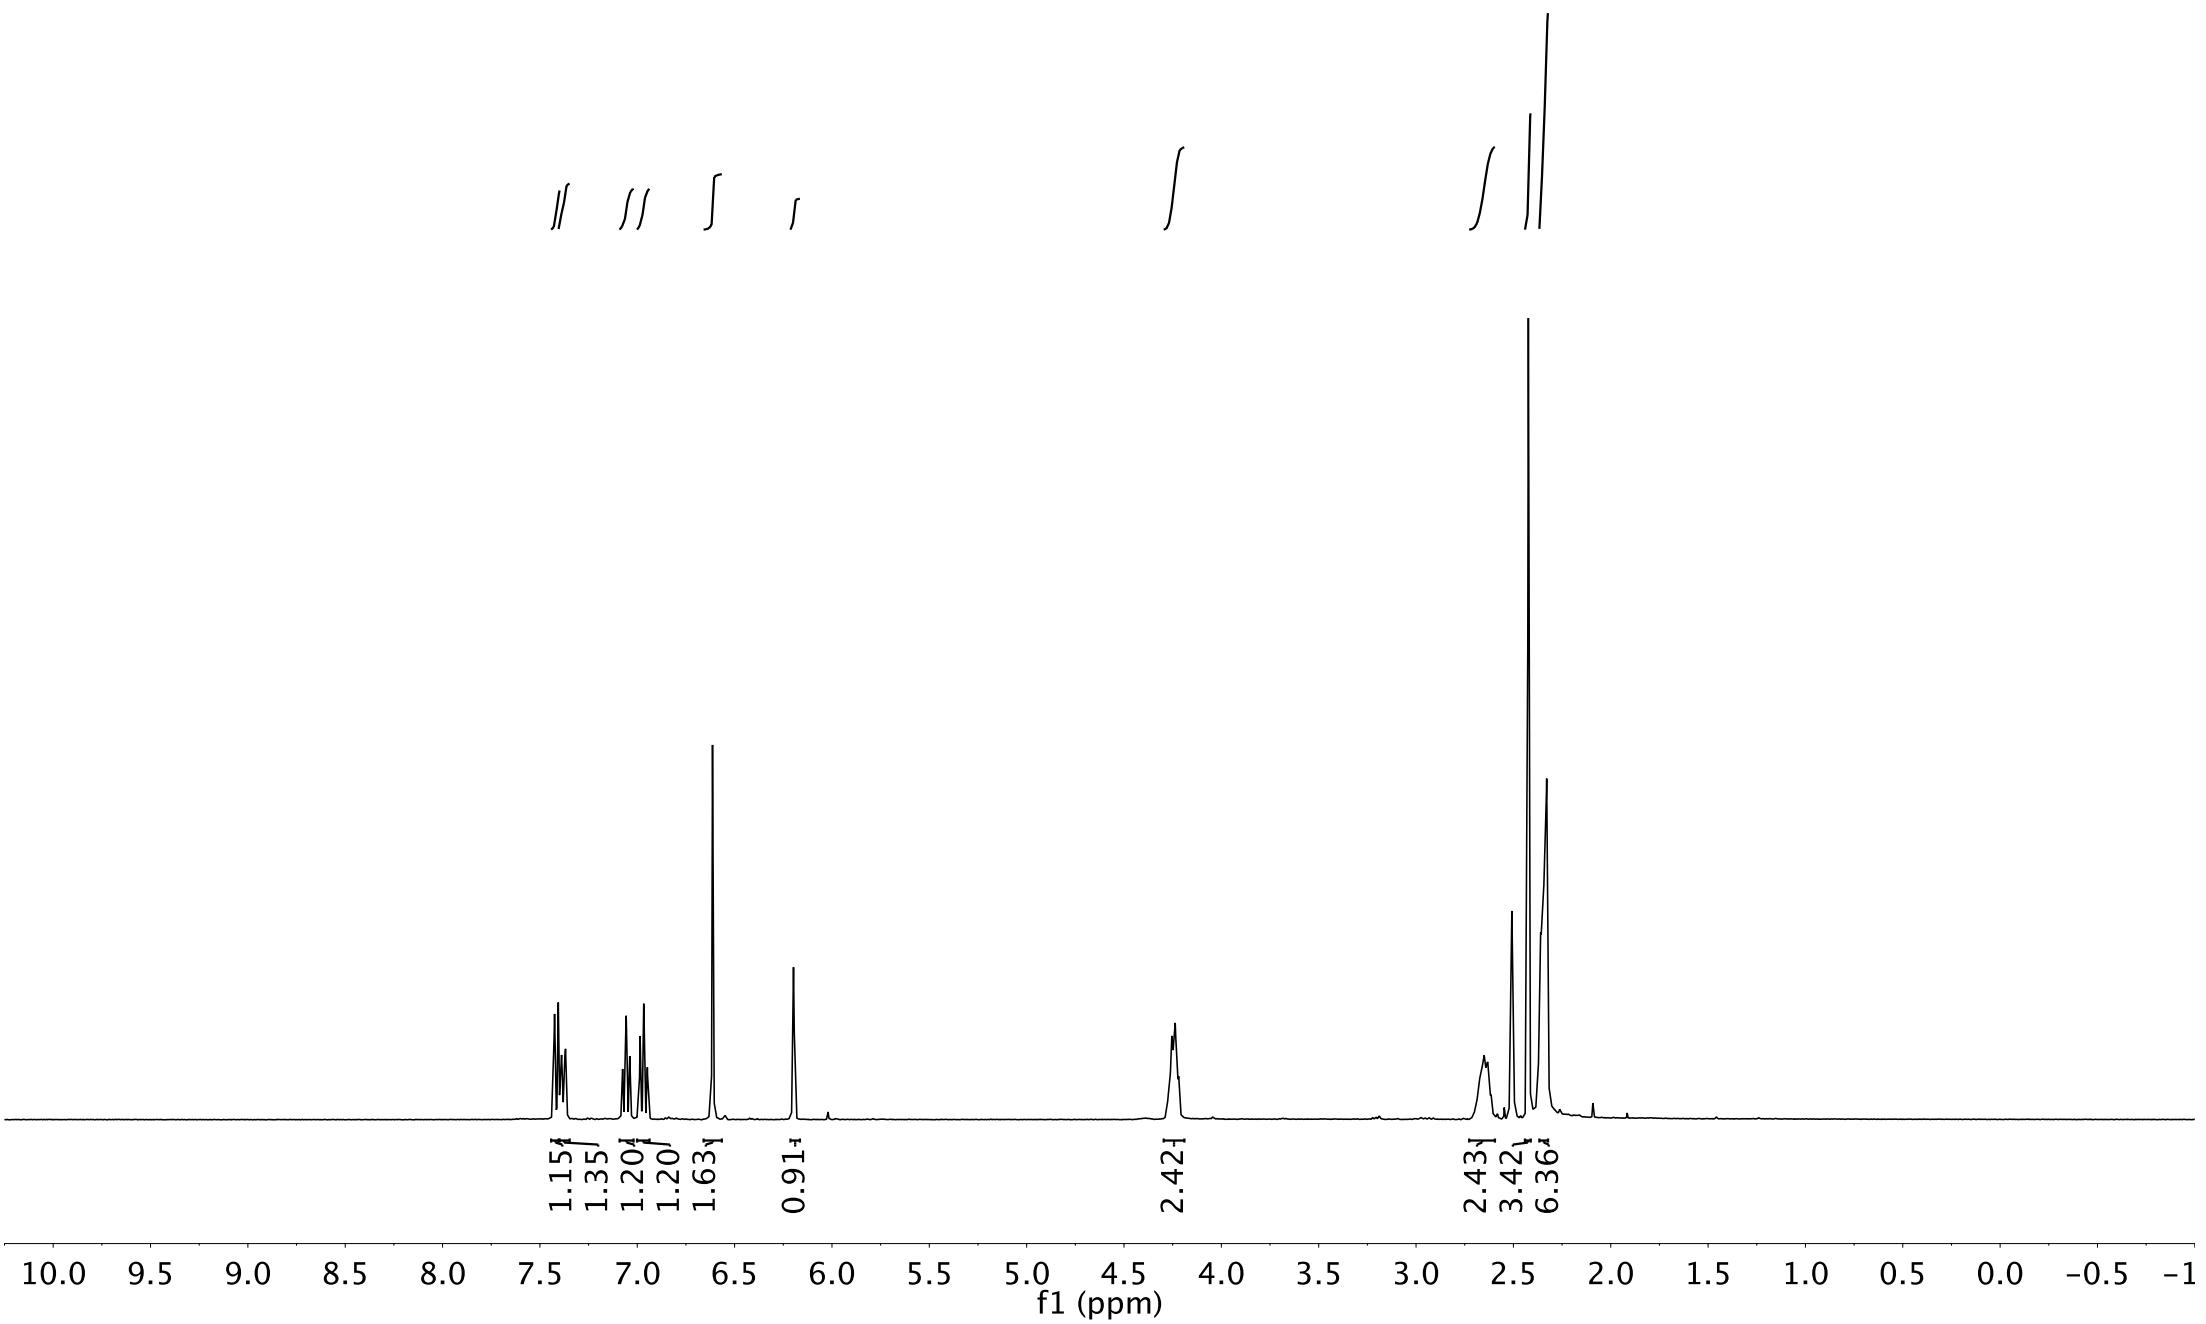

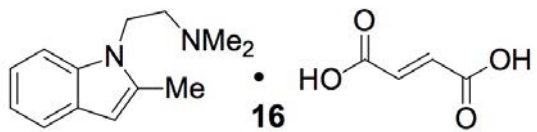

-167.03

137.08

136.72

134.75

-128.09

120.58

119.65

119.62

119.40

-109.61

-100.14

-57.85

-45.21

S34  
-12.76

190 180 170 160 150 140 130 120 110 100 90 80 70 60 50 40 30 20 10 0  
f1 (ppm)

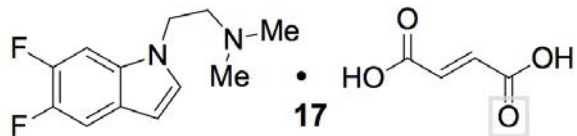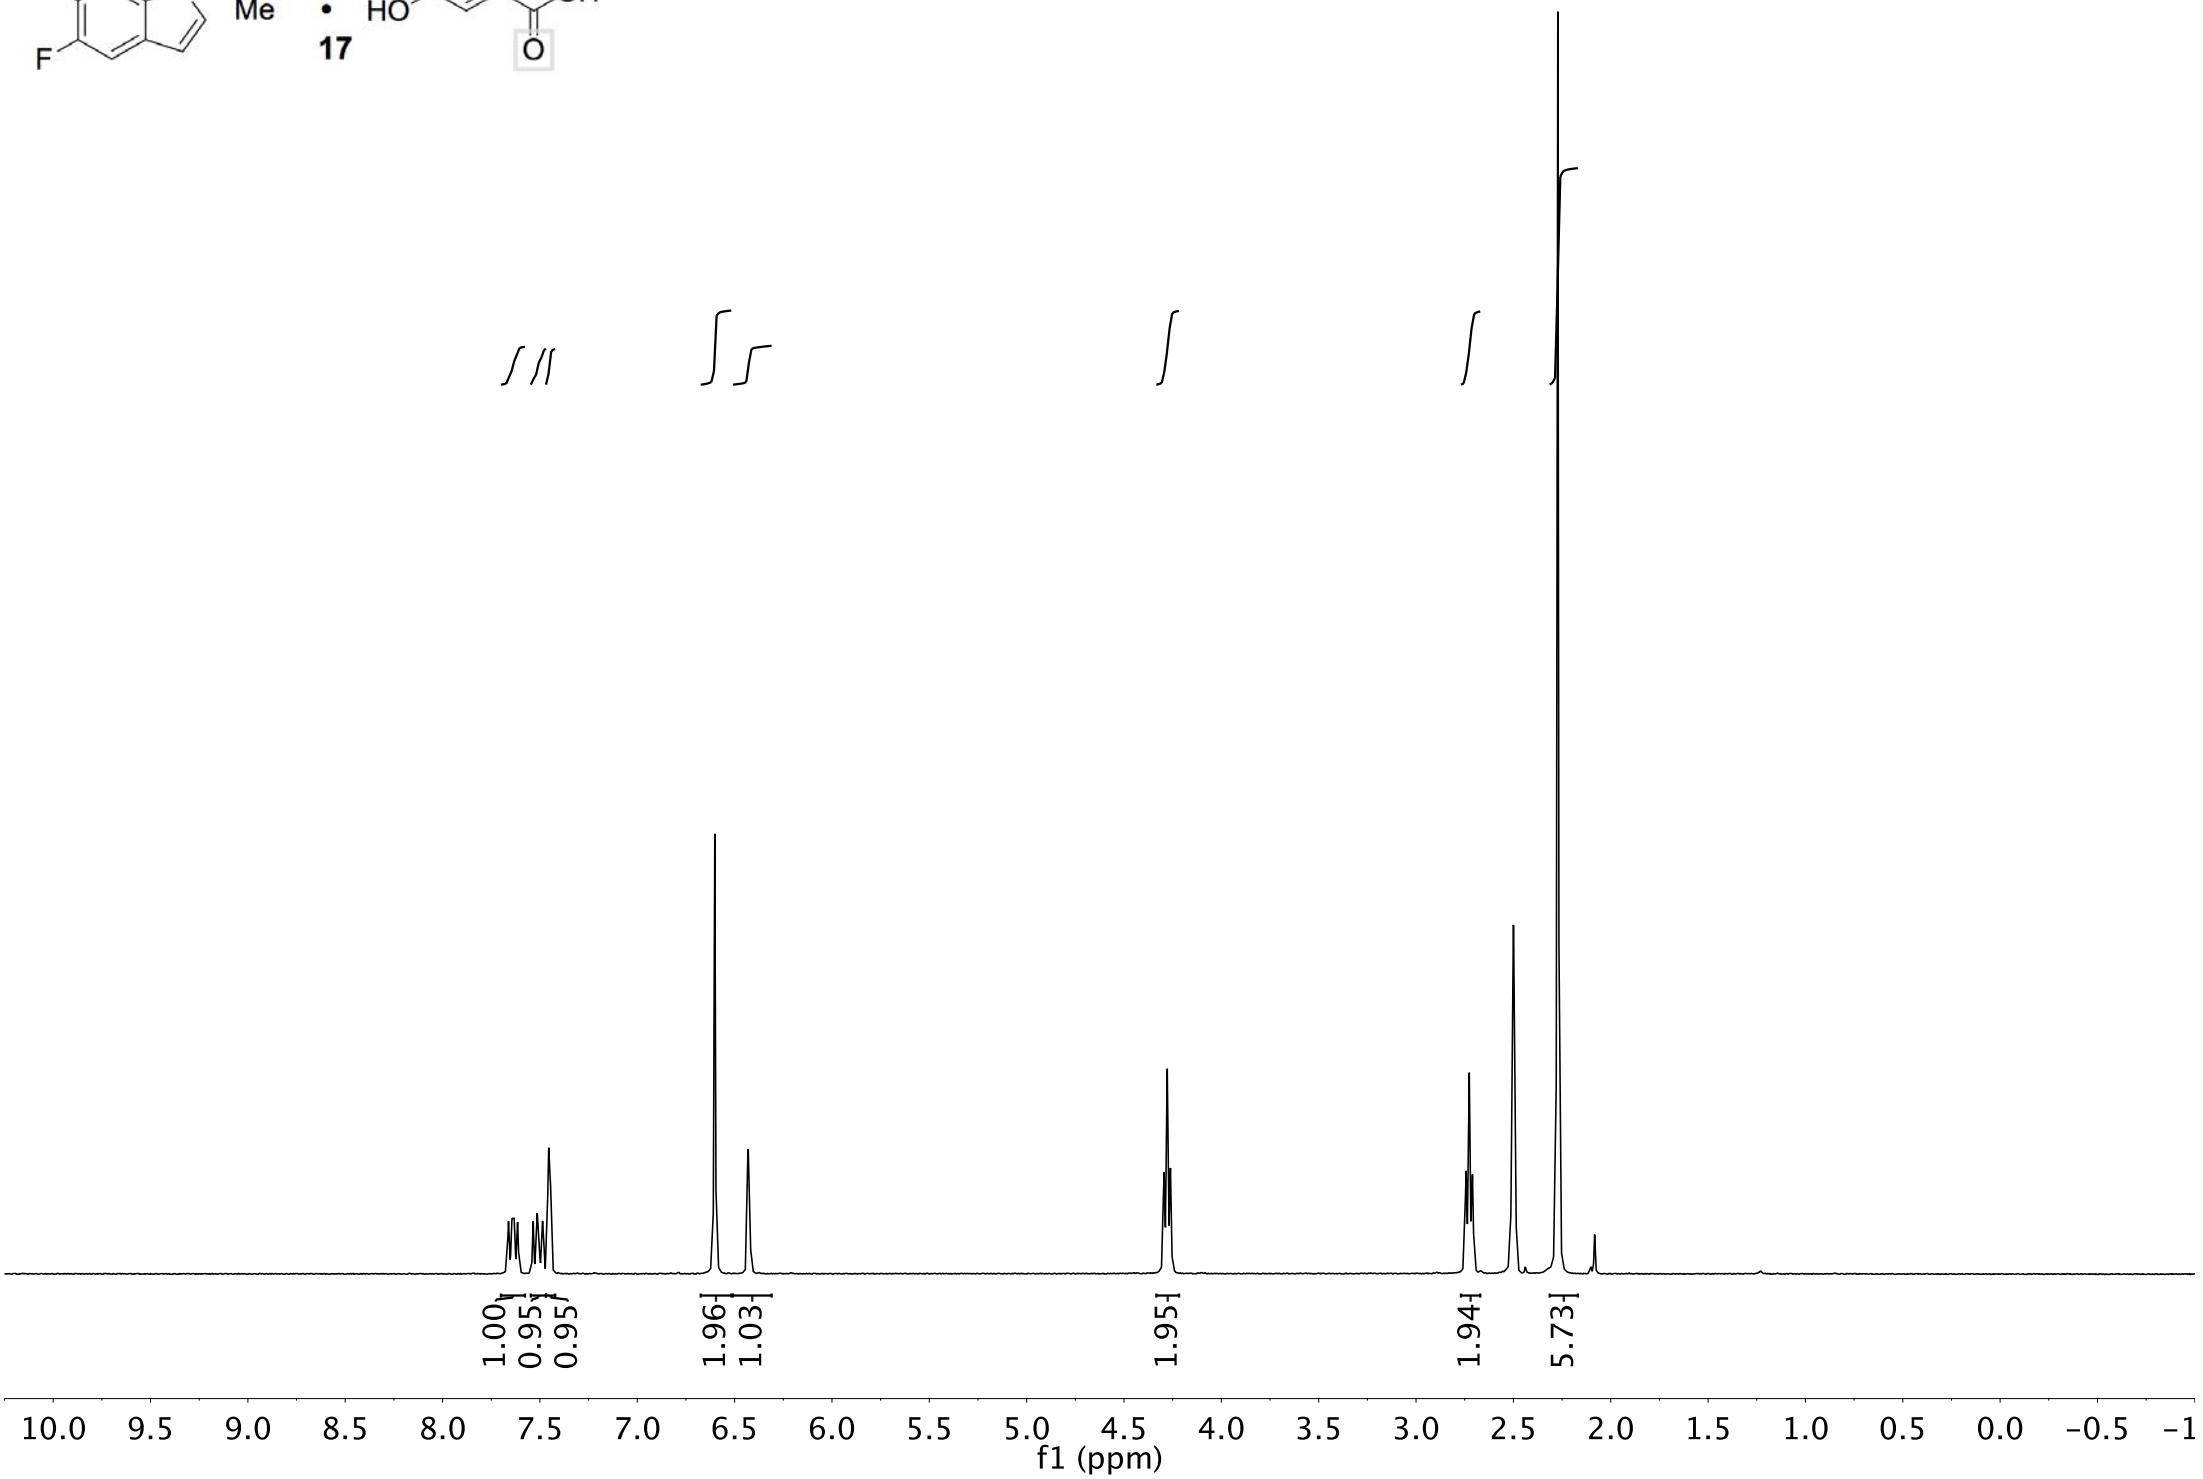

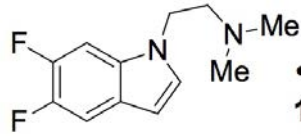

• **17**

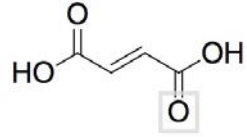

-166.37

134.21  
131.09  
130.99  
130.70  
130.67  
123.21  
123.12

106.86  
106.67  
100.98  
100.94  
98.30  
98.08

-57.86

44.71  
43.36

S36





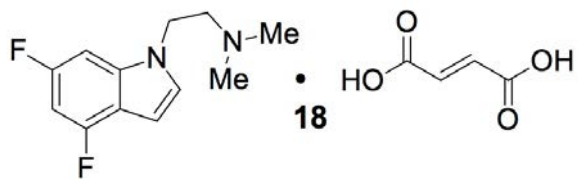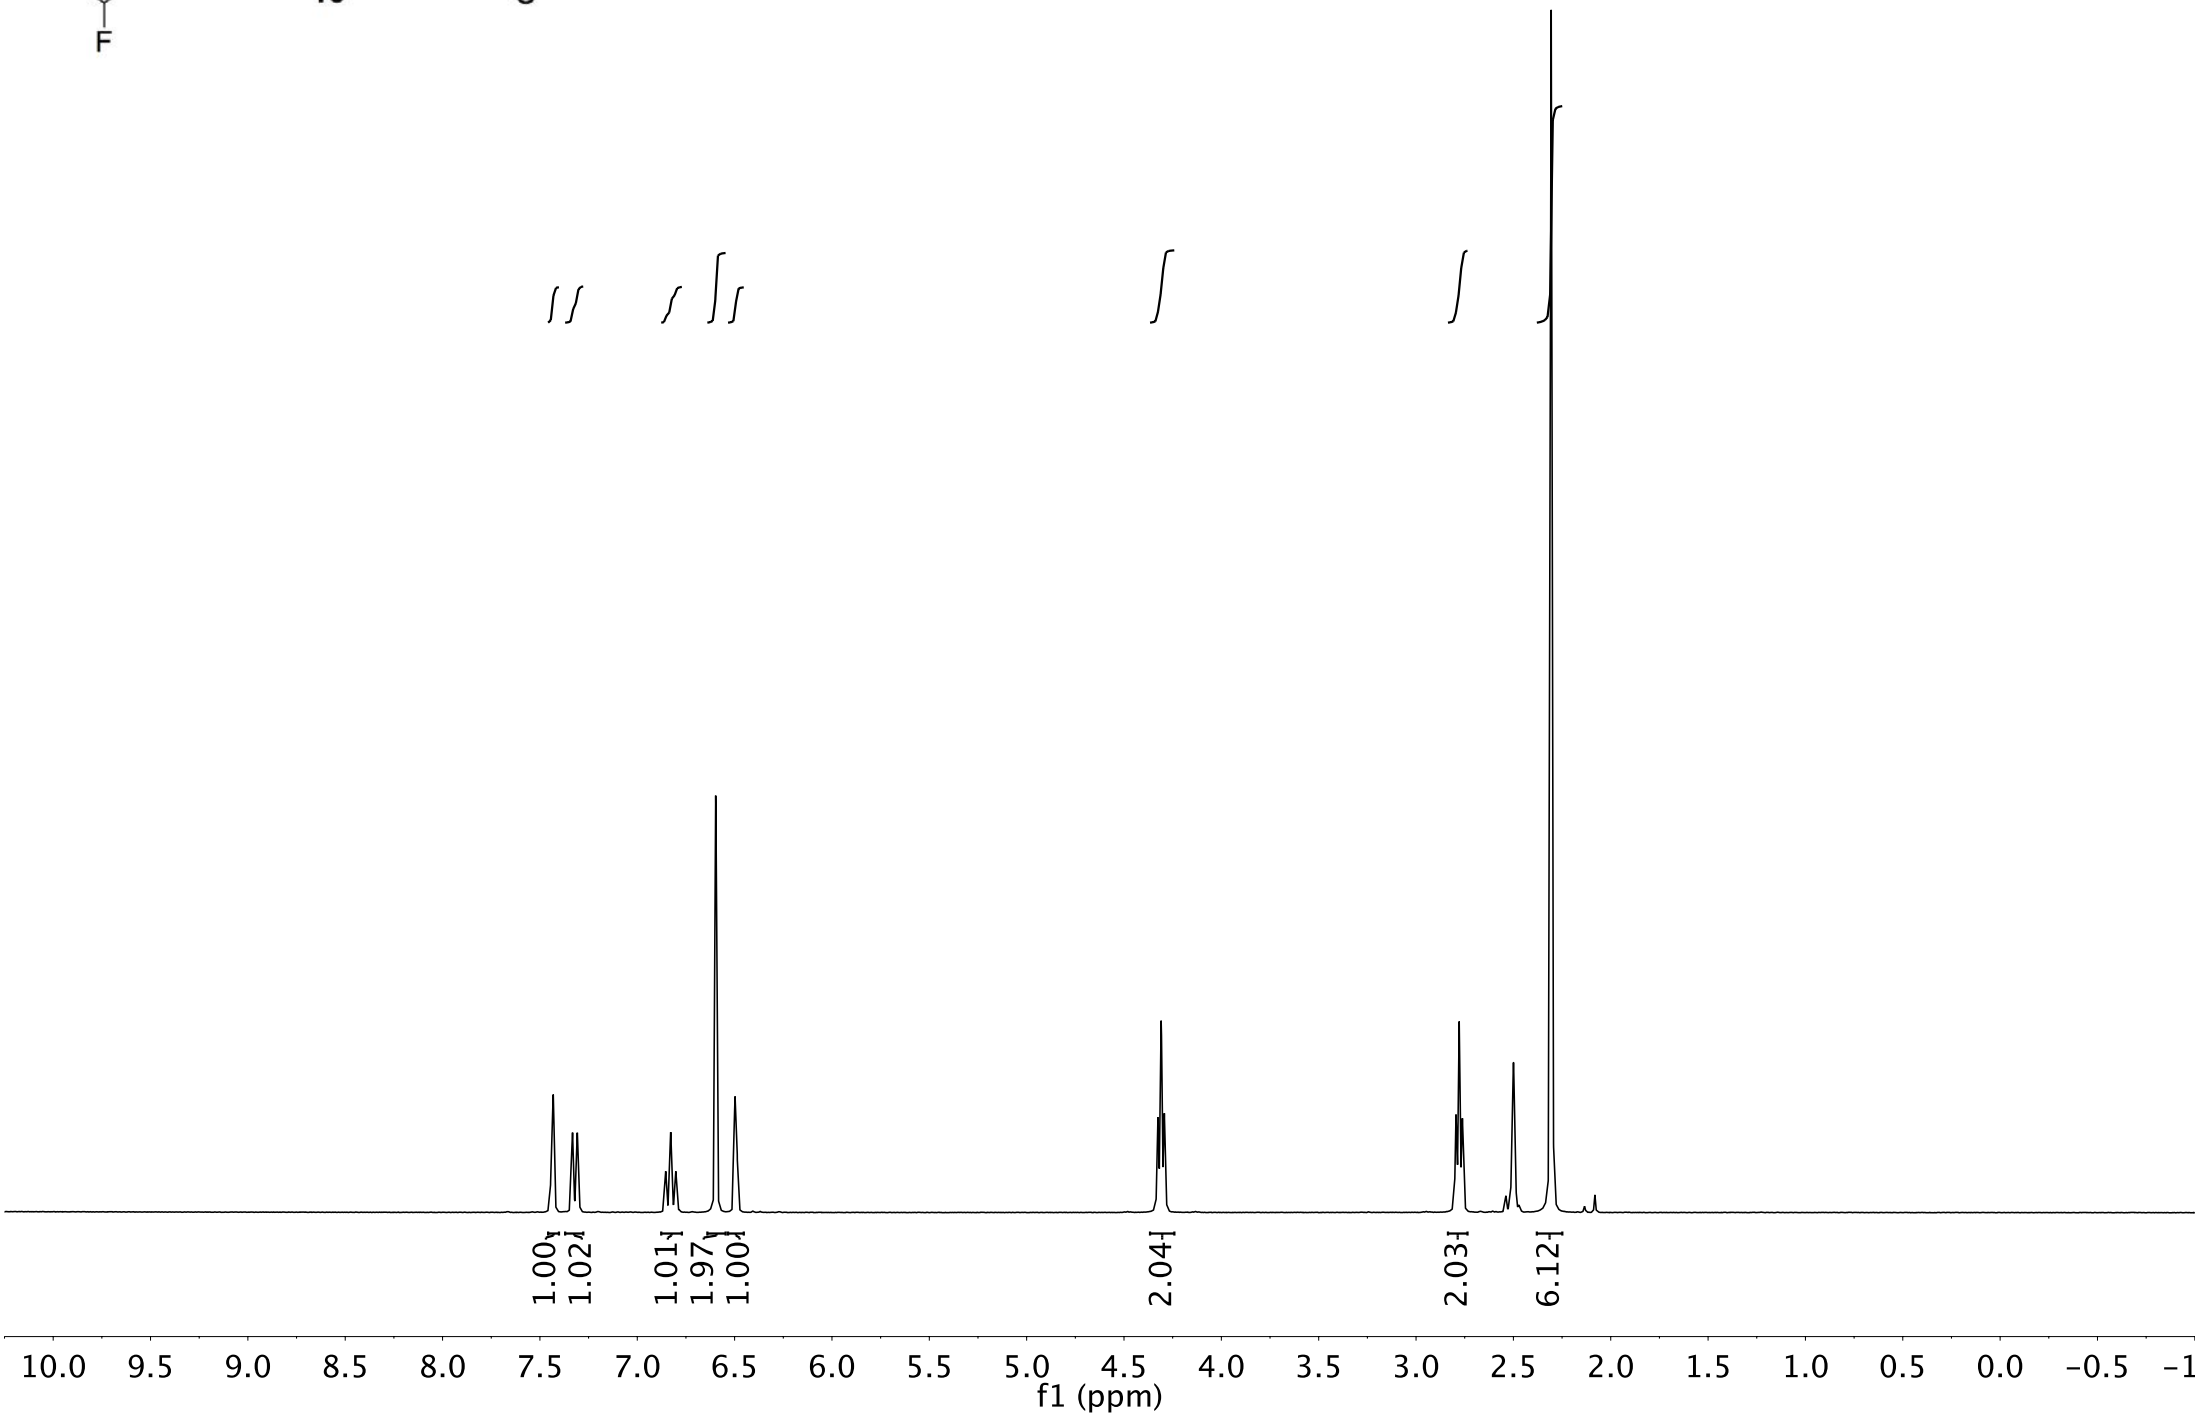

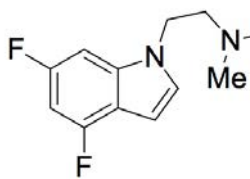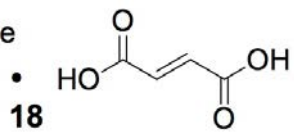

166.55  
159.33  
159.21  
156.99  
156.87  
156.03  
155.88  
153.58  
153.43  
137.50  
137.36  
137.22  
134.29  
129.82  
129.79

113.42  
113.20

96.61  
94.53  
94.30  
94.24  
94.00  
93.32  
93.28  
93.06  
93.02

-57.49

44.49  
43.23

S38

190 180 170 160 150 140 130 120 110 100 90 80 70 60 50 40 30 20 10 0

f1 (ppm)

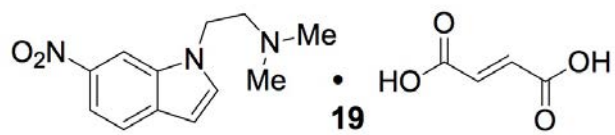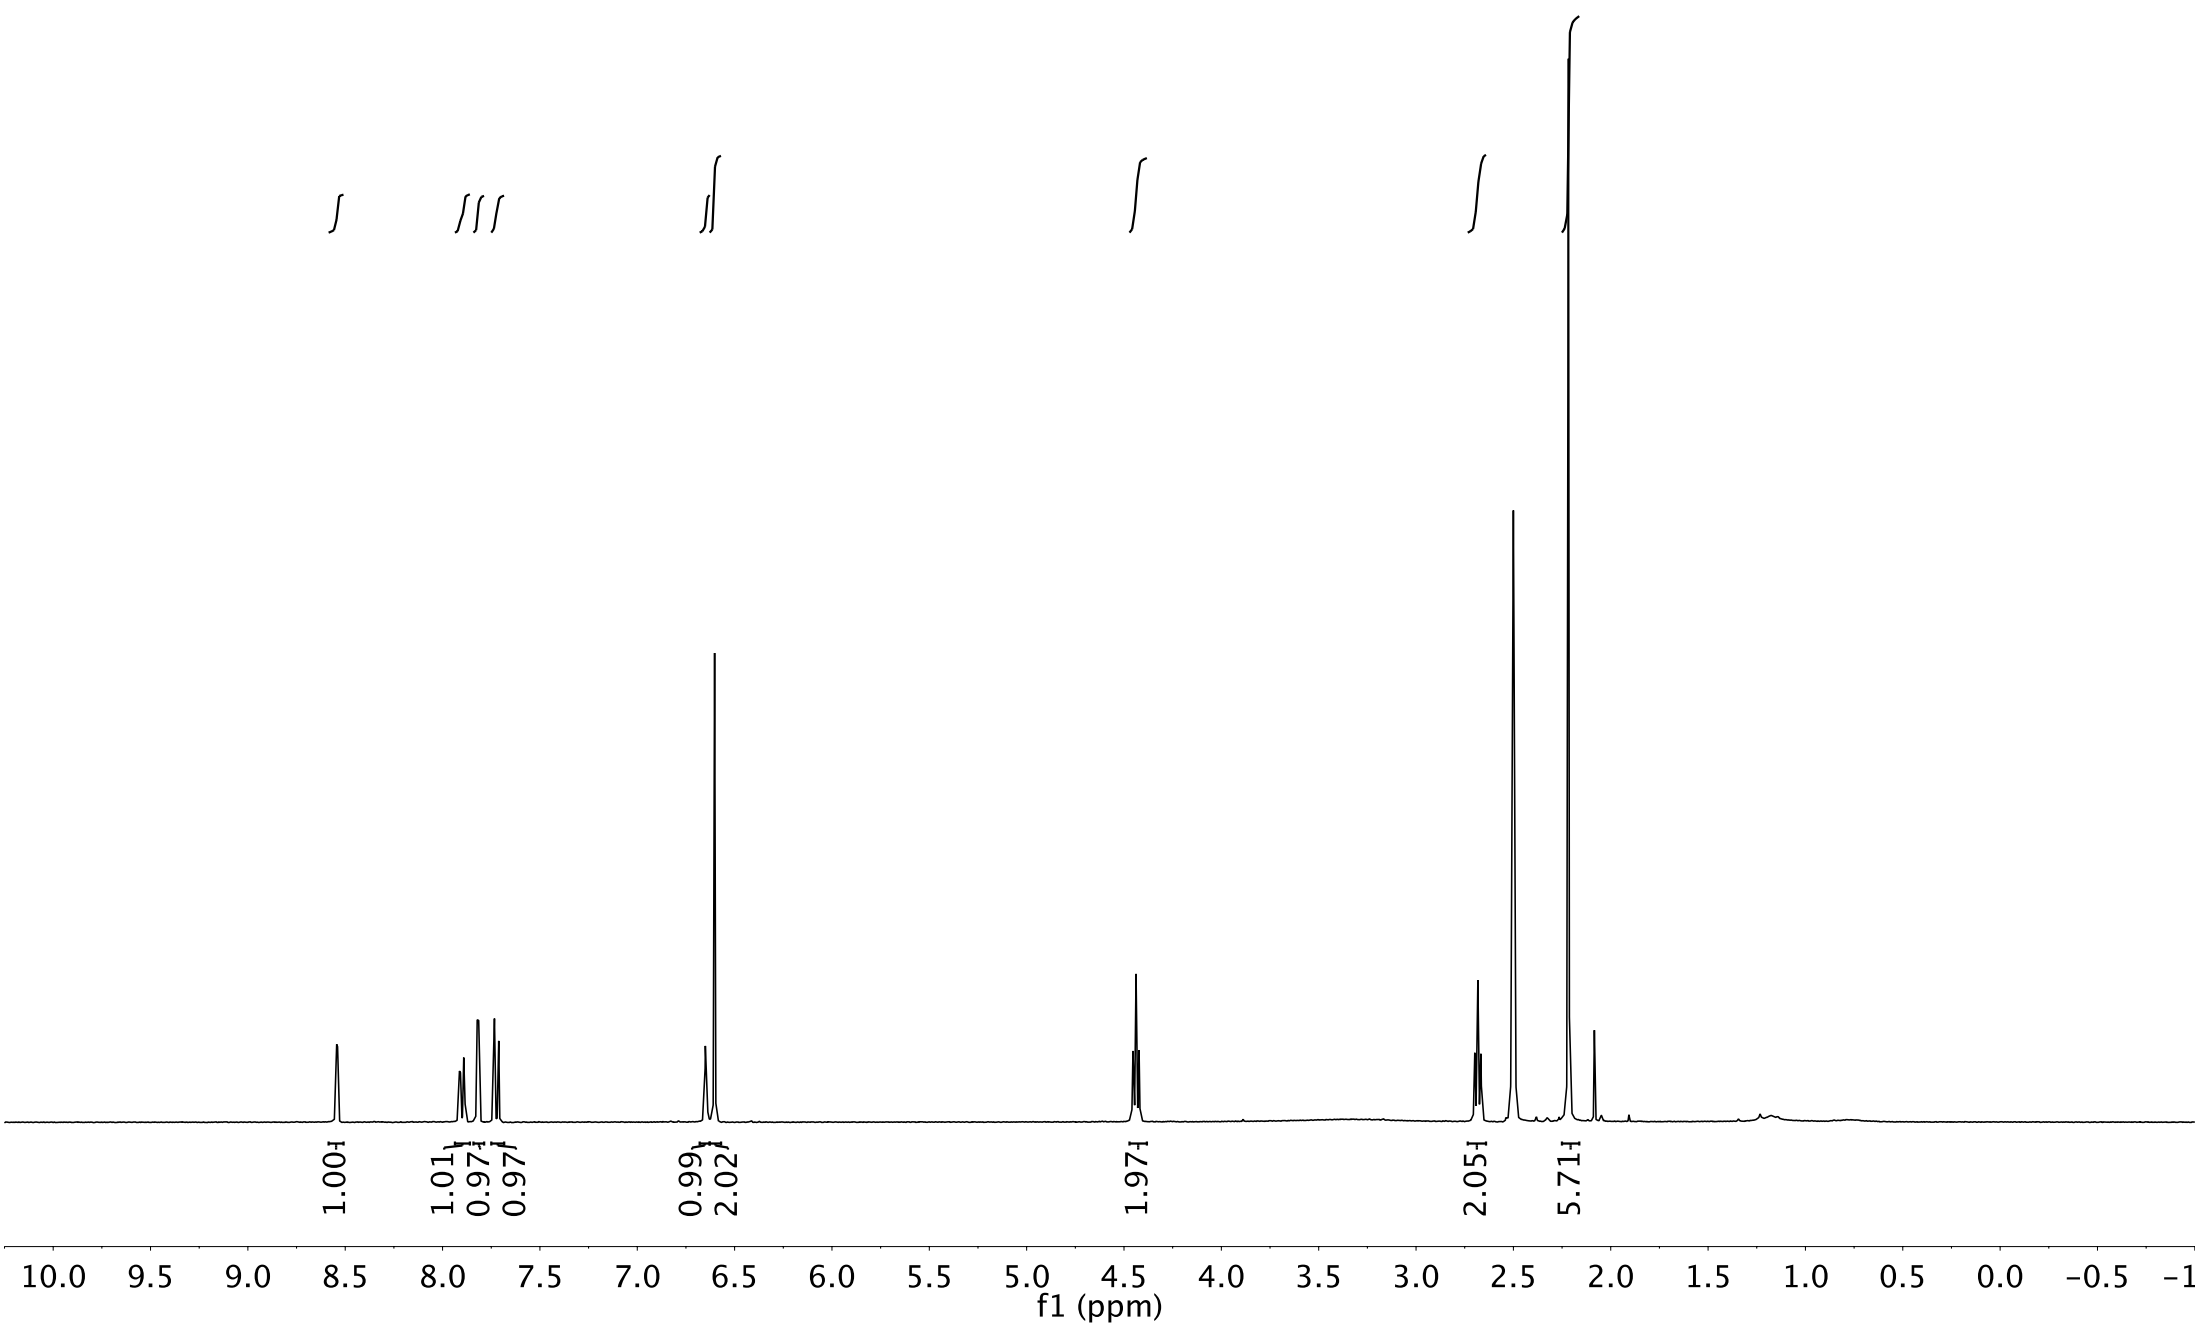

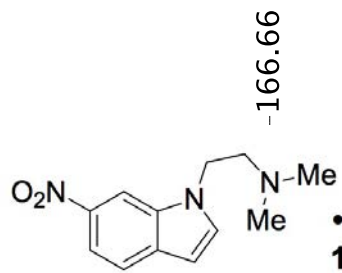

•  
**19**

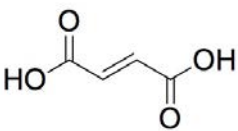

-166.66

136.18

134.76

134.59

133.41

-121.04

-114.52

-107.53

-102.25

-58.98

45.50

44.18

-18.59

40

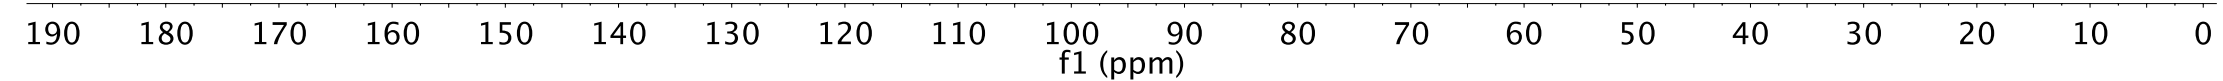

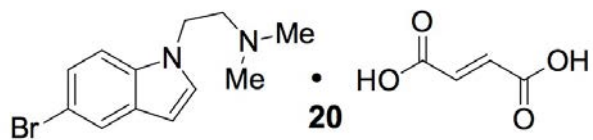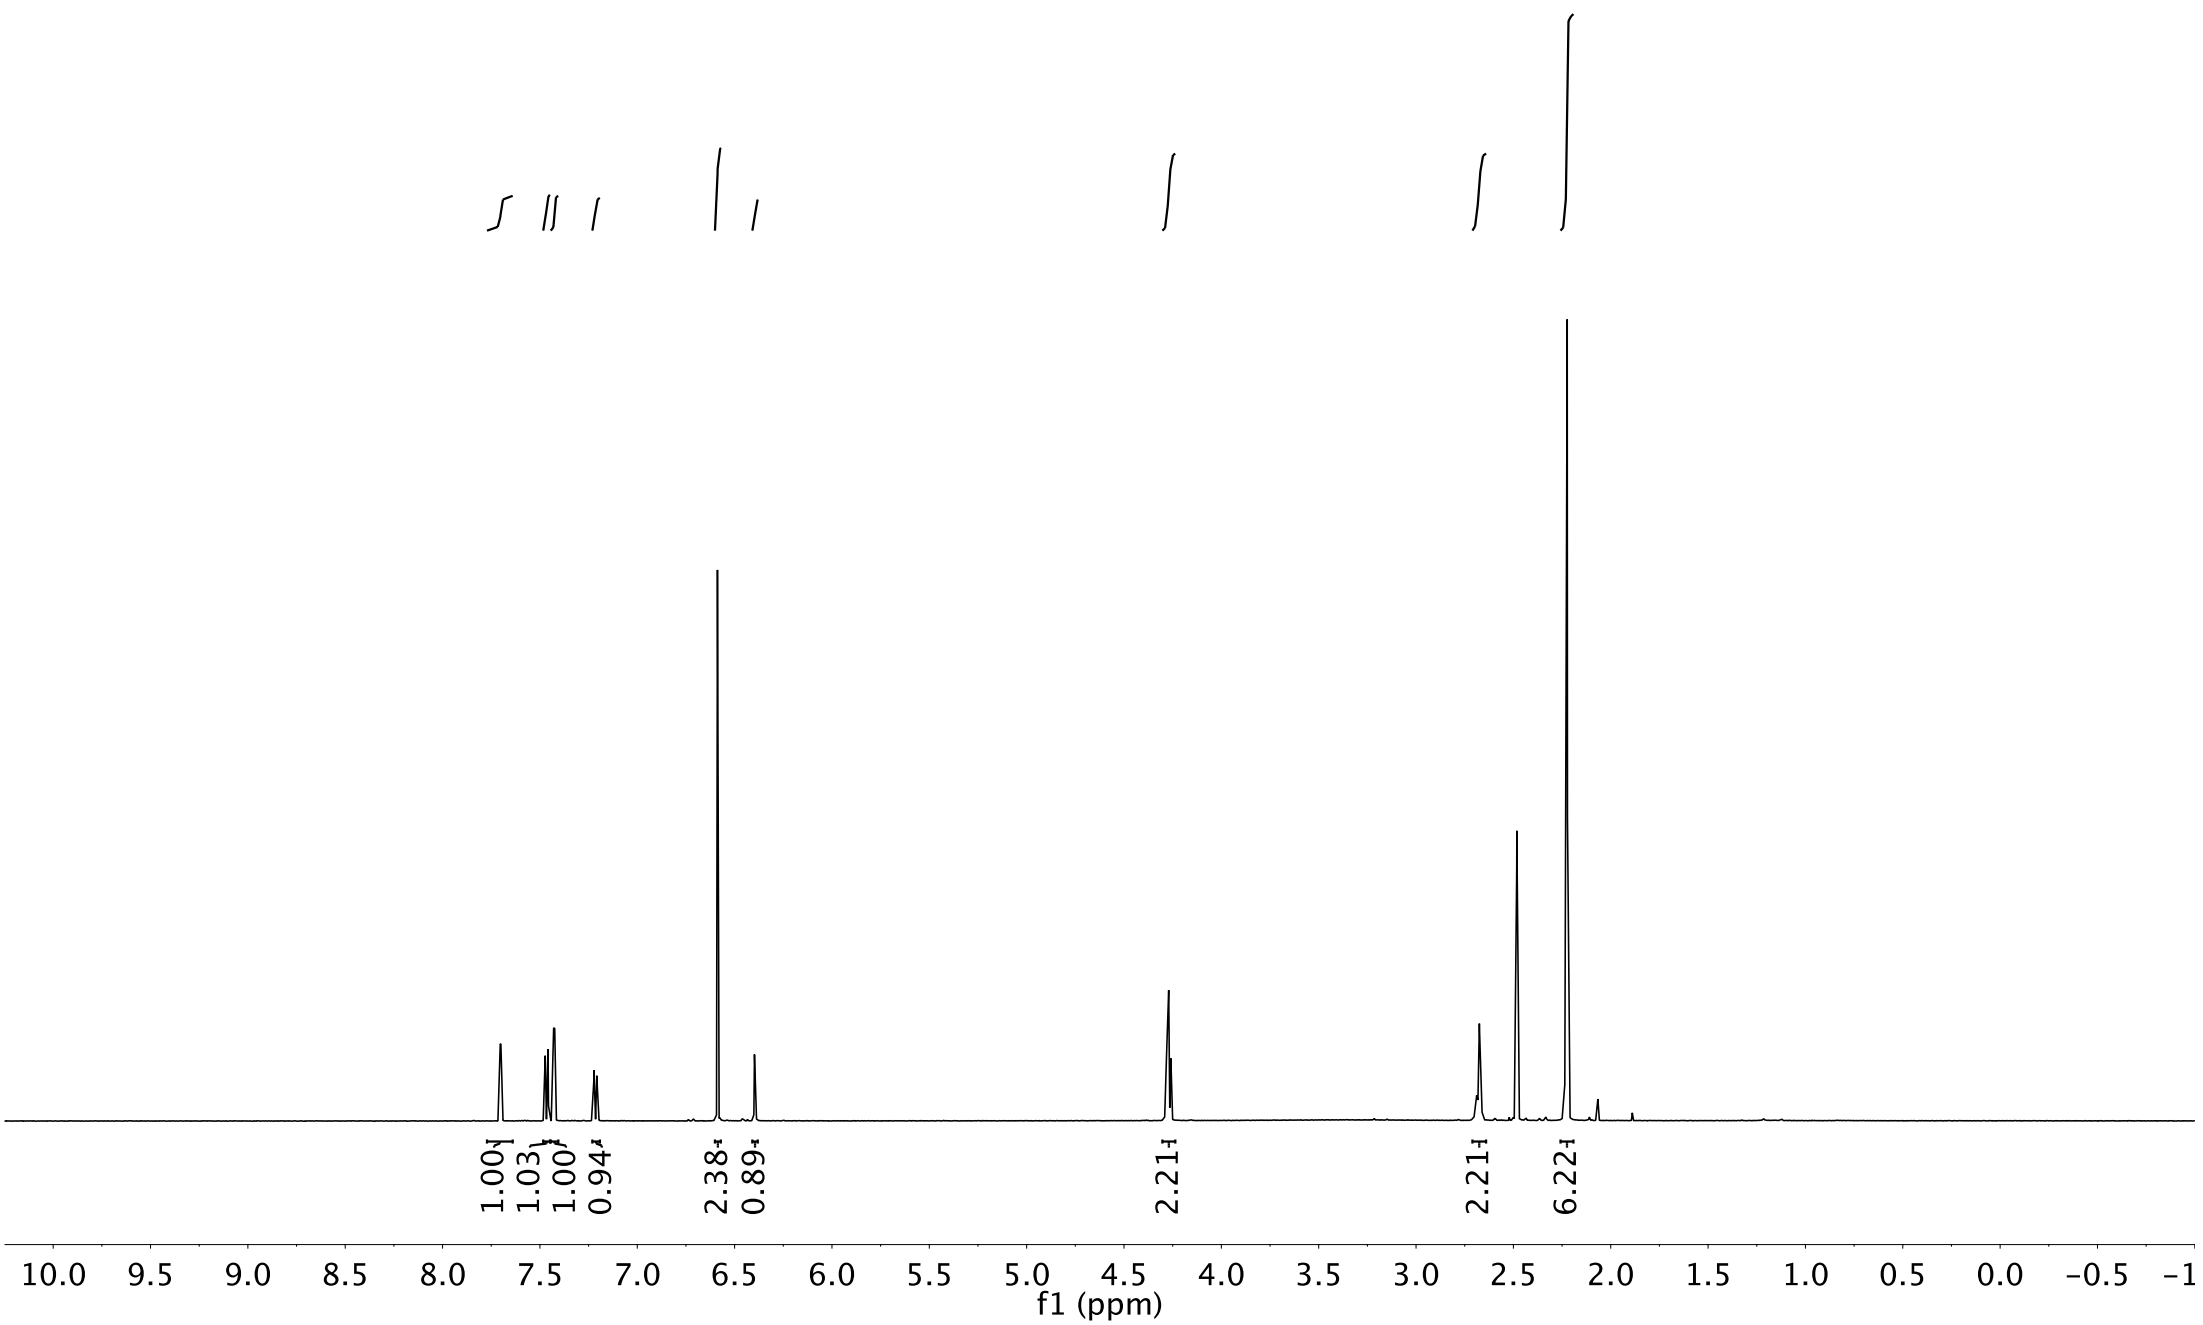

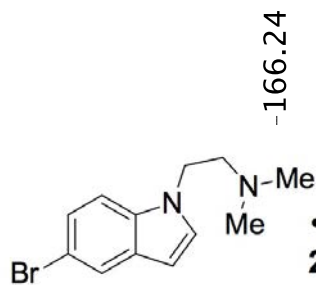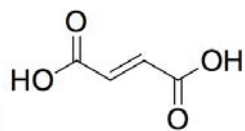

-166.24

134.47

134.15

130.46

129.89

123.38

122.54

111.87

111.56

-100.28

-58.09

44.86

43.32

S42

190 180 170 160 150 140 130 120 110 100 90 80 70 60 50 40 30 20 10 0

f1 (ppm)

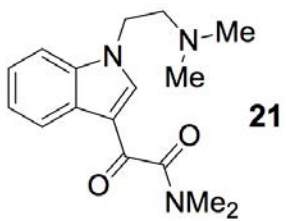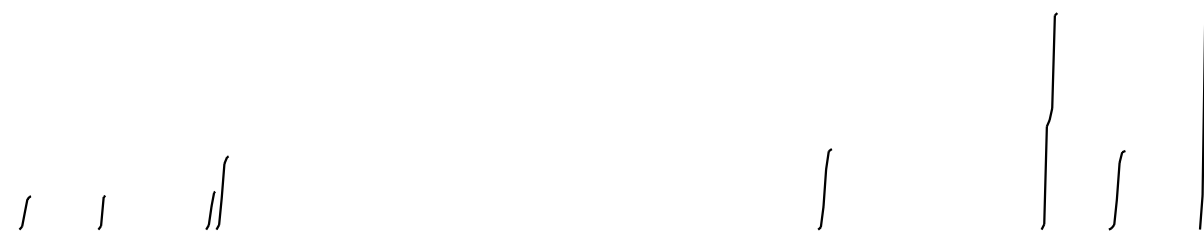

1.004

1.014

1.134

2.184

2.404

6.461

2.351

6.414

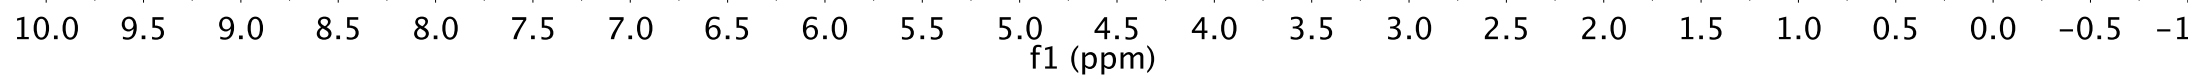

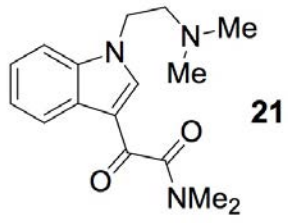

-185.64  
-167.70

138.82  
137.01  
126.36  
124.00  
123.28  
122.48  
-113.45  
-110.06

-58.40  
45.68  
45.43  
-37.59  
-34.51

S44

190 180 170 160 150 140 130 120 110 100 90 80 70 60 50 40 30 20 10 0  
f1 (ppm)



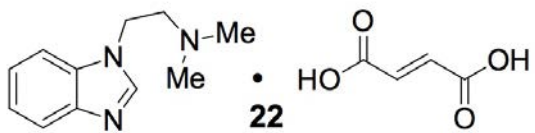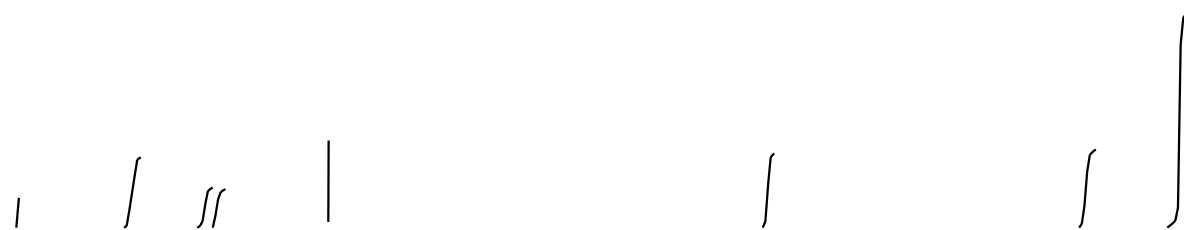

0.76

1.79H

1.02

0.98

2.21

1.88H

1.99H

5.50H

10.0 9.5 9.0 8.5 8.0 7.5 7.0 6.5 6.0 5.5 5.0 4.5 4.0 3.5 3.0 2.5 2.0 1.5 1.0 0.5 0.0 -0.5 -1

f1 (ppm)

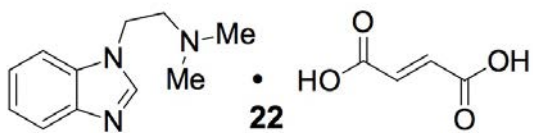

170.14

144.78

143.90

135.81

134.62

124.80

124.04

120.36

-111.29

-57.46

44.39

41.80

S46

210 200 190 180 170 160 150 140 130 120 110 100 90 80 70 60 50 40 30 20 10 0 -10  
f1 (ppm)

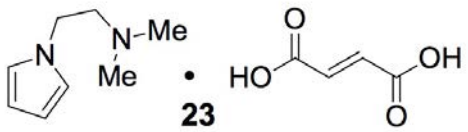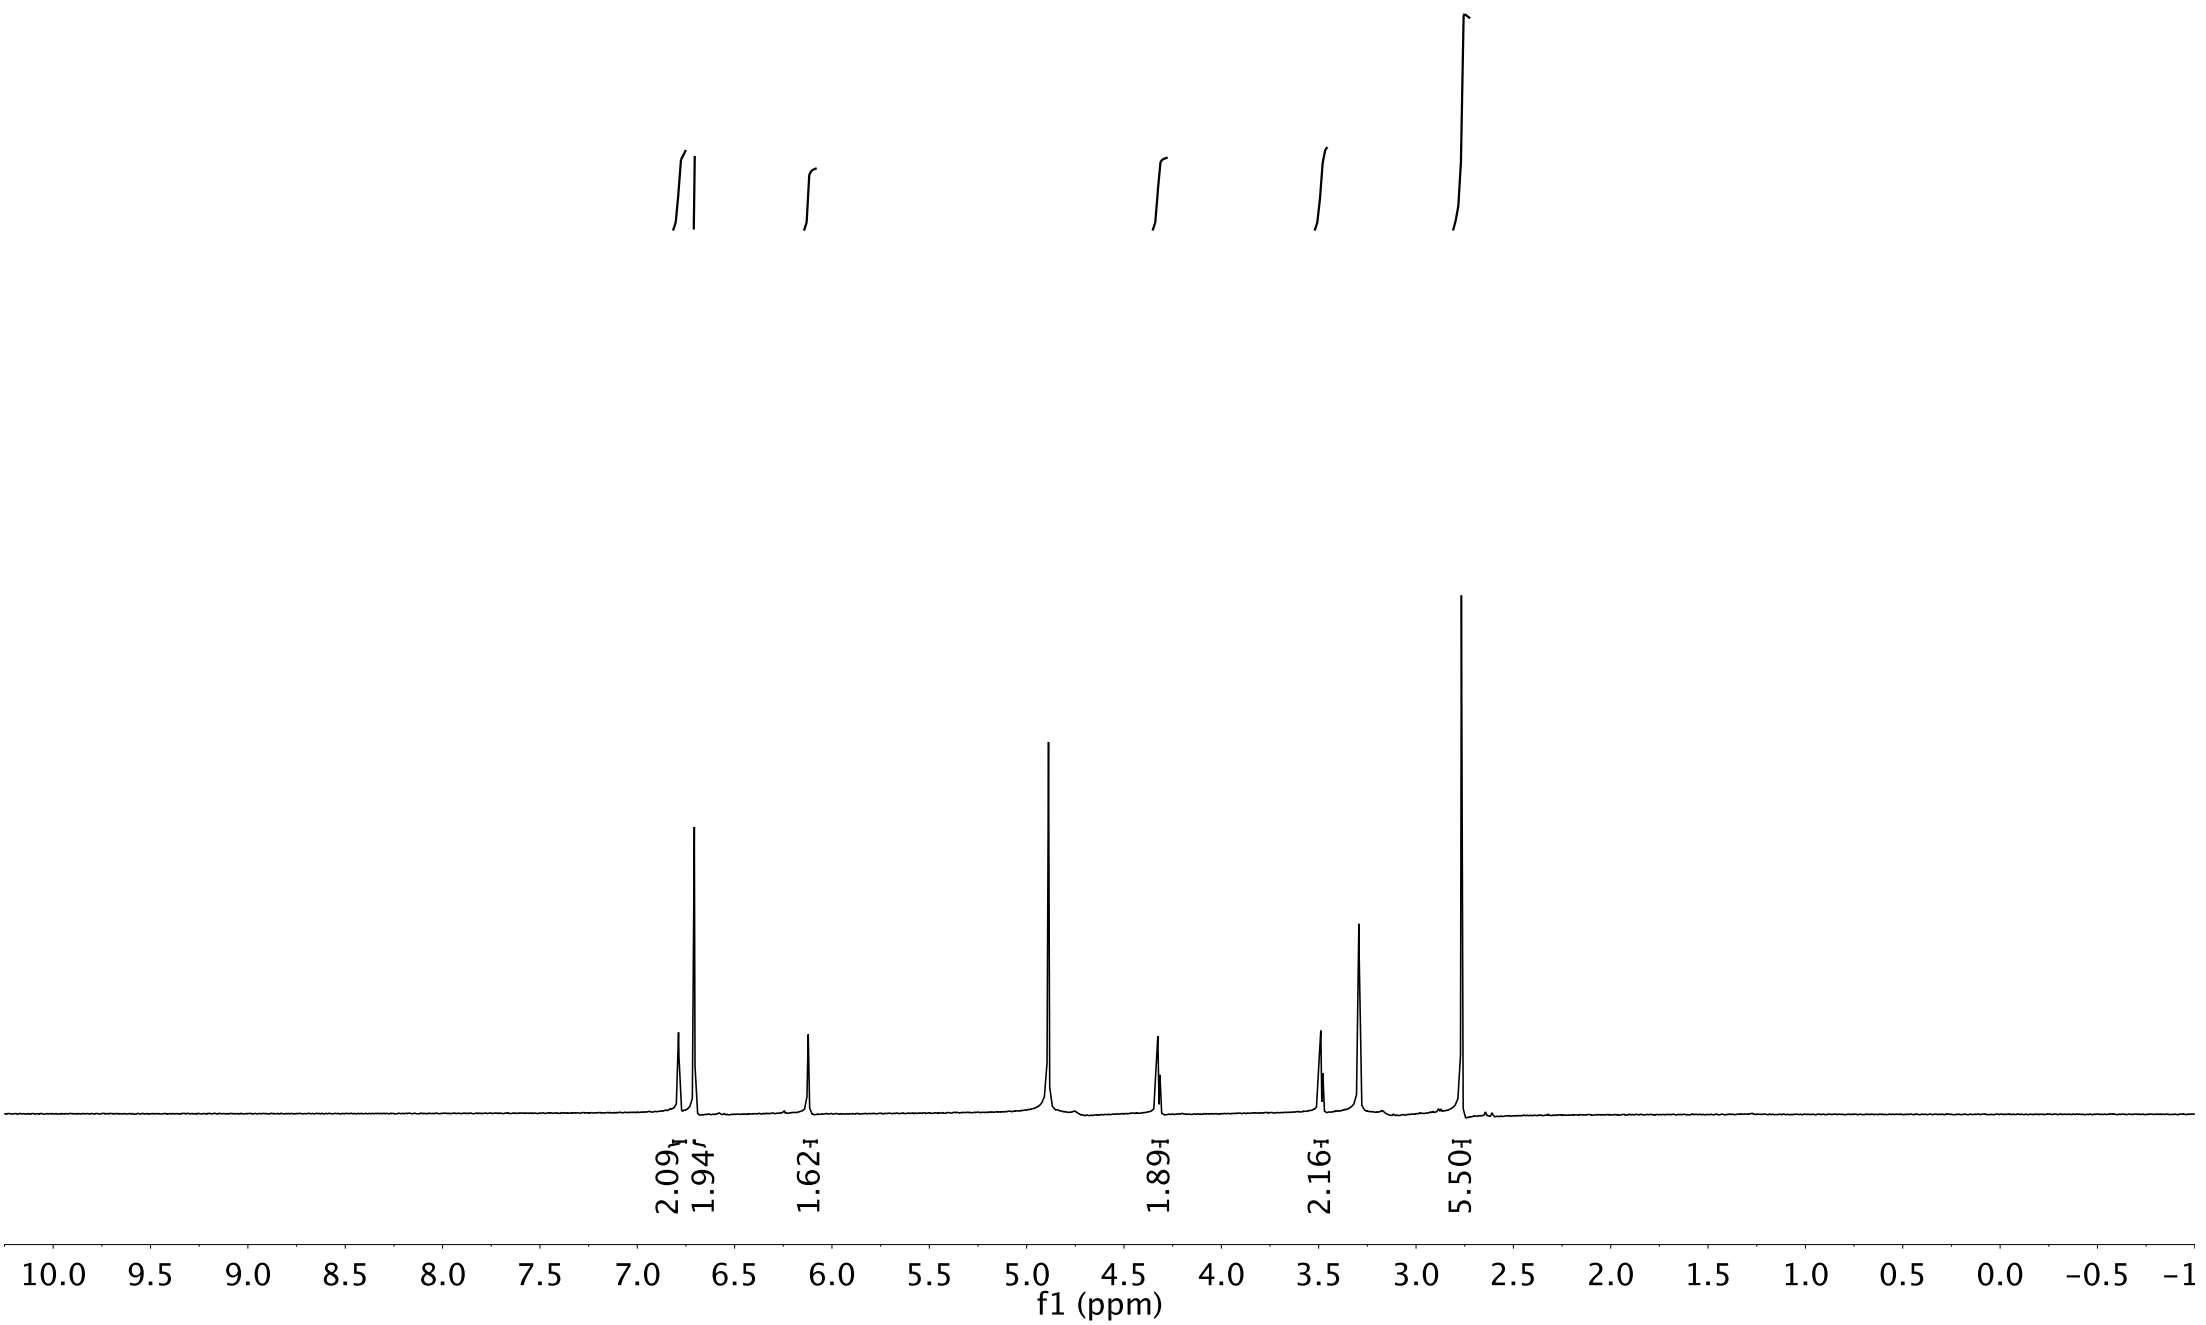

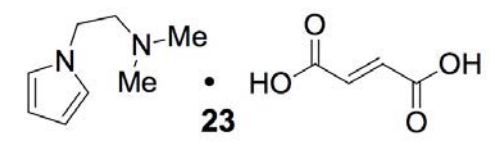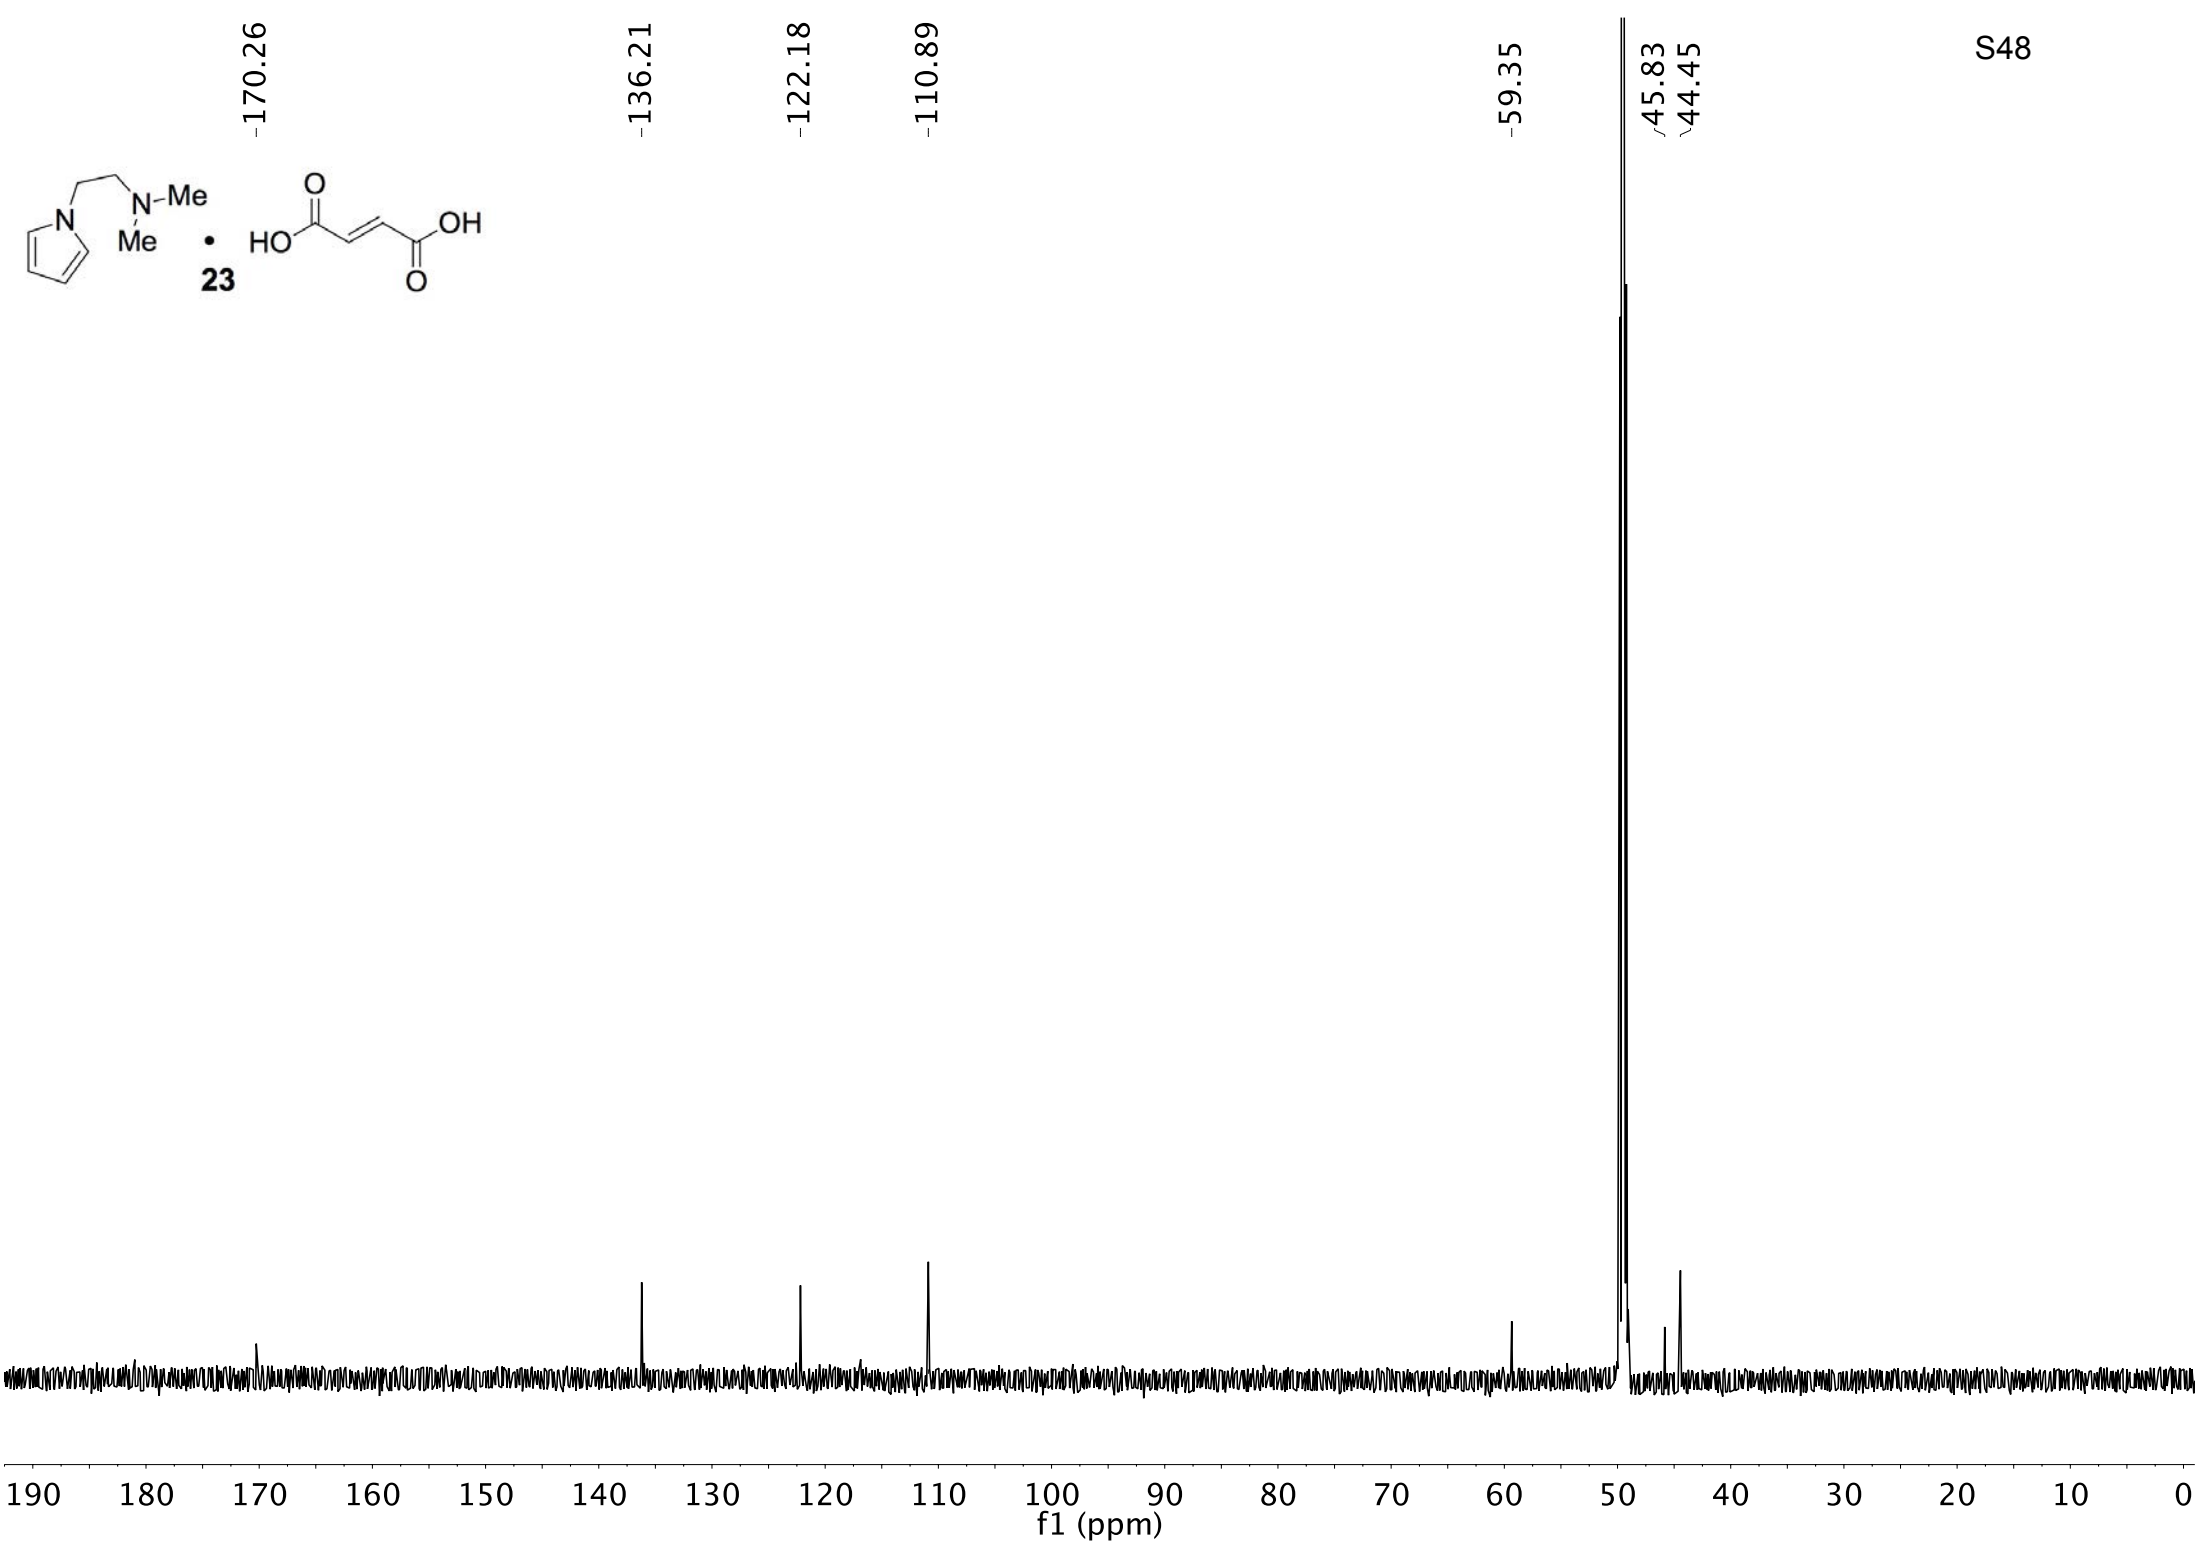

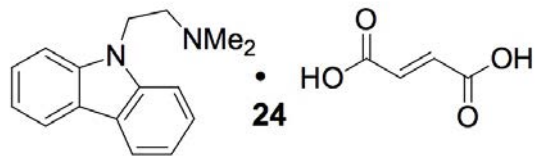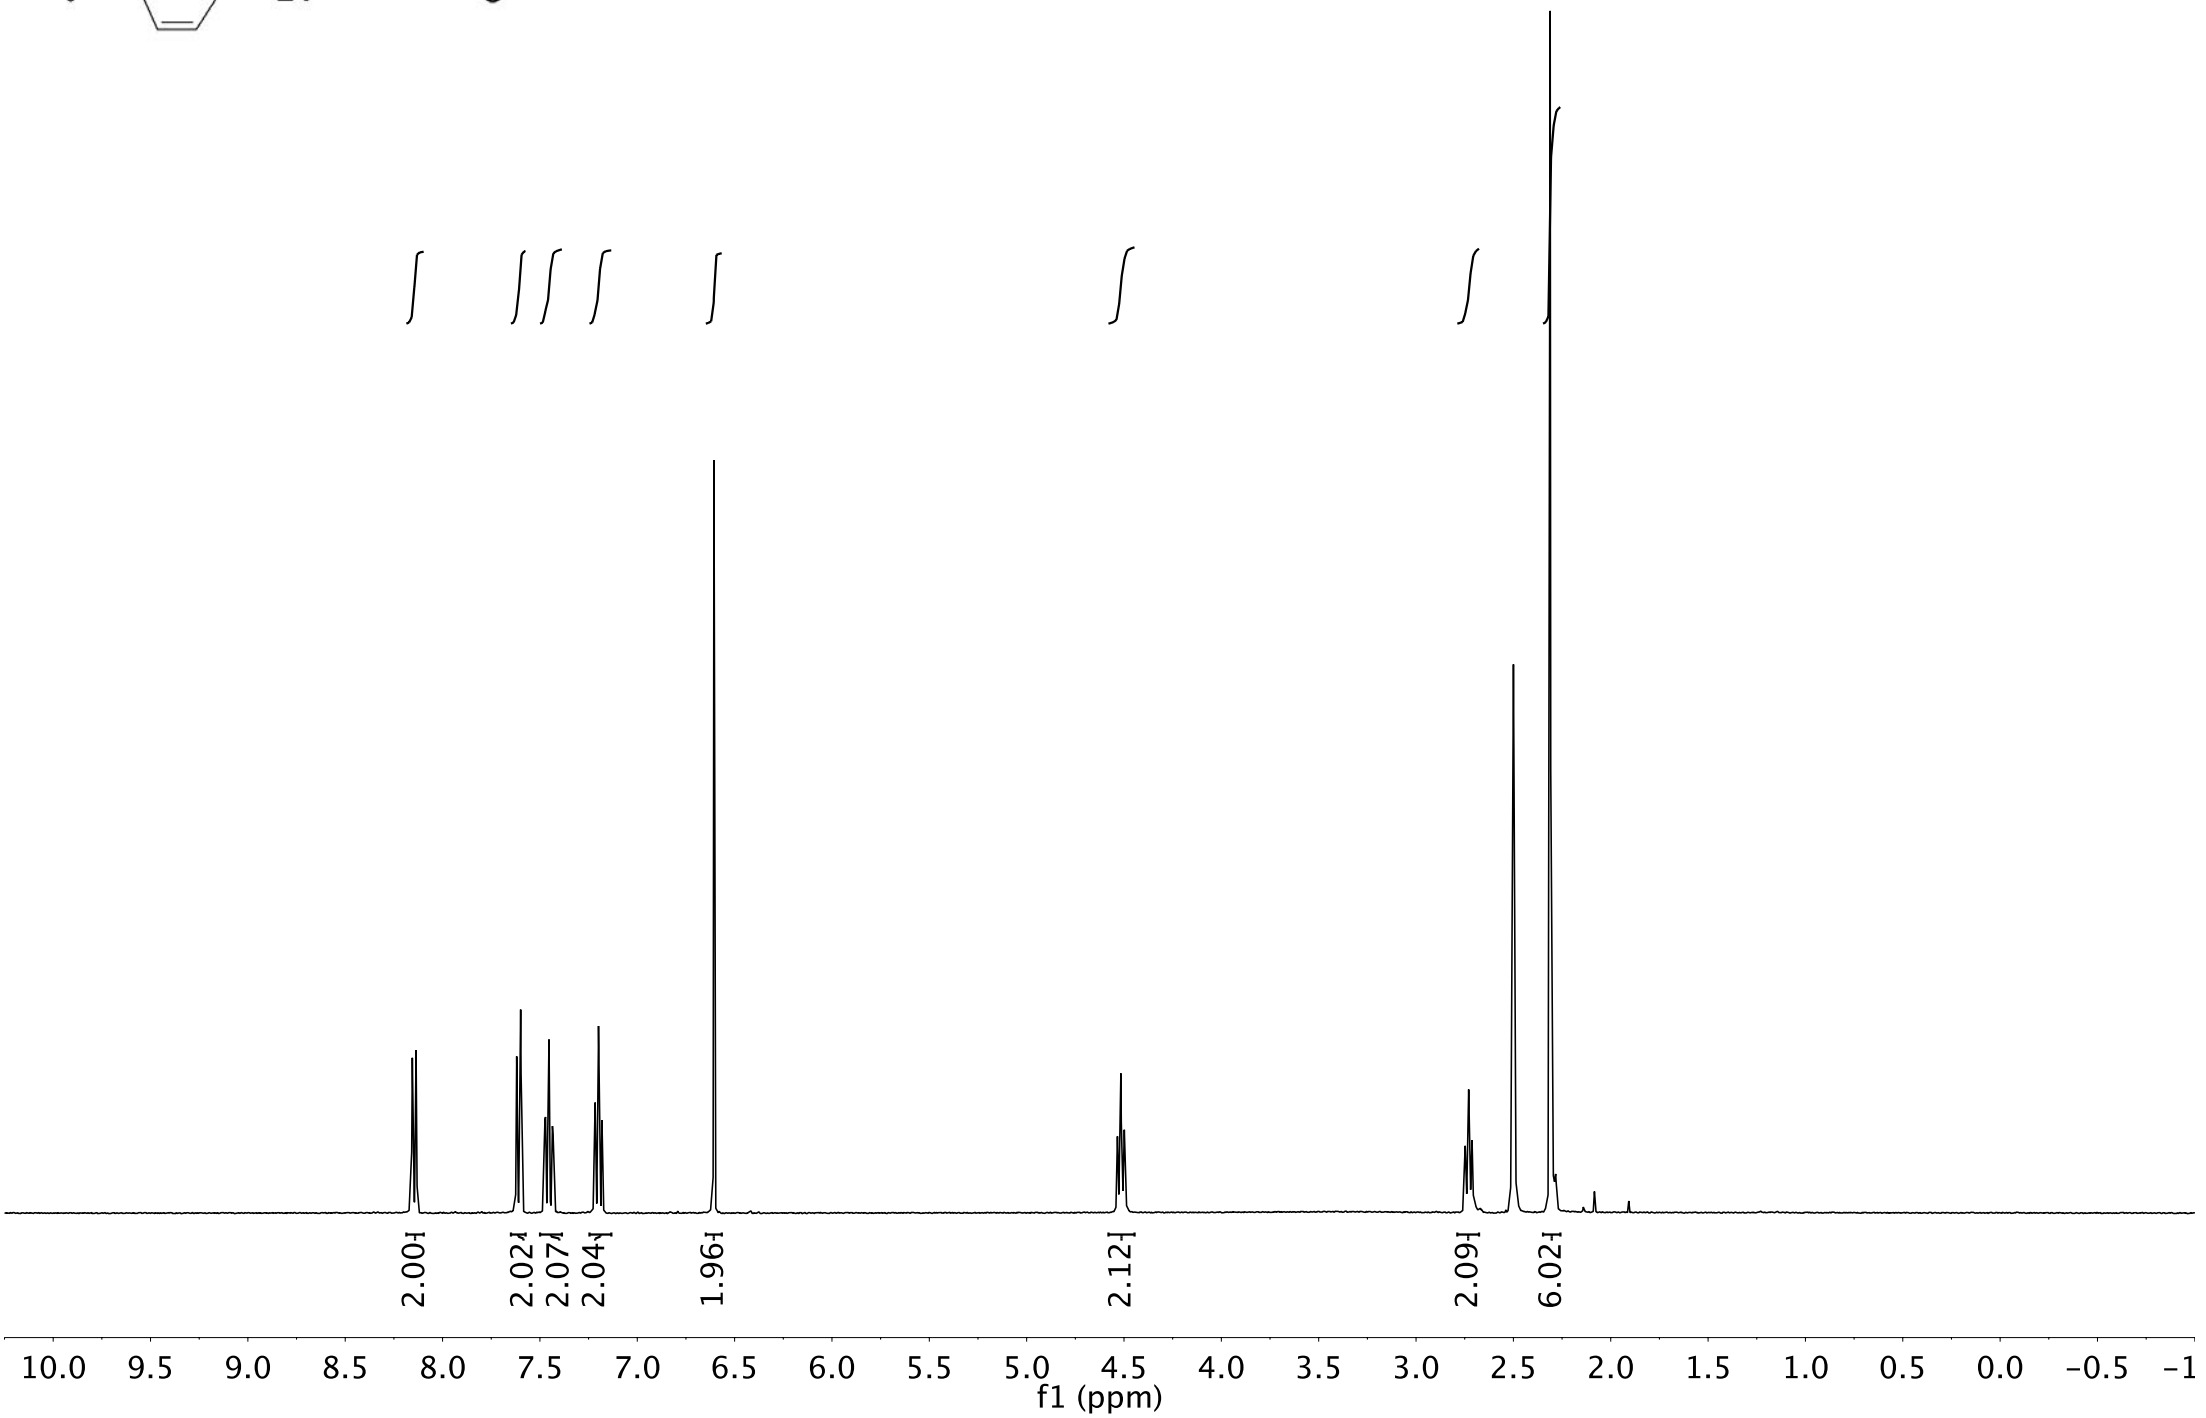

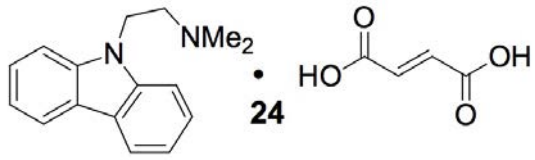

-169.78

-139.86

-134.76

-125.83

-123.17

-119.99

-119.39

-108.34

-54.39

-42.61

-37.85

S50

210 200 190 180 170 160 150 140 130 120 110 100 90 80 70 60 50 40 30 20 10 0 -10

f1 (ppm)

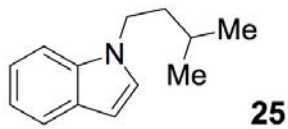

S51

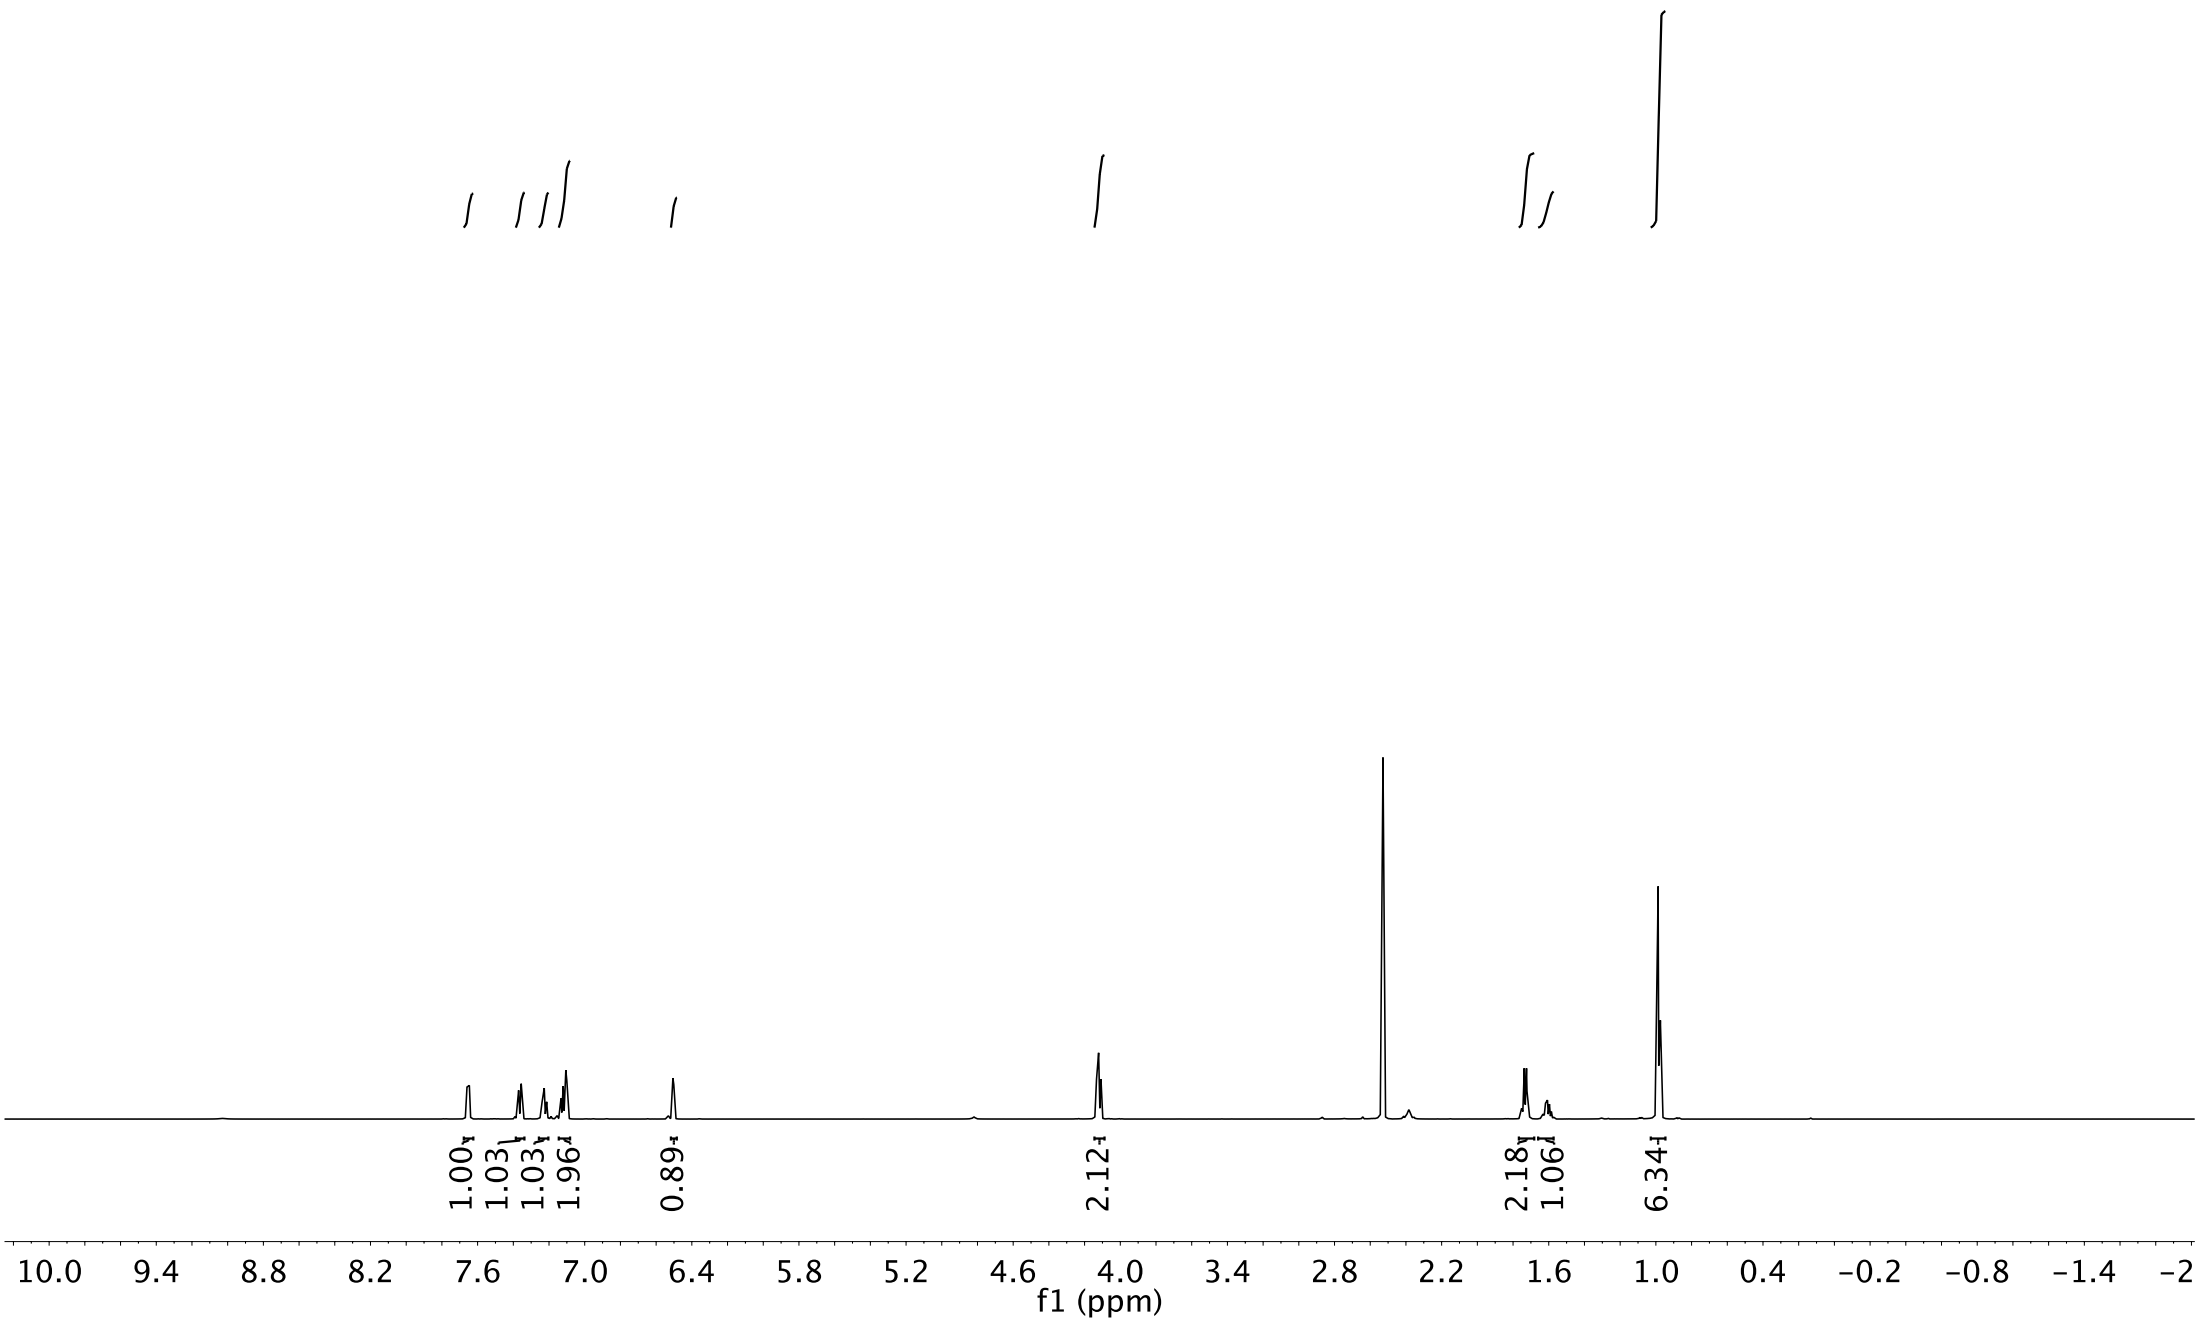



-135.78  
128.46  
127.58  
121.20  
120.83  
119.05  
-109.28  
-100.78  
44.44  
40.72  
38.92  
-25.61  
-22.37  
S52

190 180 170 160 150 140 130 120 110 100 90 80 70 60 50 40 30 20 10 0  
f1 (ppm)

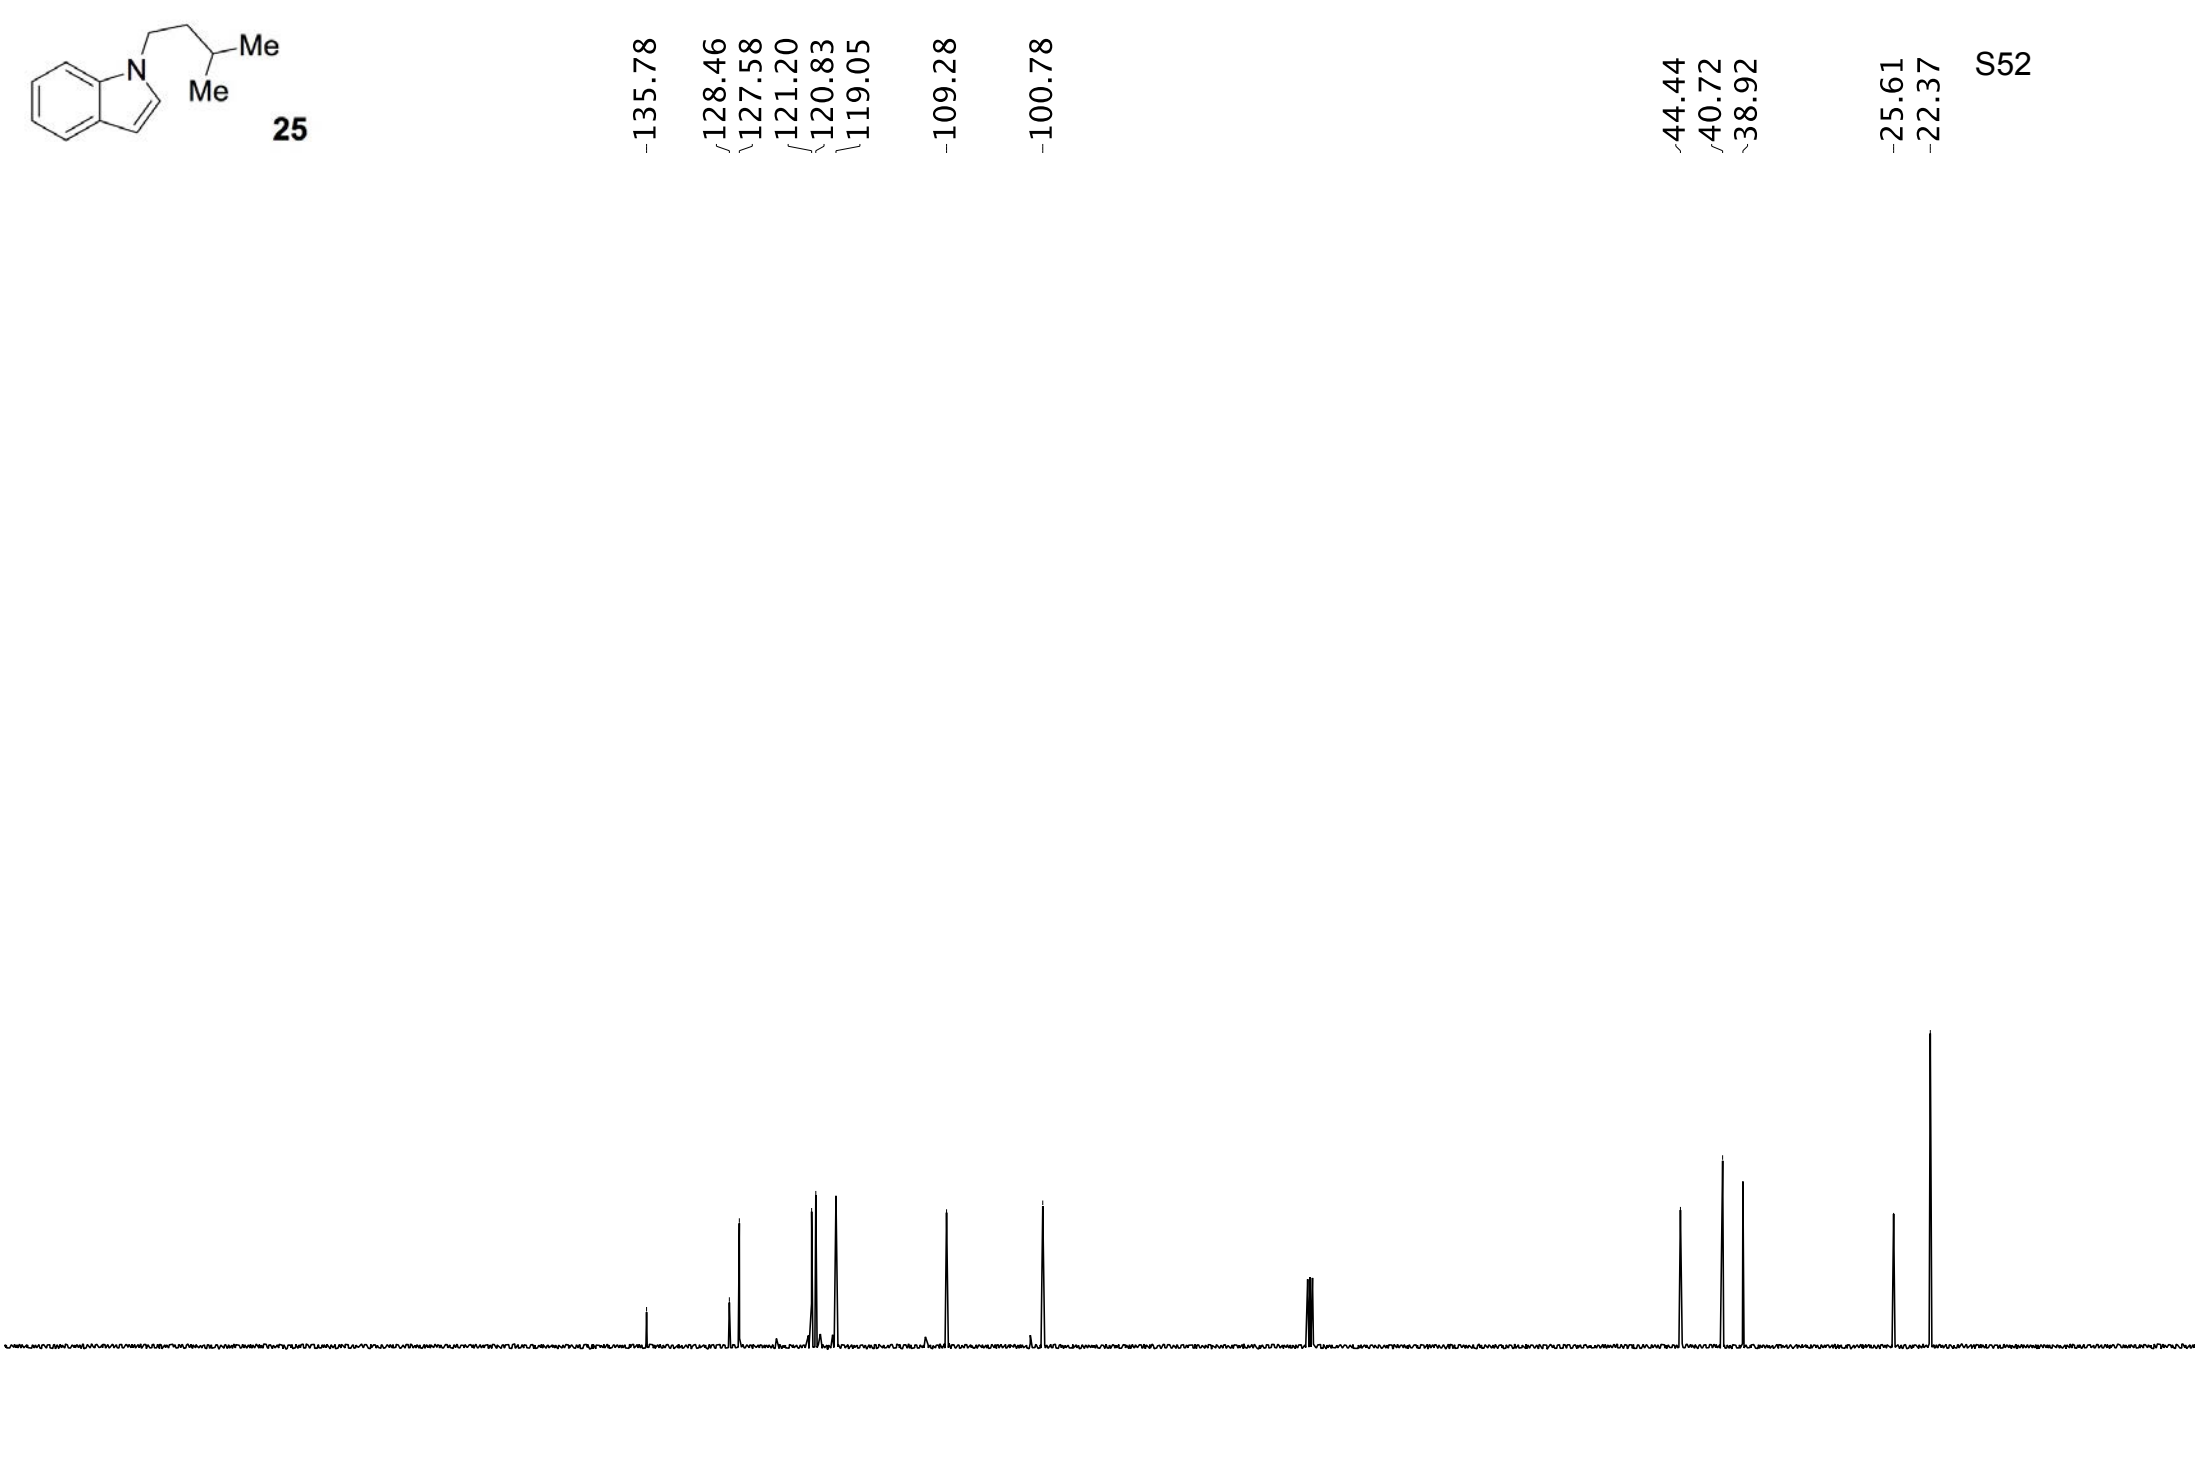



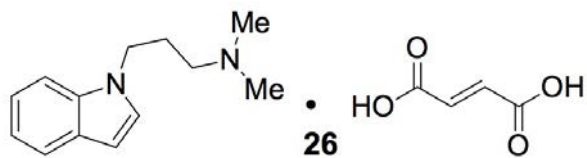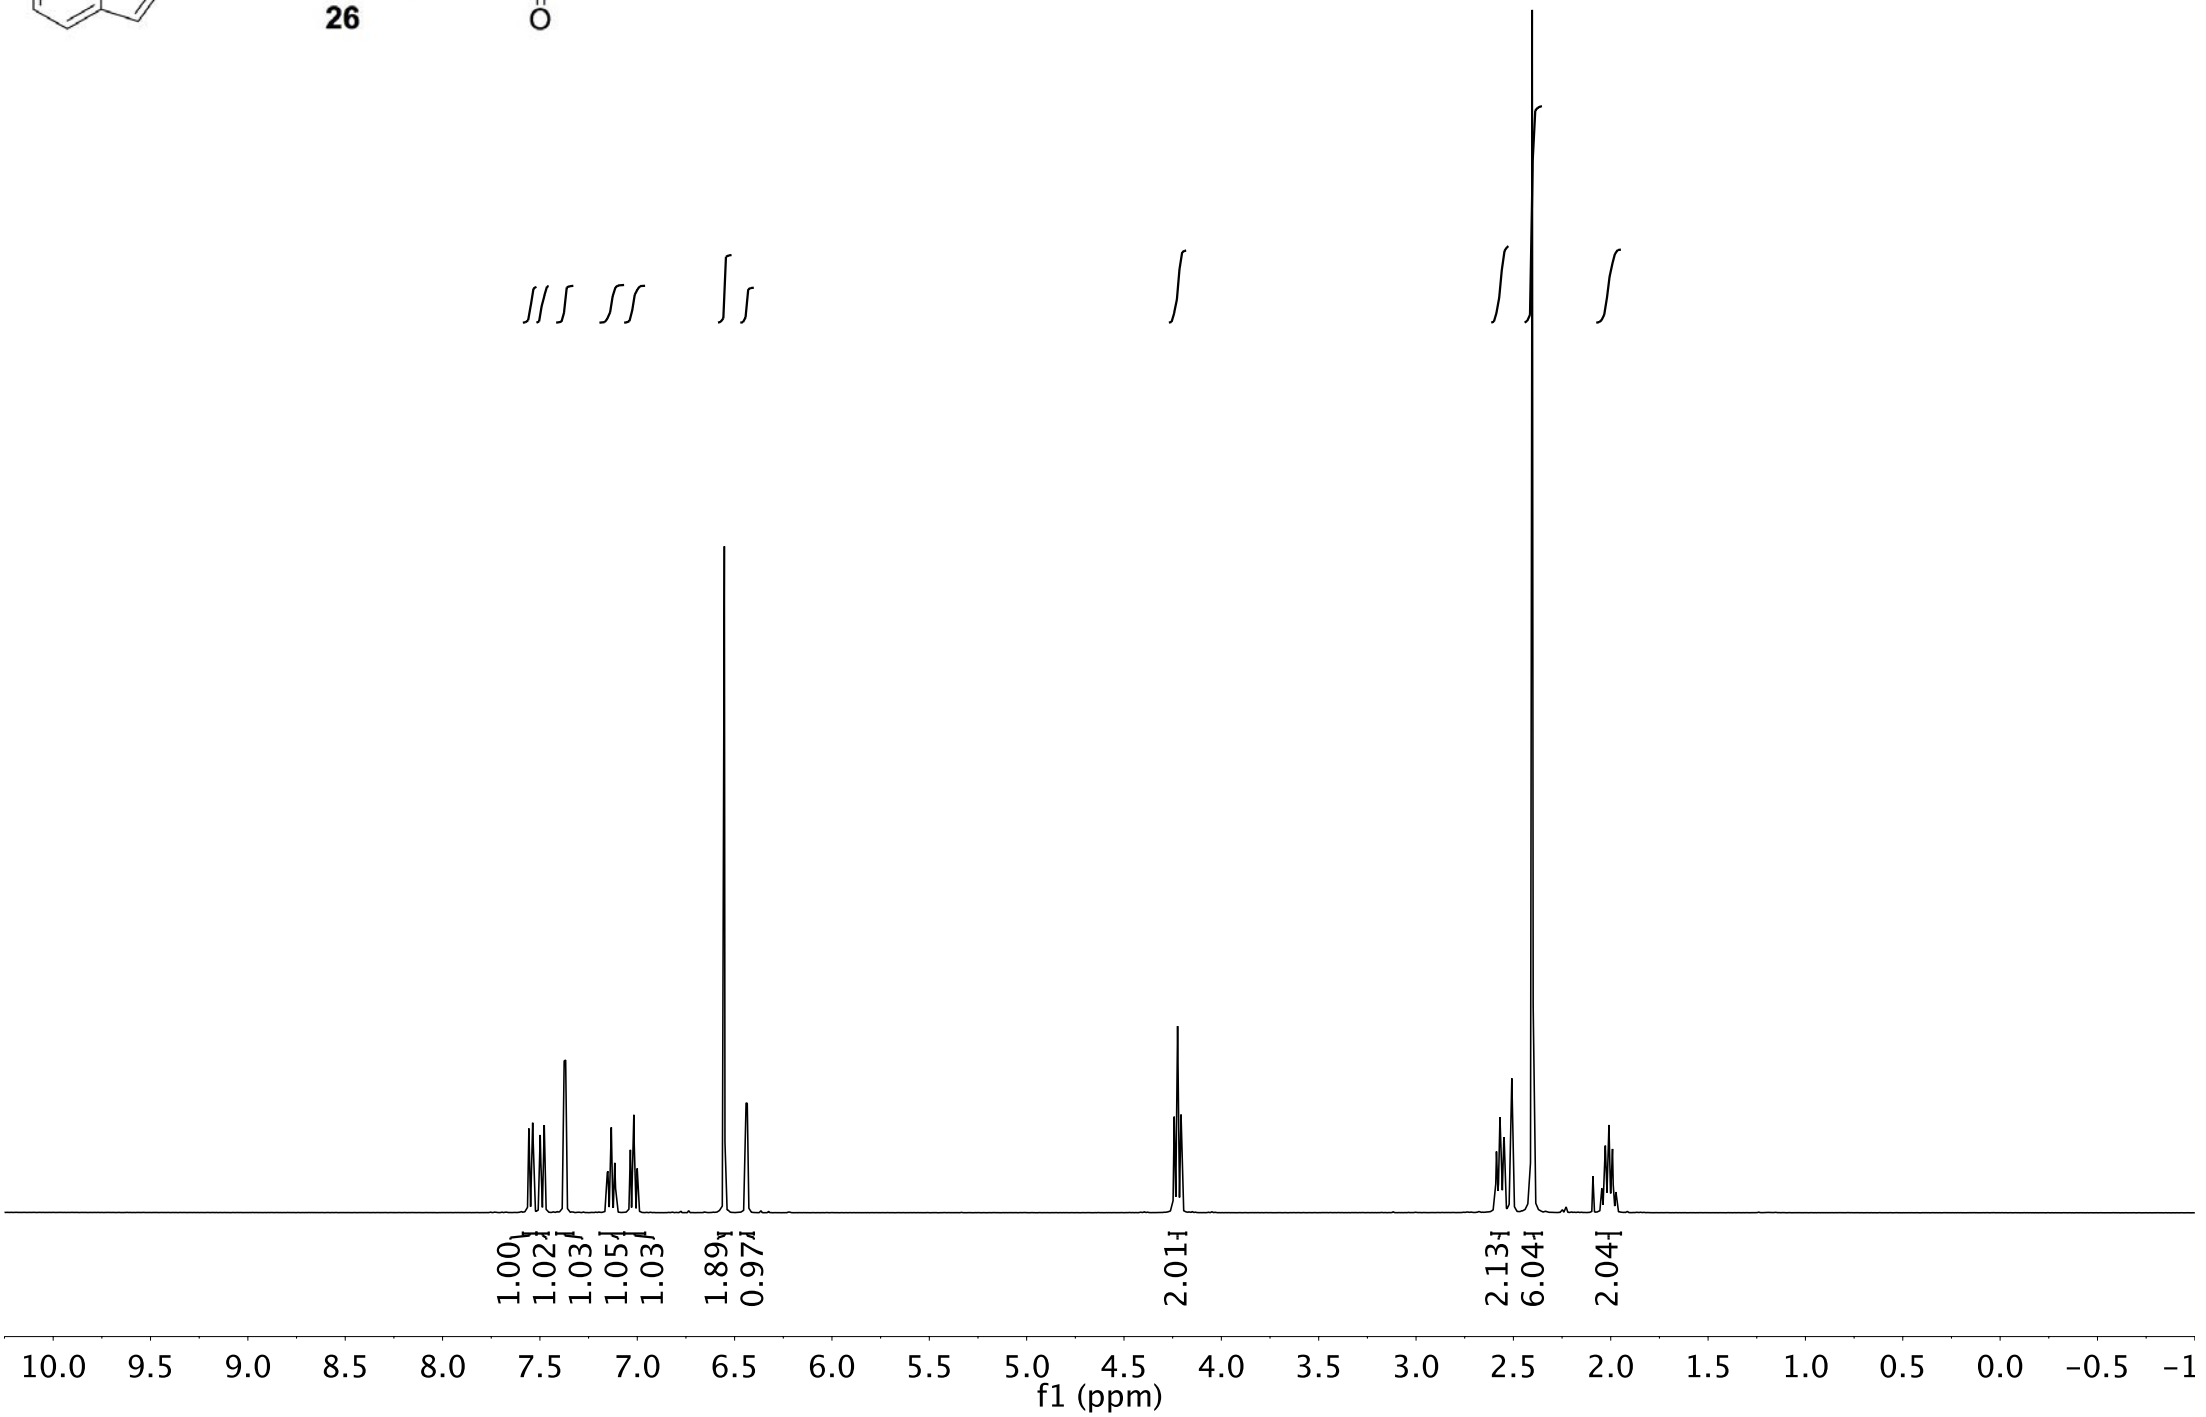

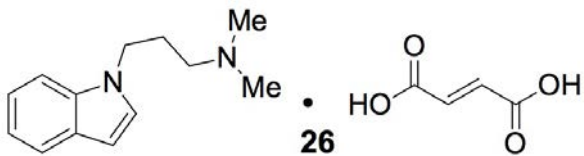

-167.19

135.60

134.62

128.49

128.07

120.99

120.41

118.90

-109.67

-100.61

-54.88

43.41

43.07

-26.26

S54

190 180 170 160 150 140 130 120 110 100 90 80 70 60 50 40 30 20 10 0  
f1 (ppm)

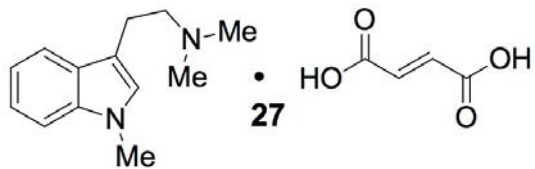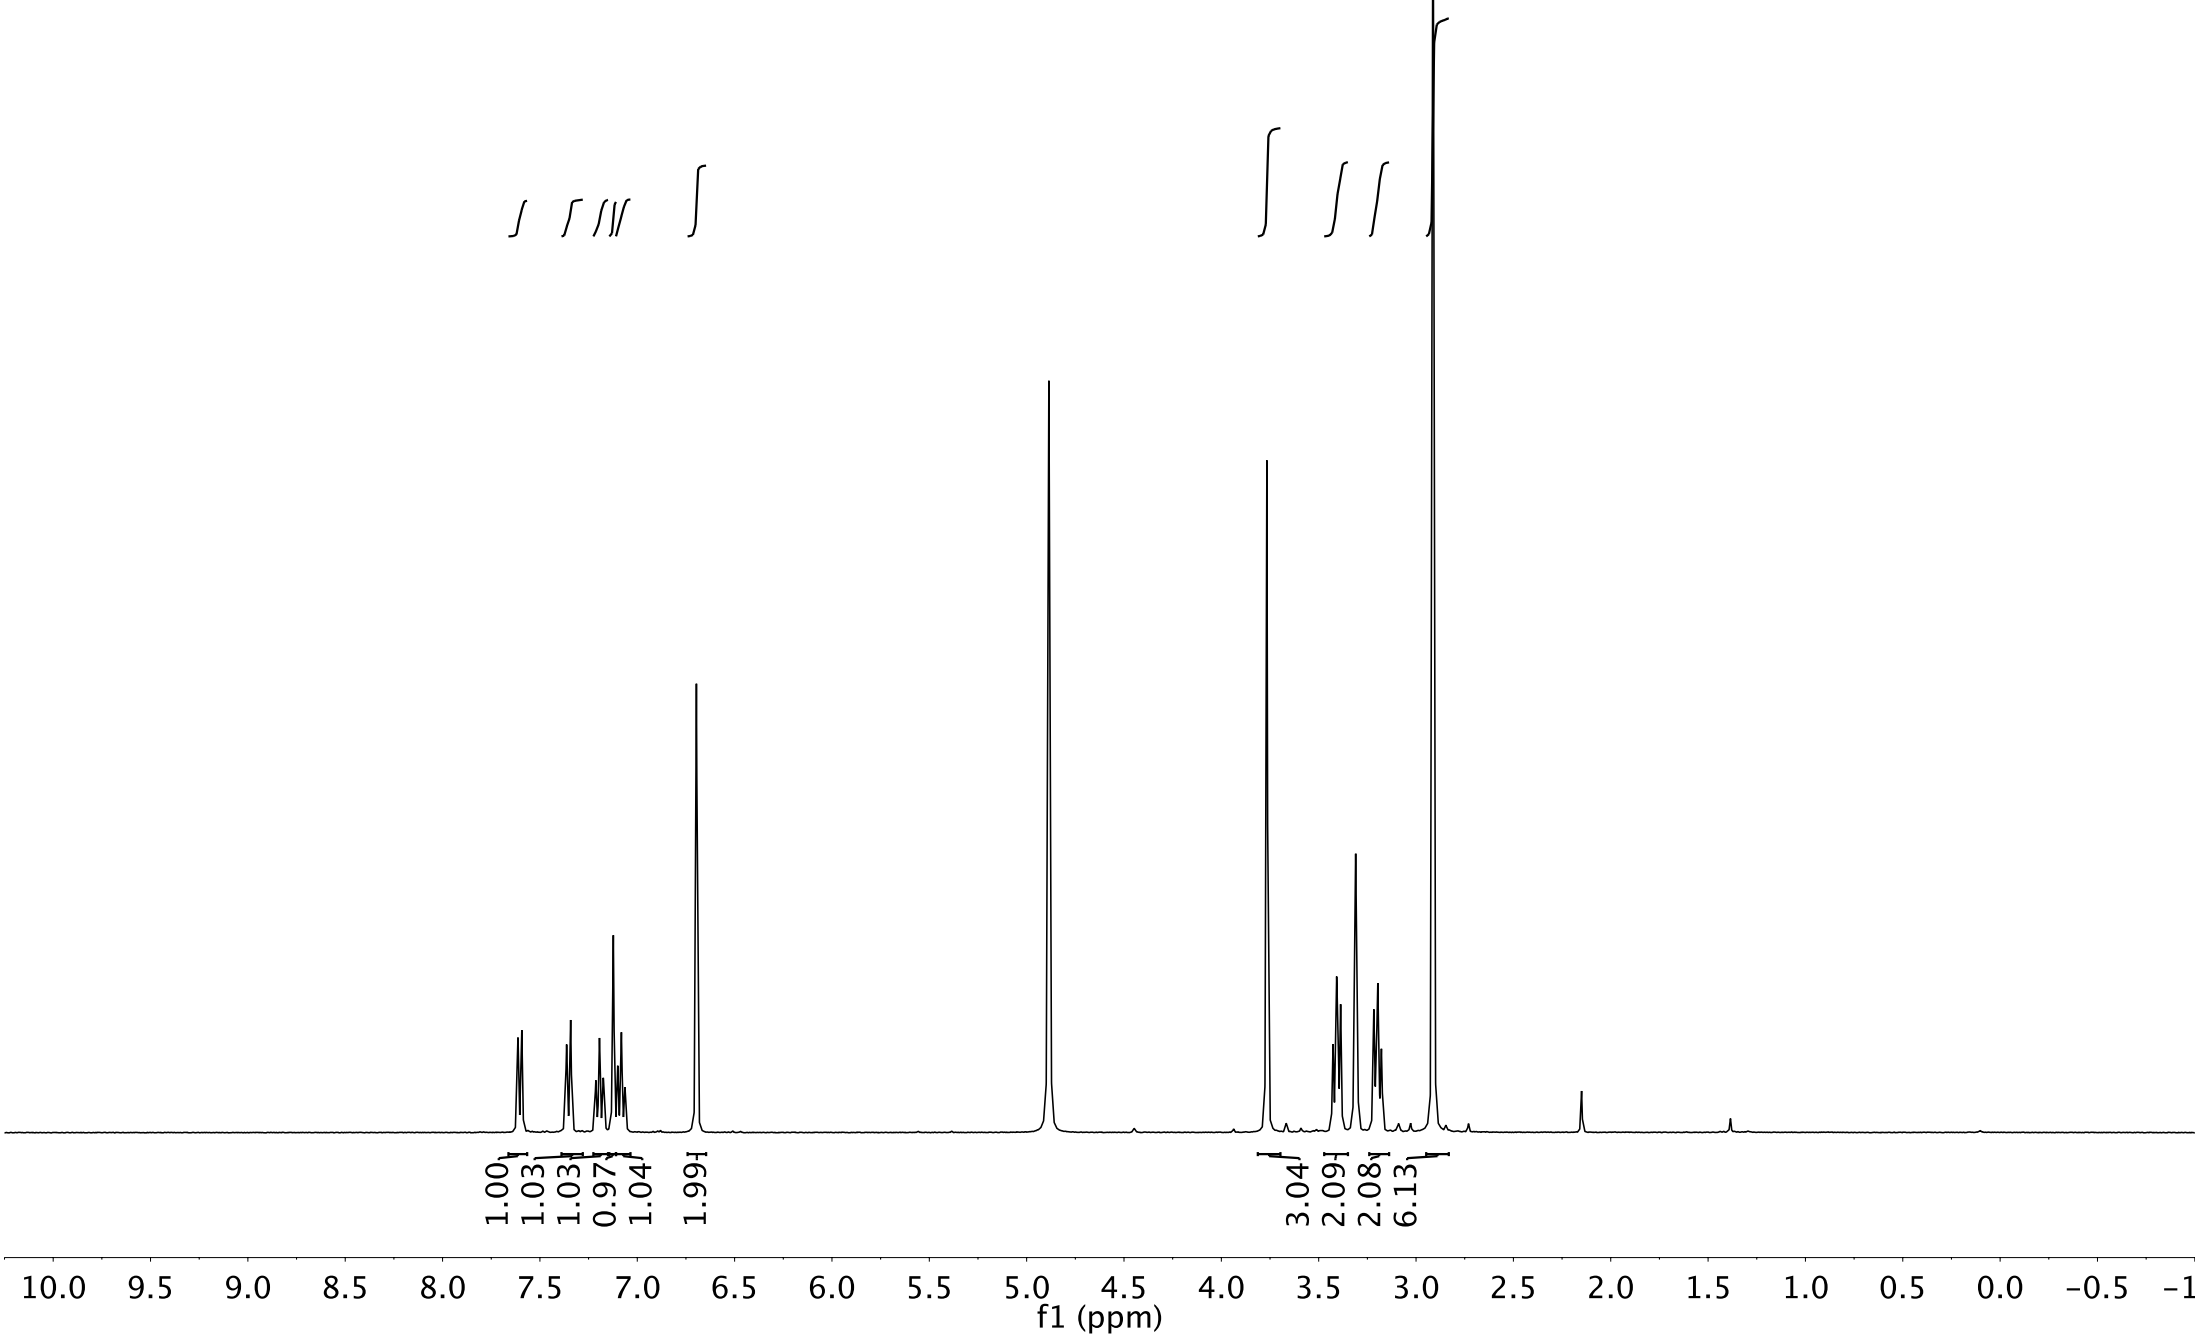

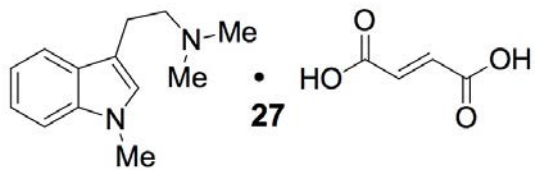

-171.44

-138.80

-136.23

-128.67

-128.59

-122.95

-120.20

-119.27

-110.53

-109.11

-59.12

-43.41

-32.77

-21.72

S56

190 180 170 160 150 140 130 120 110 100 90 80 70 60 50 40 30 20 10 0  
f1 (ppm)

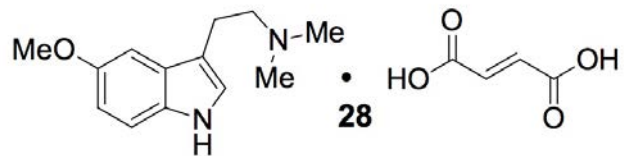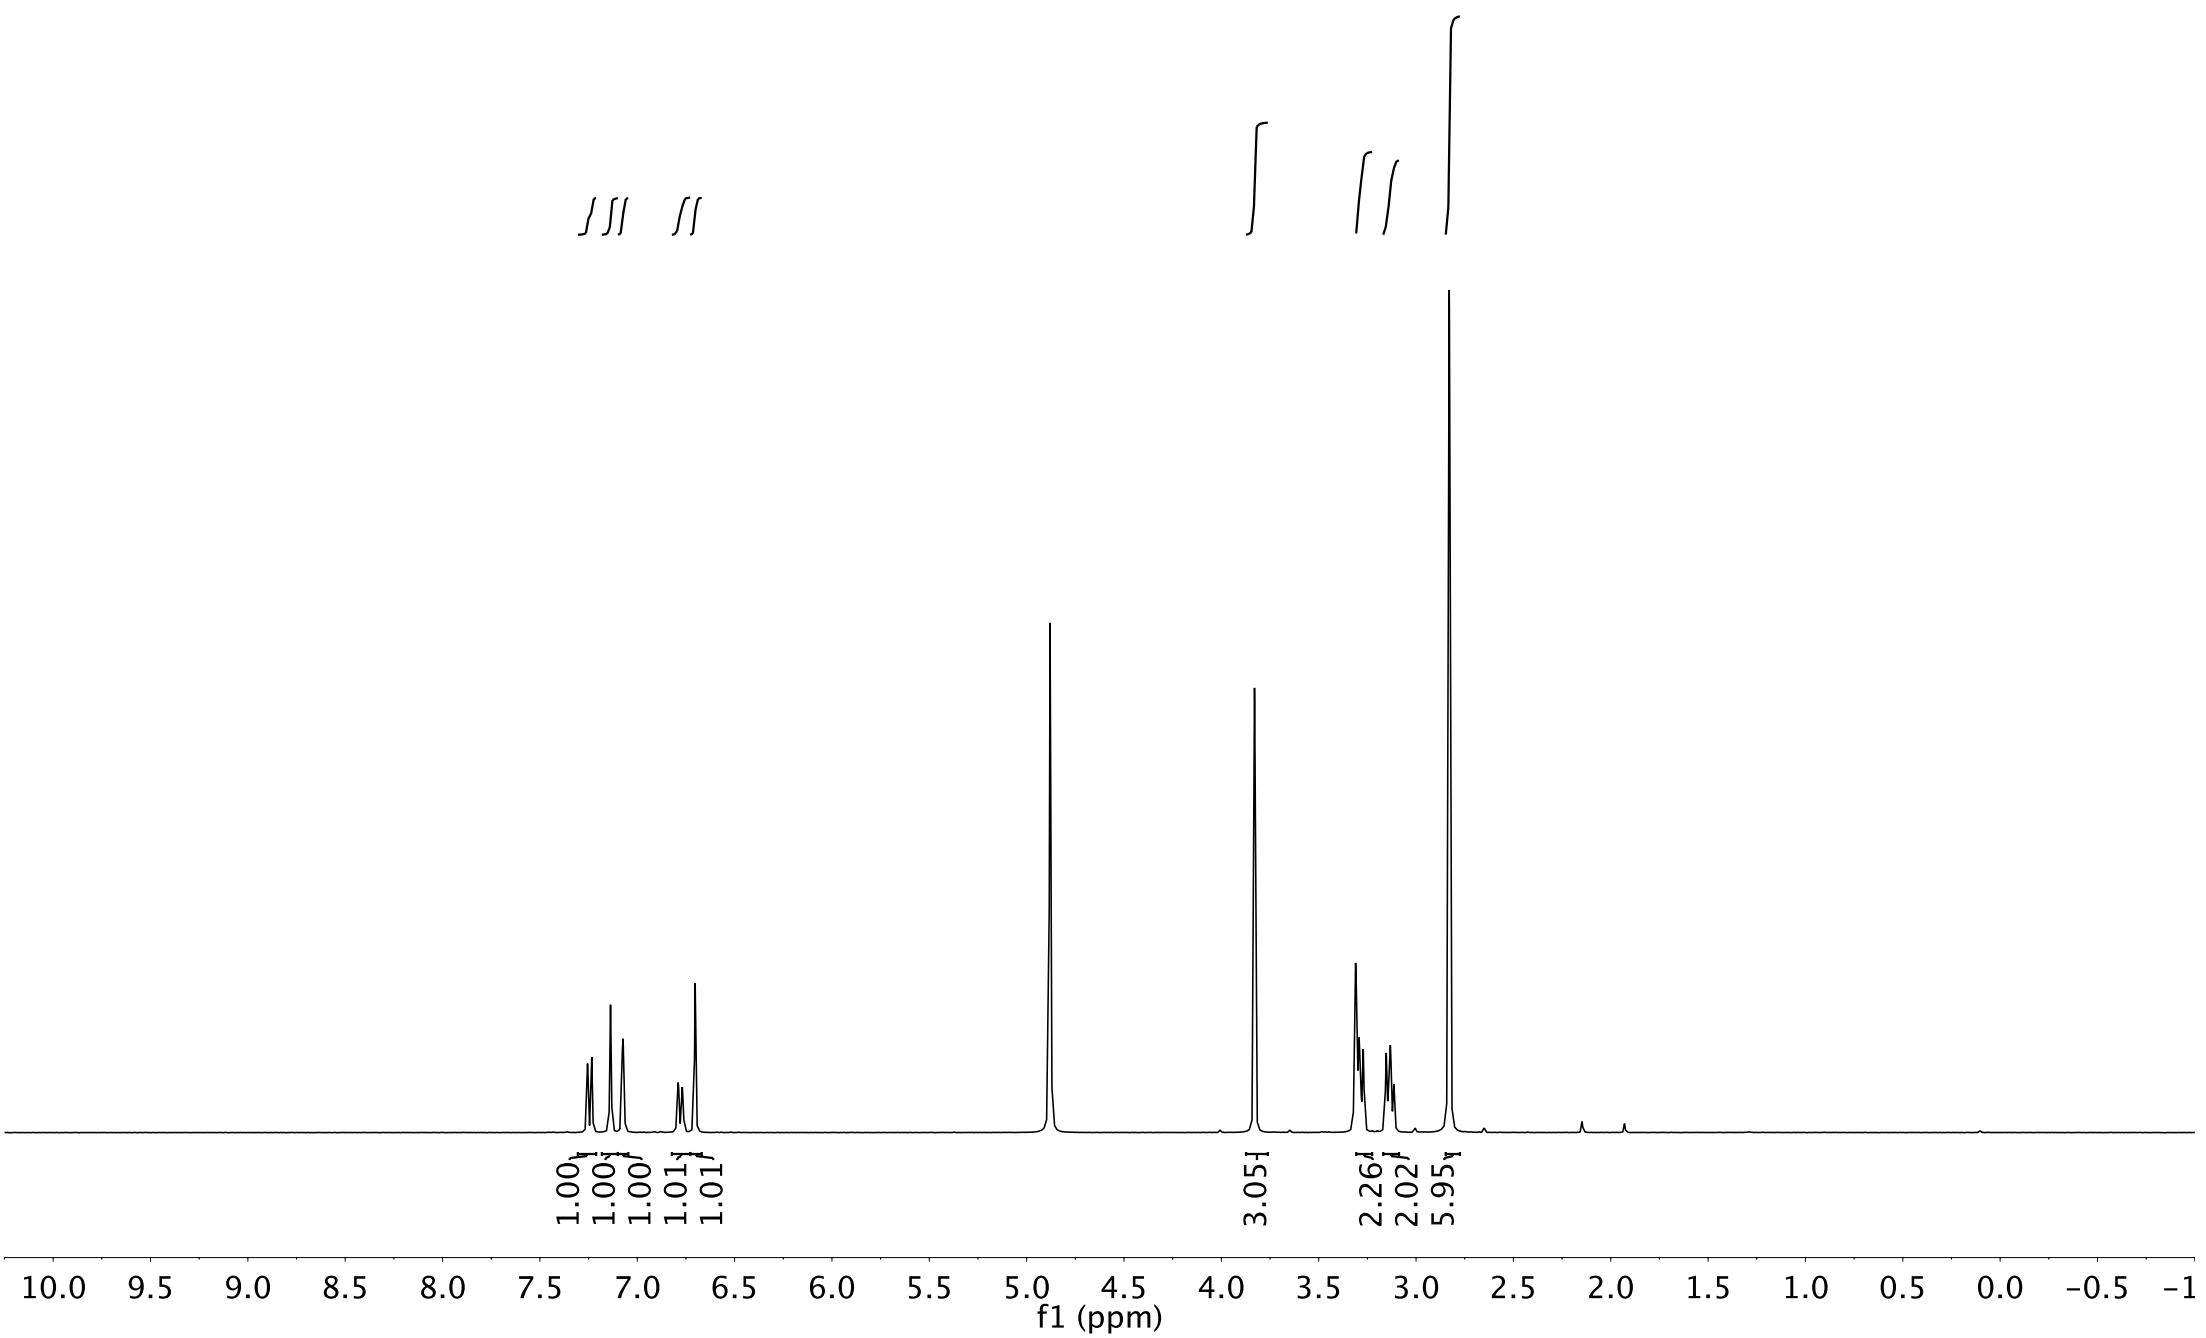

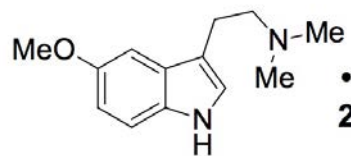

•  
28

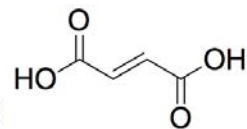

-174.36

-155.27

\137.09

\133.44

\128.49

\124.79

\113.20

\112.96

\110.05

-101.05

-59.25

-56.37

-43.56

-22.12

S58



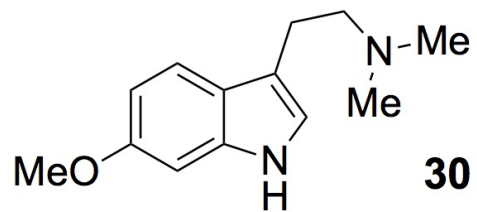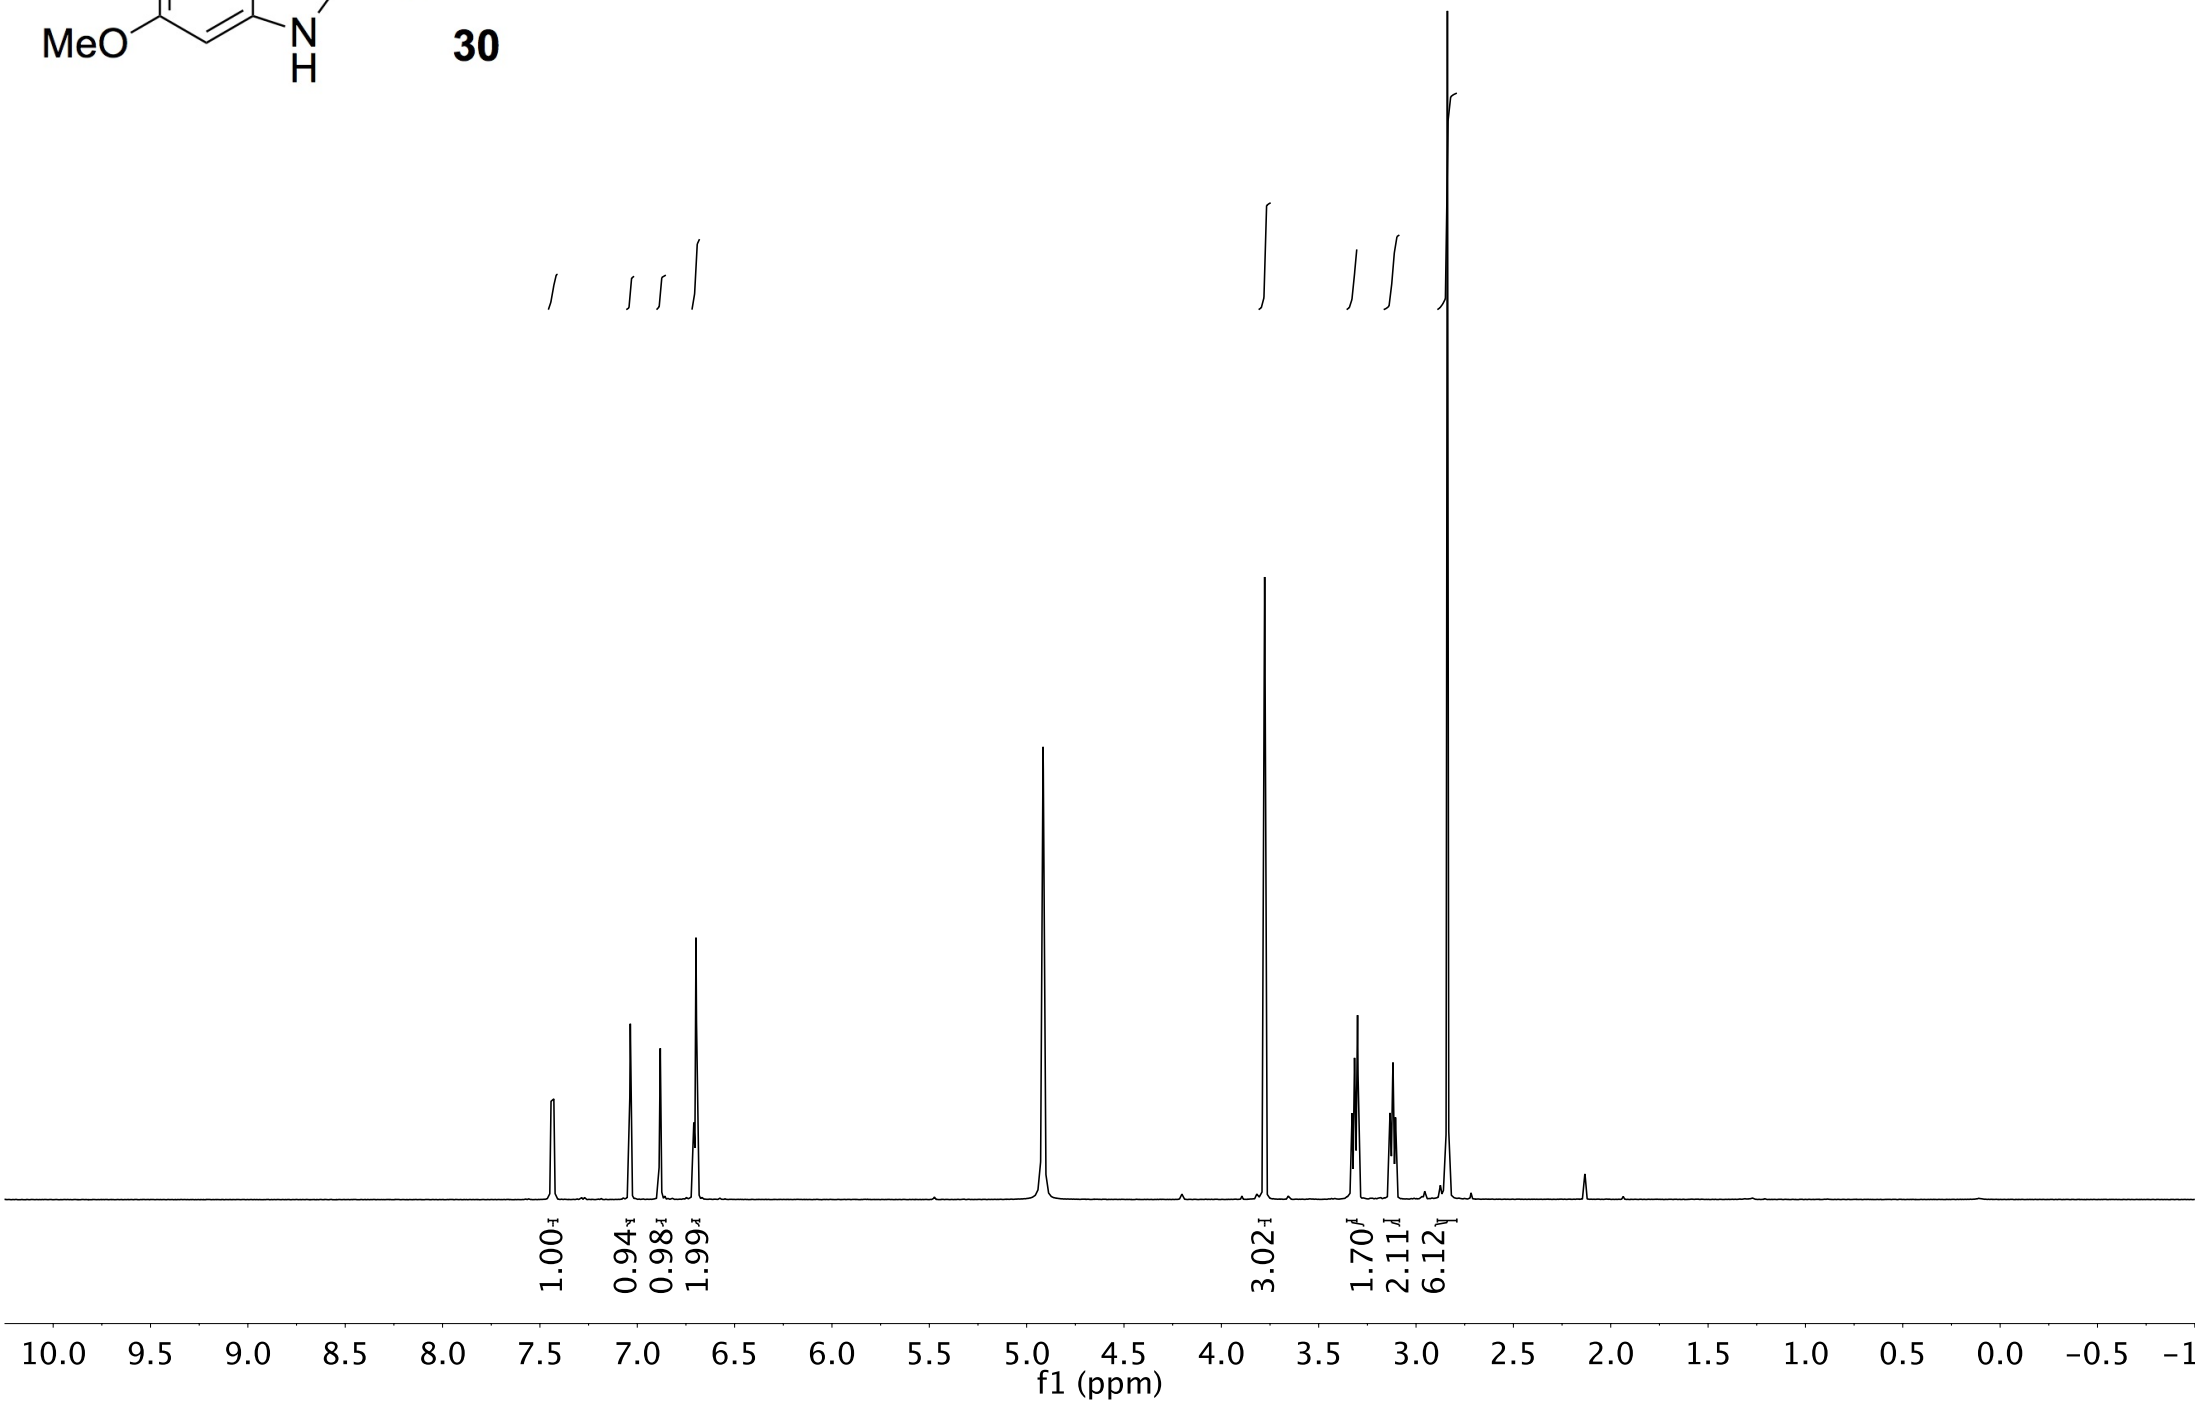

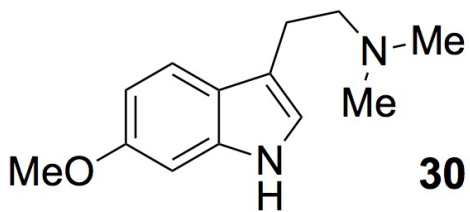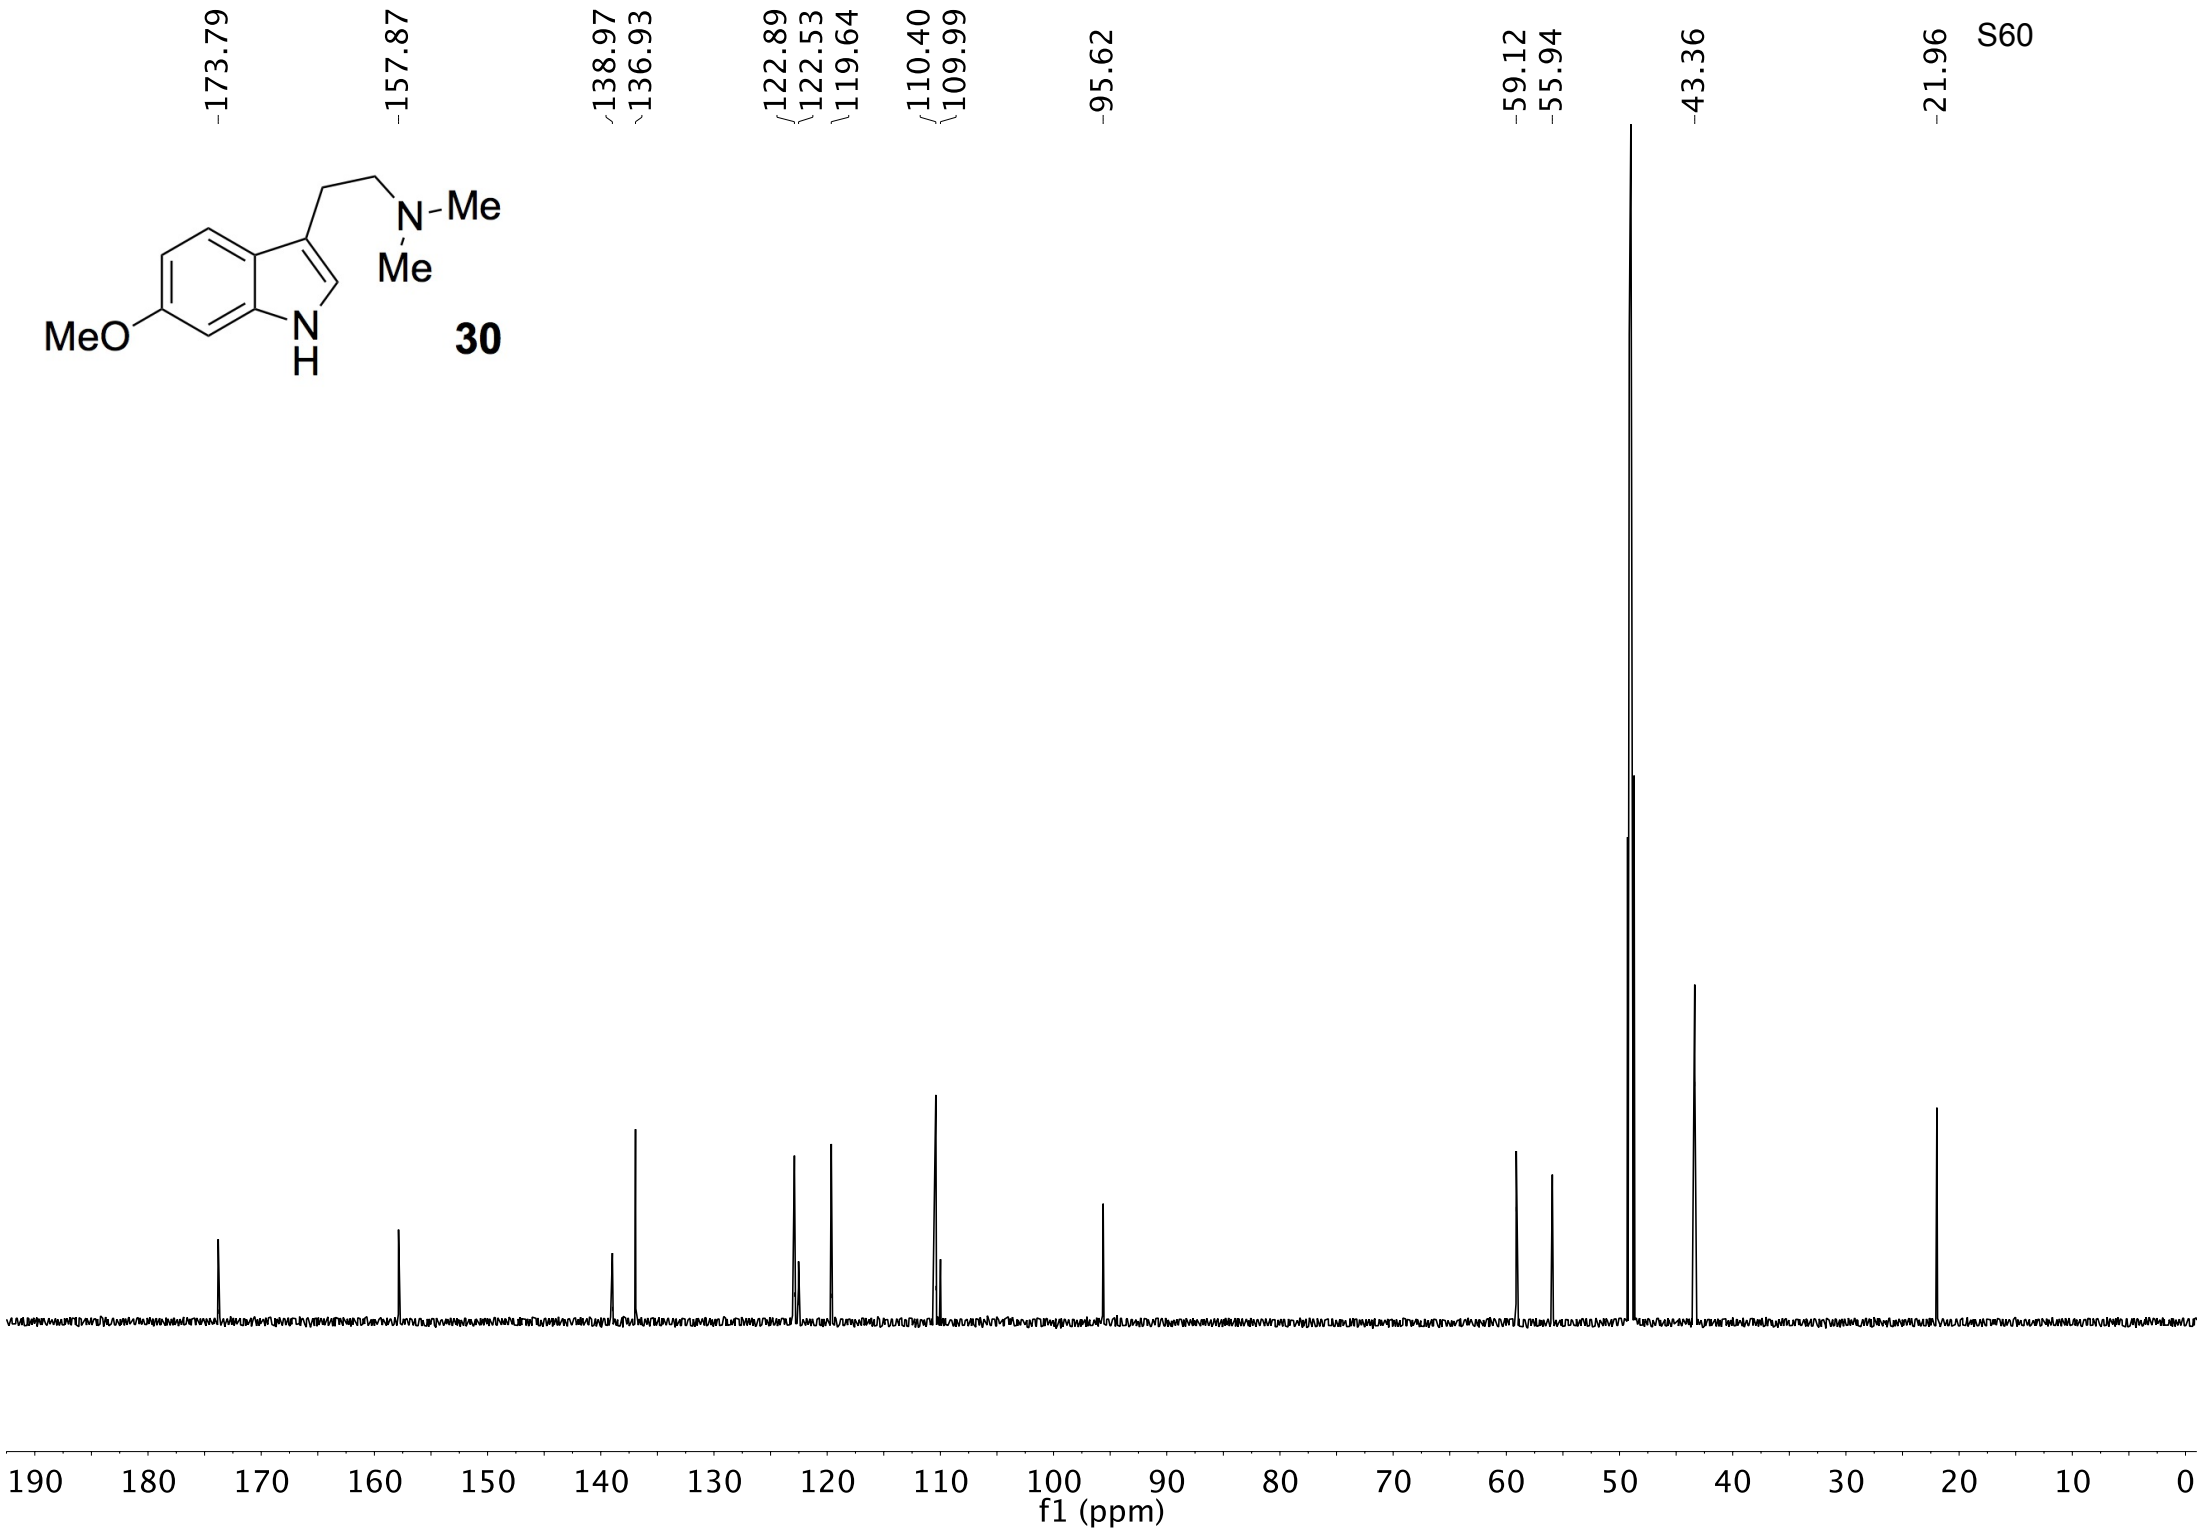



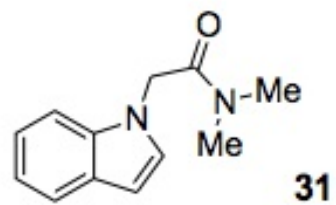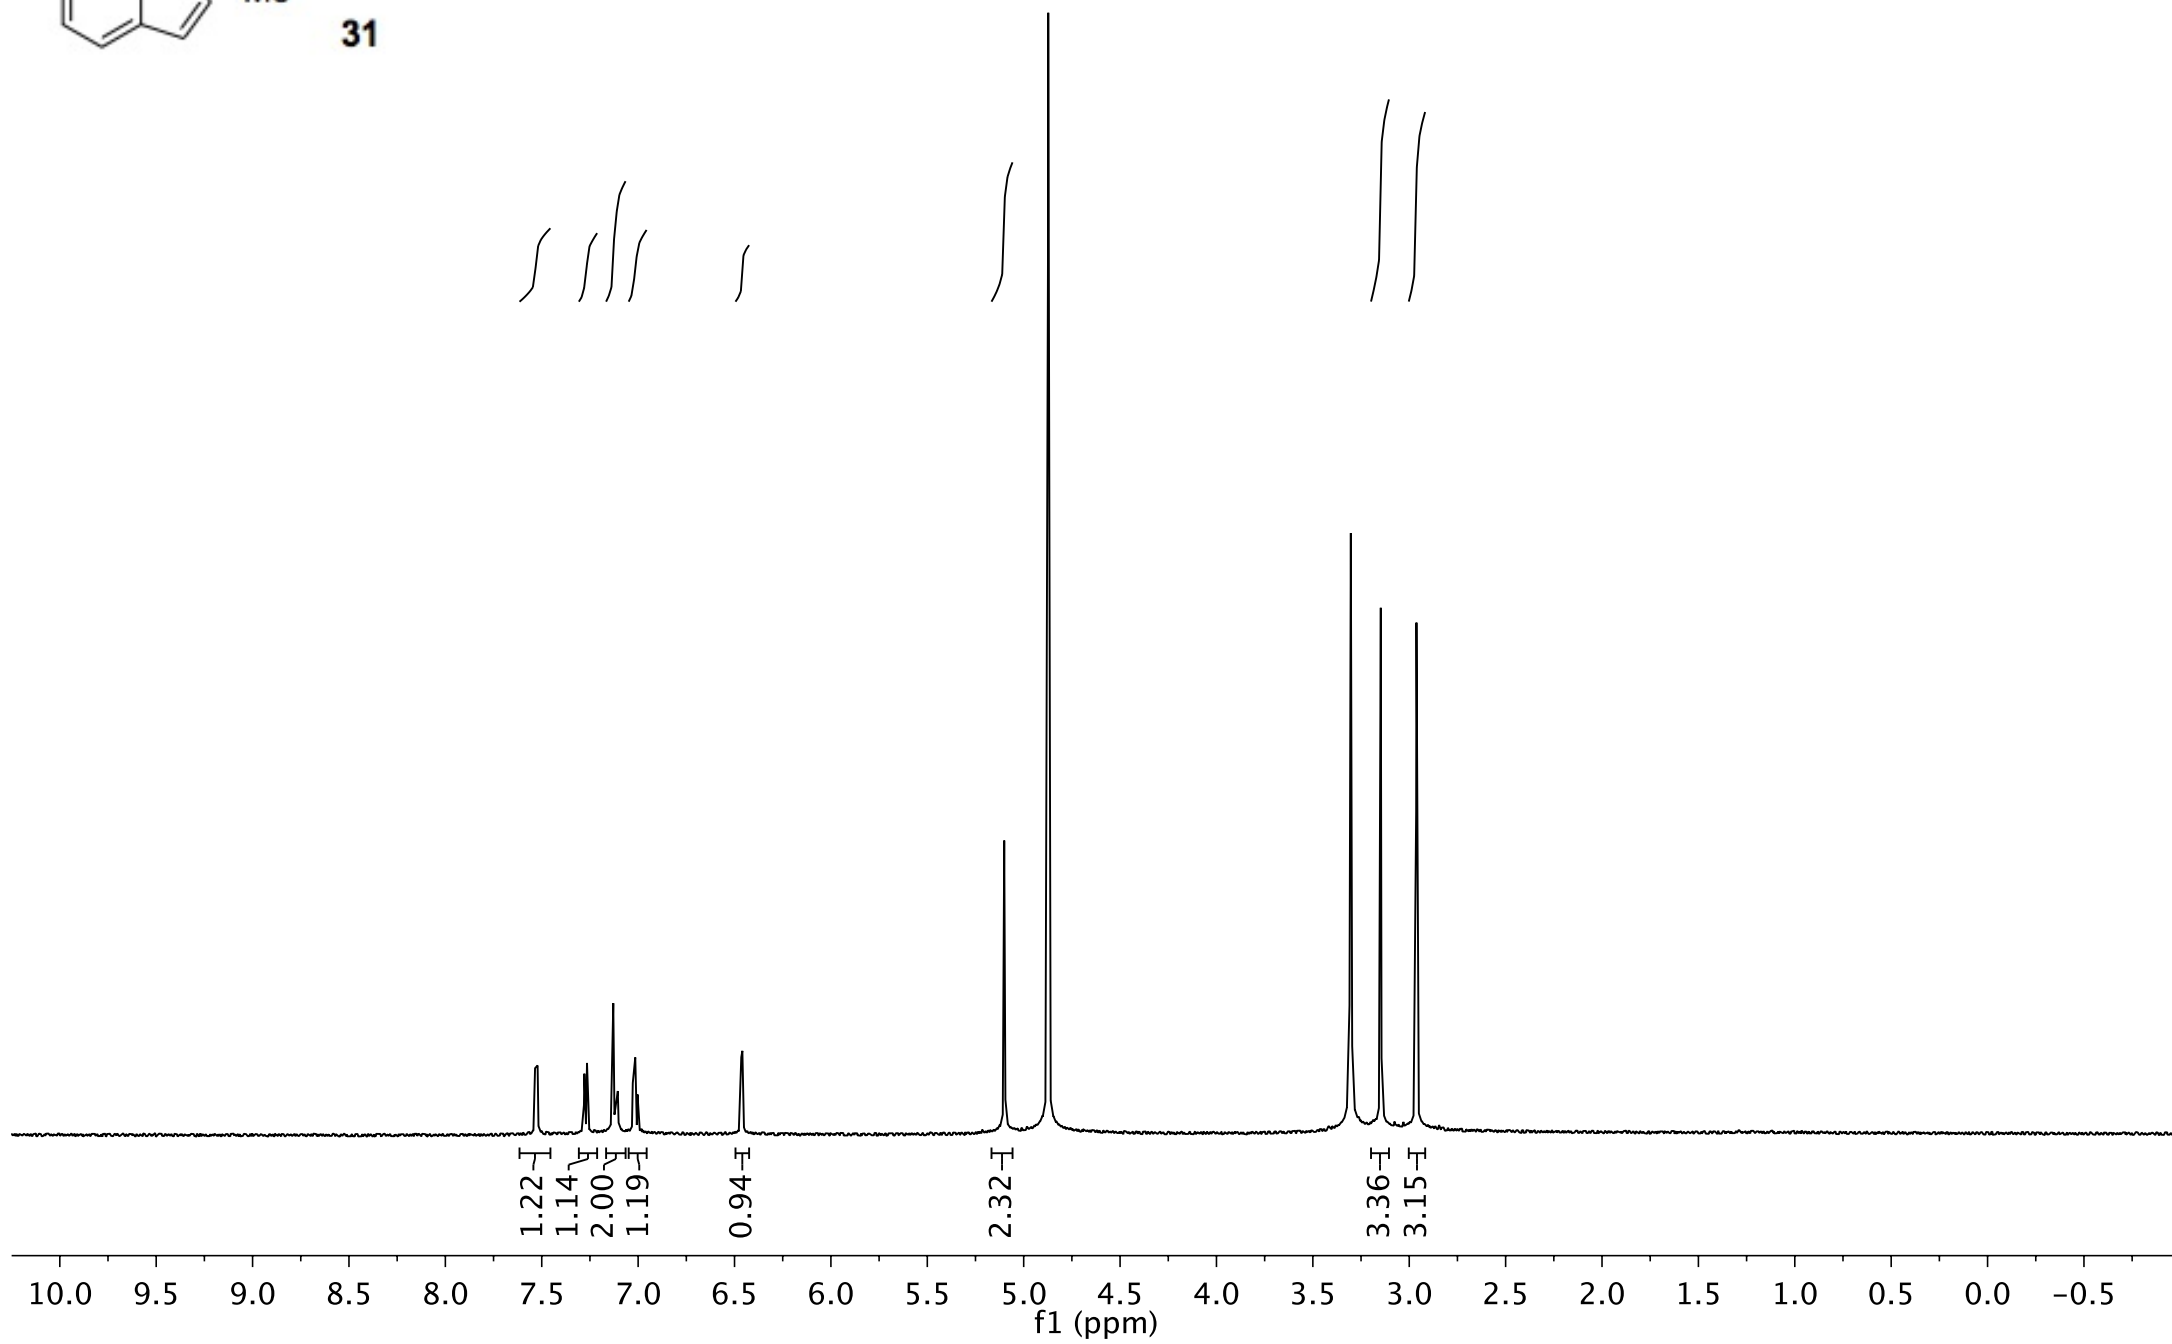



—167.40

—136.67

128.68

128.51

122.04

121.20

119.78

—109.12

—102.42

—48.24

36.72

36.06

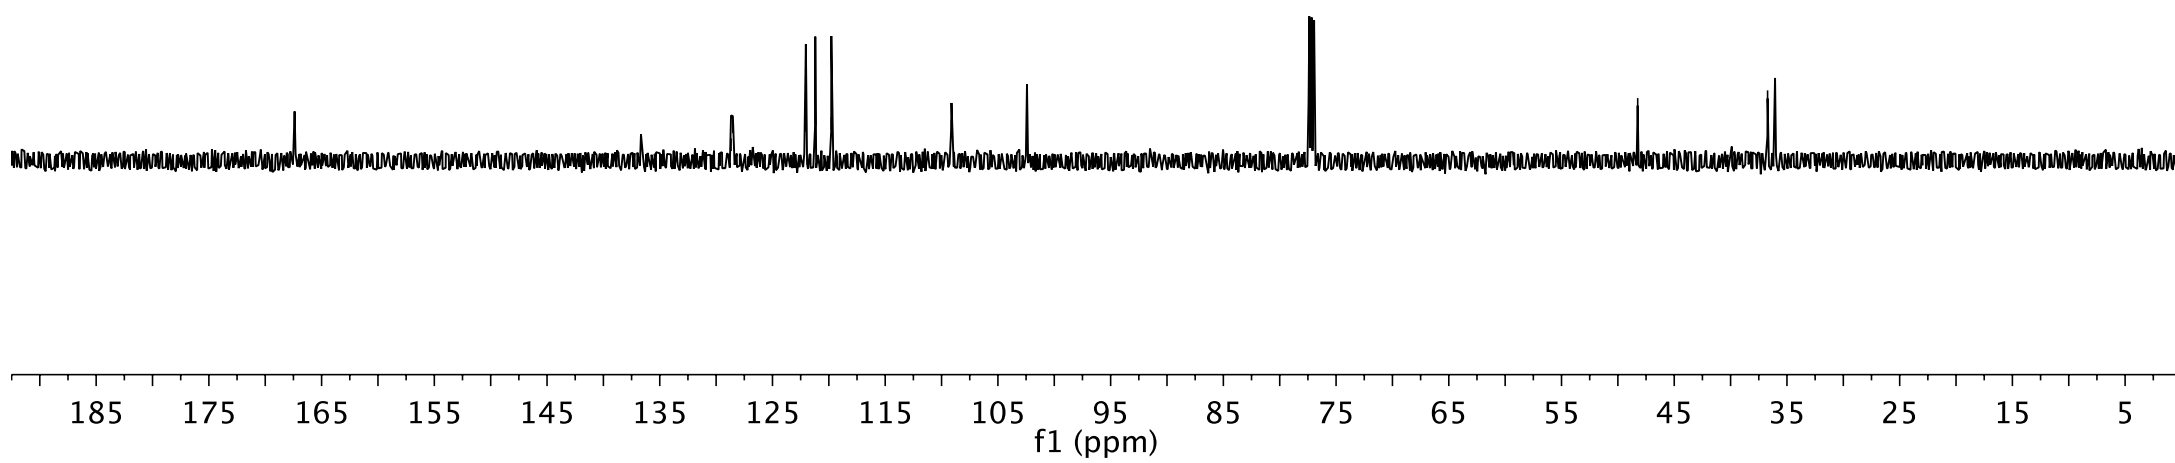

Supplement: NIHMS1569721-supplement-Supporting_Information.pdf [file NIHMS1569721-supplement-Supporting_Information.pdf]
